# Supplementary material for: DNA Barcode Goes Two-Dimensions: DNA QR Code Web Server
Source: PLoS One. 2012 May 4;7(5):e35146. doi: 10.1371/journal.pone.0035146 (PMC3344831; doi:10.1371/journal.pone.0035146)
Supplement: Table S5 — Sizes for 2D barcodes encoded from DNA sequences for matK. (XLS) [file pone.0035146.s006.xls]

## Sheet: Suppl_table5_matK
Table S5: Sizes for 2D barcodes encoded from DNA sequences for matK.
File name	Sequence length	Aztec_code	CodaBlock-F	Data_Matrix	PDF417	PDF417_Truncated	QR_code	QR_code_2005
refbc_100714_AF176867	174	21434	150582	24758	181718	144714	27122	27122
refbc_100714_AF301493	173	21434	150582	24758	181718	144714	27122	27122
refbc_101729_EF590403	510	56342	207382	66302	261362	226522	67222	67222
refbc_101772_AF176869	174	21434	150582	24758	181718	144714	27122	27122
refbc_101772_AF176890	174	21434	150582	24758	181718	144714	27122	27122
refbc_101775_AF176876	174	21434	150582	24758	181718	144714	27122	27122
refbc_101775_AF176894	174	21434	150582	24758	181718	144714	27122	27122
refbc_103475_DQ508556	171	21434	150582	24758	181718	144714	27122	27122
refbc_103480_AY042415	316	36170	178982	51262	218722	181718	48942	48942
refbc_103480_AY042416	316	36170	178982	51262	218722	181718	48942	48942
refbc_103480_AY042417	316	36170	178982	51262	218722	181718	48942	48942
refbc_103480_AY042428	462	48942	207382	66302	252362	218722	60782	60782
refbc_103480_AY042429	462	48942	207382	66302	252362	218722	60782	60782
refbc_103480_AY042430	462	48942	207382	66302	252362	218722	60782	60782
refbc_103482_AY042475	357	41174	187502	51262	235542	198538	48942	48942
refbc_103482_AY042476	357	41174	187502	51262	235542	198538	48942	48942
refbc_103482_AY042477	357	41174	187502	51262	235542	198538	48942	48942
refbc_103482_AY042478	357	41174	187502	51262	235542	198538	48942	48942
refbc_103482_AY042489	357	41174	187502	51262	235542	198538	48942	48942
refbc_103482_AY042490	357	41174	187502	51262	235542	198538	48942	48942
refbc_103483_AY042481	357	41174	187502	51262	235542	198538	48942	48942
refbc_103483_AY042482	357	41174	187502	51262	235542	198538	48942	48942
refbc_103484_AY042465	311	36170	178982	51262	218722	181718	41174	41174
refbc_103484_AY042479	357	41174	187502	51262	235542	198538	48942	48942
refbc_103484_AY042480	357	41174	187502	51262	235542	198538	48942	48942
refbc_103485_AY042485	357	41174	187502	51262	235542	198538	48942	48942
refbc_103485_AY042486	357	41174	187502	51262	235542	198538	48942	48942
refbc_103802_DQ420007	448	48942	198862	66302	252362	218722	60782	60782
refbc_103802_DQ420031	522	56342	218742	66302	270362	234322	67222	67222
refbc_104518_AF176868	174	21434	150582	24758	181718	144714	27122	27122
refbc_104518_AF176891	174	21434	150582	24758	181718	144714	27122	27122
refbc_104519_AF176874	174	21434	150582	24758	181718	144714	27122	27122
refbc_104519_AF176893	174	21434	150582	24758	181718	144714	27122	27122
refbc_104519_AY362769	206	27122	159102	24758	198538	164898	31486	31486
refbc_104521_AF176882	174	21434	150582	24758	181718	144714	27122	27122
refbc_104521_AF176895	174	21434	150582	24758	181718	144714	27122	27122
refbc_104522_AF176877	174	21434	150582	24758	181718	144714	27122	27122
refbc_104522_AF176885	174	21434	150582	24758	181718	144714	27122	27122
refbc_104522_AF176889	174	21434	150582	24758	181718	144714	27122	27122
refbc_104522_AF229152	174	21434	150582	24758	181718	144714	27122	27122
refbc_104523_AF176881	174	21434	150582	24758	181718	144714	27122	27122
refbc_104523_AF176884	174	21434	150582	24758	181718	144714	27122	27122
refbc_104523_AF176886	174	21434	150582	24758	181718	144714	27122	27122
refbc_104523_AF176887	174	21434	150582	24758	181718	144714	27122	27122
refbc_104523_AF176892	174	21434	150582	24758	181718	144714	27122	27122
refbc_104523_AF229148	174	21434	150582	24758	181718	144714	27122	27122
refbc_104523_AF229150	174	21434	150582	24758	181718	144714	27122	27122
refbc_104523_AF229153	174	21434	150582	24758	181718	144714	27122	27122
refbc_104528_AF176878	174	21434	150582	24758	181718	144714	27122	27122
refbc_104528_AF176888	174	21434	150582	24758	181718	144714	27122	27122
refbc_104528_AF229149	174	21434	150582	24758	181718	144714	27122	27122
refbc_104528_AF229151	174	21434	150582	24758	181718	144714	27122	27122
refbc_104598_AF176899	174	21434	150582	24758	181718	144714	27122	27122
refbc_104598_AY350644	218	27122	159102	30846	198538	164898	31486	31486
refbc_106548_AF309208	401	41174	198862	51262	235542	198538	54662	54662
refbc_106549_AF309209	467	48942	207382	66302	252362	218722	60782	60782
refbc_106550_AF309236	410	41174	198862	51262	235542	198538	54662	54662
refbc_106552_AF309210	410	41174	198862	51262	235542	198538	54662	54662
refbc_106553_AF309211	405	41174	198862	51262	235542	198538	54662	54662
refbc_106553_AF309212	467	48942	207382	66302	252362	218722	60782	60782
refbc_106553_AF309213	408	41174	198862	51262	235542	198538	54662	54662
refbc_106556_AF309214	456	48942	207382	66302	252362	218722	60782	60782
refbc_106557_AF309215	405	41174	198862	51262	235542	198538	54662	54662
refbc_106562_AF309219	410	41174	198862	51262	235542	198538	54662	54662
refbc_106563_AF309220	410	41174	198862	51262	235542	198538	54662	54662
refbc_106566_AF309221	401	41174	198862	51262	235542	198538	54662	54662
refbc_106567_AF309222	377	41174	187502	51262	235542	198538	54662	54662
refbc_106567_AF309223	410	41174	198862	51262	235542	198538	54662	54662
refbc_106567_AF309224	401	41174	198862	51262	235542	198538	54662	54662
refbc_106567_AF309225	401	41174	198862	51262	235542	198538	54662	54662
refbc_106567_AF309226	371	41174	187502	51262	235542	198538	54662	54662
refbc_106567_AF309227	391	41174	198862	51262	235542	198538	54662	54662
refbc_106567_AF309228	410	41174	198862	51262	235542	198538	54662	54662
refbc_106568_AF309232	401	41174	198862	51262	235542	198538	54662	54662
refbc_106570_AF309233	427	48942	198862	66302	252362	218722	60782	60782
refbc_106571_AF309234	467	48942	207382	66302	252362	218722	60782	60782
refbc_106572_AF309235	405	41174	198862	51262	235542	198538	54662	54662
refbc_106573_AF309238	410	41174	198862	51262	235542	198538	54662	54662
refbc_106574_AF309229	300	36170	178982	35490	218722	181718	41174	41174
refbc_108412_AY335987	442	48942	198862	66302	252362	218722	60782	60782
refbc_109582_AF459984	337	36170	187502	51262	235542	198538	48942	48942
refbc_109996_EF590417	510	56342	207382	66302	261362	226522	67222	67222
refbc_112543_EU527824	478	48942	207382	66302	252362	218722	60782	60782
refbc_113416_DQ923847	556	65382	218742	80062	282266	243942	77062	77062
refbc_116737_DQ397978	190	27122	150582	24758	198538	164898	31486	31486
refbc_116739_DQ397988	359	41174	187502	51262	235542	198538	48942	48942
refbc_116739_DQ397989	359	41174	187502	51262	235542	198538	48942	48942
refbc_118342_AB127585	207	27122	159102	24758	198538	164898	31486	31486
refbc_118354_AB127586	208	27122	159102	24758	198538	164898	31486	31486
refbc_121174_DQ846528	153	21434	139222	20914	181718	144714	21434	21434
refbc_121174_DQ846529	153	21434	139222	20914	181718	144714	21434	21434
refbc_121174_DQ846530	153	21434	139222	20914	181718	144714	21434	21434
refbc_121174_DQ846543	153	21434	139222	20914	181718	144714	21434	21434
refbc_121174_DQ846544	153	21434	139222	20914	181718	144714	21434	21434
refbc_121174_DQ846546	153	21434	139222	20914	181718	144714	21434	21434
refbc_121174_DQ846547	153	21434	139222	20914	181718	144714	21434	21434
refbc_121174_DQ846548	153	21434	139222	20914	181718	144714	21434	21434
refbc_121174_DQ846549	153	21434	139222	20914	181718	144714	21434	21434
refbc_121174_DQ846550	153	21434	139222	20914	181718	144714	21434	21434
refbc_121174_DQ846551	153	21434	139222	20914	181718	144714	21434	21434
refbc_121174_DQ846579	153	21434	139222	20914	181718	144714	21434	21434
refbc_121174_DQ846580	153	21434	139222	20914	181718	144714	21434	21434
refbc_121174_DQ846581	153	21434	139222	20914	181718	144714	21434	21434
refbc_121174_DQ846582	153	21434	139222	20914	181718	144714	21434	21434
refbc_121174_DQ846583	153	21434	139222	20914	181718	144714	21434	21434
refbc_121174_DQ846584	153	21434	139222	20914	181718	144714	21434	21434
refbc_122947_AJ580624	221	27122	159102	30846	198538	164898	31486	31486
refbc_122950_AJ580627	492	56342	207382	66302	252362	218722	67222	67222
refbc_122950_AJ580628	214	27122	159102	24758	198538	164898	31486	31486
refbc_123598_EF395570	455	48942	207382	66302	252362	218722	60782	60782
refbc_123601_EF395572	455	48942	207382	66302	252362	218722	60782	60782
refbc_123801_DQ923850	556	65382	218742	80062	282266	243942	77062	77062
refbc_124765_EF590394	513	56342	218742	66302	261362	226522	67222	67222
refbc_124931_DQ846537	153	21434	139222	20914	181718	144714	21434	21434
refbc_124931_DQ846538	153	21434	139222	20914	181718	144714	21434	21434
refbc_124931_DQ846539	153	21434	139222	20914	181718	144714	21434	21434
refbc_124947_GQ981959	464	48942	207382	66302	252362	218722	60782	60782
refbc_126280_EF395590	455	48942	207382	66302	252362	218722	60782	60782
refbc_126280_EF395591	455	48942	207382	66302	252362	218722	60782	60782
refbc_126280_EF395592	455	48942	207382	66302	252362	218722	60782	60782
refbc_126280_EF395593	455	48942	207382	66302	252362	218722	60782	60782
refbc_126281_EF395594	455	48942	207382	66302	252362	218722	60782	60782
refbc_126281_EF395595	455	48942	207382	66302	252362	218722	60782	60782
refbc_126281_EF395596	455	48942	207382	66302	252362	218722	60782	60782
refbc_126646_DQ882231	542	56342	218742	66302	272546	235542	77062	77062
refbc_126646_DQ882232	524	56342	218742	66302	270362	234322	67222	67222
refbc_126646_DQ882233	571	65382	218742	80062	282266	243942	77062	77062
refbc_126646_DQ882236	543	56342	218742	66302	272546	235542	77062	77062
refbc_128608_EF590398	519	56342	218742	66302	270362	234322	67222	67222
refbc_128702_AJ627934	334	36170	178982	51262	235542	198538	48942	48942
refbc_130418_EU669471	423	48942	198862	66302	252362	218722	60782	60782
refbc_130460_EU013158	432	48942	198862	66302	252362	218722	60782	60782
refbc_130460_EU013159	432	48942	198862	66302	252362	218722	60782	60782
refbc_130460_EU013160	432	48942	198862	66302	252362	218722	60782	60782
refbc_130460_EU013161	432	48942	198862	66302	252362	218722	60782	60782
refbc_131160_EF178973	596	65382	227262	80062	301706	260742	77062	77062
refbc_133202_AY555440	308	36170	178982	51262	218722	181718	41174	41174
refbc_133202_AY555441	308	36170	178982	51262	218722	181718	41174	41174
refbc_133204_EF590415	515	56342	218742	66302	270362	234322	67222	67222
refbc_13351_AF543726	558	65382	218742	80062	282266	243942	77062	77062
refbc_134033_AY042418	316	36170	178982	51262	218722	181718	48942	48942
refbc_134033_AY042419	316	36170	178982	51262	218722	181718	48942	48942
refbc_134033_AY042431	456	48942	207382	66302	252362	218722	60782	60782
refbc_134033_AY042432	456	48942	207382	66302	252362	218722	60782	60782
refbc_13429_EF590397	517	56342	218742	66302	270362	234322	67222	67222
refbc_13465_FJ395373	453	48942	207382	66302	252362	218722	60782	60782
refbc_13481_AY554072	173	21434	150582	24758	181718	144714	27122	27122
refbc_13521_AJ966797	197	27122	150582	24758	198538	164898	31486	31486
refbc_13525_AJ010515	386	41174	187502	51262	235542	198538	54662	54662
refbc_13525_AJ011444	281	31486	170462	35490	218722	181718	41174	41174
refbc_13525_FJ014087	450	48942	207382	66302	252362	218722	60782	60782
refbc_136217_FJ687421	223	27122	159102	30846	198538	164898	36170	36170
refbc_136222_HM016510	374	41174	187502	51262	235542	198538	54662	54662
refbc_136222_HM016511	360	41174	187502	51262	235542	198538	48942	48942
refbc_136224_FJ687422	214	27122	159102	24758	198538	164898	31486	31486
refbc_13654_FJ160853	194	27122	150582	24758	198538	164898	31486	31486
refbc_137093_AJ388230	234	27122	159102	30846	198538	164898	36170	36170
refbc_137093_AJ406325	385	41174	187502	51262	235542	198538	54662	54662
refbc_137093_AJ406354	234	27122	159102	30846	198538	164898	36170	36170
refbc_137095_AJ406326	351	41174	187502	51262	235542	198538	48942	48942
refbc_137095_AJ406355	307	36170	178982	51262	218722	181718	41174	41174
refbc_137096_AJ406327	364	41174	187502	51262	235542	198538	48942	48942
refbc_137096_AJ406356	277	31486	170462	35490	218722	181718	41174	41174
refbc_137098_AJ406330	351	41174	187502	51262	235542	198538	48942	48942
refbc_137098_AJ406358	307	36170	178982	51262	218722	181718	41174	41174
refbc_137100_AJ406331	385	41174	187502	51262	235542	198538	54662	54662
refbc_137100_AJ406359	277	31486	170462	35490	218722	181718	41174	41174
refbc_137101_AJ406332	351	41174	187502	51262	235542	198538	48942	48942
refbc_137101_AJ406360	308	36170	178982	51262	218722	181718	41174	41174
refbc_137103_AJ406333	351	41174	187502	51262	235542	198538	48942	48942
refbc_137103_AJ406361	307	36170	178982	51262	218722	181718	41174	41174
refbc_137104_AJ295332	351	41174	187502	51262	235542	198538	48942	48942
refbc_137104_AJ295333	263	31486	170462	35490	218722	181718	41174	41174
refbc_137106_AJ406334	351	41174	187502	51262	235542	198538	48942	48942
refbc_137106_AJ406362	307	36170	178982	51262	218722	181718	41174	41174
refbc_137111_AJ406336	351	41174	187502	51262	235542	198538	48942	48942
refbc_137111_AJ406364	307	36170	178982	51262	218722	181718	41174	41174
refbc_137112_AJ406337	351	41174	187502	51262	235542	198538	48942	48942
refbc_137112_AJ406365	308	36170	178982	51262	218722	181718	41174	41174
refbc_137113_AJ406338	386	41174	187502	51262	235542	198538	54662	54662
refbc_137113_AJ406366	277	31486	170462	35490	218722	181718	41174	41174
refbc_137115_AJ406339	351	41174	187502	51262	235542	198538	48942	48942
refbc_137115_AJ406367	307	36170	178982	51262	218722	181718	41174	41174
refbc_137116_AJ406340	351	41174	187502	51262	235542	198538	48942	48942
refbc_137116_AJ406368	307	36170	178982	51262	218722	181718	41174	41174
refbc_137117_AJ406341	351	41174	187502	51262	235542	198538	48942	48942
refbc_137117_AJ406369	307	36170	178982	51262	218722	181718	41174	41174
refbc_137118_AJ406342	351	41174	187502	51262	235542	198538	48942	48942
refbc_137118_AJ406370	308	36170	178982	51262	218722	181718	41174	41174
refbc_137120_AJ406343	351	41174	187502	51262	235542	198538	48942	48942
refbc_137120_AJ406371	308	36170	178982	51262	218722	181718	41174	41174
refbc_137121_AJ295336	351	41174	187502	51262	235542	198538	48942	48942
refbc_137121_AJ295337	263	31486	170462	35490	218722	181718	41174	41174
refbc_137122_AJ406344	351	41174	187502	51262	235542	198538	48942	48942
refbc_137122_AJ406372	307	36170	178982	51262	218722	181718	41174	41174
refbc_137128_AJ406347	360	41174	187502	51262	235542	198538	48942	48942
refbc_137128_AJ406375	277	31486	170462	35490	218722	181718	41174	41174
refbc_137129_AJ406348	366	41174	187502	51262	235542	198538	48942	48942
refbc_137129_AJ406376	277	31486	170462	35490	218722	181718	41174	41174
refbc_137130_AJ406349	383	41174	187502	51262	235542	198538	54662	54662
refbc_137130_AJ406377	277	31486	170462	35490	218722	181718	41174	41174
refbc_137131_AJ406350	385	41174	187502	51262	235542	198538	54662	54662
refbc_137131_AJ406378	277	31486	170462	35490	218722	181718	41174	41174
refbc_137132_AJ406351	367	41174	187502	51262	235542	198538	54662	54662
refbc_137132_AJ406379	263	31486	170462	35490	218722	181718	41174	41174
refbc_137133_AJ406352	387	41174	187502	51262	235542	198538	54662	54662
refbc_137133_AJ406380	281	31486	170462	35490	218722	181718	41174	41174
refbc_137456_EU914266	328	36170	178982	51262	235542	198538	48942	48942
refbc_137457_EU914267	349	41174	187502	51262	235542	198538	48942	48942
refbc_137671_EF653713	409	41174	198862	51262	235542	198538	54662	54662
refbc_137673_FJ154492	369	41174	187502	51262	235542	198538	54662	54662
refbc_137685_EF653726	410	41174	198862	51262	235542	198538	54662	54662
refbc_137685_EU196953	410	41174	198862	51262	235542	198538	54662	54662
refbc_137687_EF653730	410	41174	198862	51262	235542	198538	54662	54662
refbc_137688_EF653731	409	41174	198862	51262	235542	198538	54662	54662
refbc_137688_EU196955	404	41174	198862	51262	235542	198538	54662	54662
refbc_137689_EF653717	408	41174	198862	51262	235542	198538	54662	54662
refbc_137693_EF653710	361	41174	187502	51262	235542	198538	48942	48942
refbc_138053_EU812012	245	31486	170462	30846	198538	164898	36170	36170
refbc_138062_EU812011	240	31486	159102	30846	198538	164898	36170	36170
refbc_140998_AF487210	308	36170	178982	51262	218722	181718	41174	41174
refbc_140998_AF487211	308	36170	178982	51262	218722	181718	41174	41174
refbc_140998_AF487212	308	36170	178982	51262	218722	181718	41174	41174
refbc_141000_AF487203	308	36170	178982	51262	218722	181718	41174	41174
refbc_141009_AF487215	308	36170	178982	51262	218722	181718	41174	41174
refbc_141009_AF487216	308	36170	178982	51262	218722	181718	41174	41174
refbc_145754_EF590410	505	56342	207382	66302	261362	226522	67222	67222
refbc_146493_AJ388152	365	41174	187502	51262	235542	198538	48942	48942
refbc_146493_AJ388221	256	31486	170462	30846	198538	164898	36170	36170
refbc_147044_AF309239	427	48942	198862	66302	252362	218722	60782	60782
refbc_147045_AF309217	375	41174	187502	51262	235542	198538	54662	54662
refbc_147046_AF309237	427	48942	198862	66302	252362	218722	60782	60782
refbc_148620_AJ408022	273	31486	170462	35490	218722	181718	41174	41174
refbc_148620_AJ408029	386	41174	187502	51262	235542	198538	54662	54662
refbc_148621_AJ408023	292	36170	178982	35490	218722	181718	41174	41174
refbc_148621_AJ408030	377	41174	187502	51262	235542	198538	54662	54662
refbc_148622_AJ388164	386	41174	187502	51262	235542	198538	54662	54662
refbc_148622_AJ388234	299	36170	178982	35490	218722	181718	41174	41174
refbc_148623_AJ388168	386	41174	187502	51262	235542	198538	54662	54662
refbc_148623_AJ388238	290	36170	178982	35490	218722	181718	41174	41174
refbc_148624_AJ408024	283	31486	170462	35490	218722	181718	41174	41174
refbc_148624_AJ408031	395	41174	198862	51262	235542	198538	54662	54662
refbc_148625_AJ408025	283	31486	170462	35490	218722	181718	41174	41174
refbc_148625_AJ408032	382	41174	187502	51262	235542	198538	54662	54662
refbc_148626_AJ388191	386	41174	187502	51262	235542	198538	54662	54662
refbc_148626_AJ388261	275	31486	170462	35490	218722	181718	41174	41174
refbc_148627_AJ408026	292	36170	178982	35490	218722	181718	41174	41174
refbc_148627_AJ408033	376	41174	187502	51262	235542	198538	54662	54662
refbc_148628_AJ408027	272	31486	170462	35490	218722	181718	41174	41174
refbc_148628_AJ408034	384	41174	187502	51262	235542	198538	54662	54662
refbc_148629_AJ408028	292	36170	178982	35490	218722	181718	41174	41174
refbc_148629_AJ408035	383	41174	187502	51262	235542	198538	54662	54662
refbc_148672_EU812046	244	31486	170462	30846	198538	164898	36170	36170
refbc_149054_AJ388149	377	41174	187502	51262	235542	198538	54662	54662
refbc_149054_AJ388218	278	31486	170462	35490	218722	181718	41174	41174
refbc_149439_AF391734	174	21434	150582	24758	181718	144714	27122	27122
refbc_149439_AF391735	174	21434	150582	24758	181718	144714	27122	27122
refbc_149439_AF391736	173	21434	150582	24758	181718	144714	27122	27122
refbc_152711_AJ580607	156	21434	139222	20914	181718	144714	27122	27122
refbc_152717_AJ580611	166	21434	150582	20914	181718	144714	27122	27122
refbc_152723_AJ580619	213	27122	159102	24758	198538	164898	31486	31486
refbc_152744_AJ580625	485	56342	207382	66302	252362	218722	67222	67222
refbc_152744_AJ580626	308	36170	178982	51262	218722	181718	41174	41174
refbc_154340_AB086257	329	36170	178982	51262	235542	198538	48942	48942
refbc_154340_AB089713	329	36170	178982	51262	235542	198538	48942	48942
refbc_154543_AJ310067	577	65382	227262	80062	291986	252342	77062	77062
refbc_155433_AY492146	206	27122	159102	24758	198538	164898	31486	31486
refbc_157791_EU307310	597	65382	227262	80062	301706	260742	77062	77062
refbc_157791_EU307311	597	65382	227262	80062	301706	260742	77062	77062
refbc_160402_AY492161	207	27122	159102	24758	198538	164898	31486	31486
refbc_165312_AY492157	206	27122	159102	24758	198538	164898	31486	31486
refbc_165312_AY613180	206	27122	159102	24758	198538	164898	31486	31486
refbc_167378_AY042420	316	36170	178982	51262	218722	181718	48942	48942
refbc_167378_AY042433	456	48942	207382	66302	252362	218722	60782	60782
refbc_167424_AY042466	311	36170	178982	51262	218722	181718	41174	41174
refbc_167424_AY042467	311	36170	178982	51262	218722	181718	41174	41174
refbc_167661_AF547200	436	48942	198862	66302	252362	218722	60782	60782
refbc_167661_AF547202	469	48942	207382	66302	252362	218722	60782	60782
refbc_167666_AF547206	469	48942	207382	66302	252362	218722	60782	60782
refbc_167762_AY042397	428	48942	198862	66302	252362	218722	60782	60782
refbc_167762_AY042398	430	48942	198862	66302	252362	218722	60782	60782
refbc_168161_AY042483	357	41174	187502	51262	235542	198538	48942	48942
refbc_168161_AY042484	357	41174	187502	51262	235542	198538	48942	48942
refbc_168162_AY042458	311	36170	178982	51262	218722	181718	41174	41174
refbc_168162_AY042459	311	36170	178982	51262	218722	181718	41174	41174
refbc_168163_AY042462	311	36170	178982	51262	218722	181718	41174	41174
refbc_168163_AY042492	357	41174	187502	51262	235542	198538	48942	48942
refbc_168165_AY042424	316	36170	178982	51262	218722	181718	48942	48942
refbc_168165_AY042425	316	36170	178982	51262	218722	181718	48942	48942
refbc_168165_AY042437	456	48942	207382	66302	252362	218722	60782	60782
refbc_168165_AY042438	456	48942	207382	66302	252362	218722	60782	60782
refbc_168549_AF547204	456	48942	207382	66302	252362	218722	60782	60782
refbc_169214_AJ833672	460	48942	207382	66302	252362	218722	60782	60782
refbc_170372_AF391700	174	21434	150582	24758	181718	144714	27122	27122
refbc_170372_AF391701	174	21434	150582	24758	181718	144714	27122	27122
refbc_170372_AF391702	174	21434	150582	24758	181718	144714	27122	27122
refbc_170372_AF391703	174	21434	150582	24758	181718	144714	27122	27122
refbc_170373_AF391728	174	21434	150582	24758	181718	144714	27122	27122
refbc_170373_AF391729	174	21434	150582	24758	181718	144714	27122	27122
refbc_170373_AF391730	174	21434	150582	24758	181718	144714	27122	27122
refbc_170374_AF391754	174	21434	150582	24758	181718	144714	27122	27122
refbc_170374_AF391755	174	21434	150582	24758	181718	144714	27122	27122
refbc_170374_AF391756	174	21434	150582	24758	181718	144714	27122	27122
refbc_170375_AF391741	174	21434	150582	24758	181718	144714	27122	27122
refbc_170375_AF391742	174	21434	150582	24758	181718	144714	27122	27122
refbc_170375_AF391743	174	21434	150582	24758	181718	144714	27122	27122
refbc_170376_AF391737	174	21434	150582	24758	181718	144714	27122	27122
refbc_170376_AF391738	174	21434	150582	24758	181718	144714	27122	27122
refbc_170376_AF391739	174	21434	150582	24758	181718	144714	27122	27122
refbc_170376_AF391740	174	21434	150582	24758	181718	144714	27122	27122
refbc_170377_AF391744	174	21434	150582	24758	181718	144714	27122	27122
refbc_170377_AF391745	174	21434	150582	24758	181718	144714	27122	27122
refbc_170377_AF391746	174	21434	150582	24758	181718	144714	27122	27122
refbc_170377_AF391747	174	21434	150582	24758	181718	144714	27122	27122
refbc_170378_AF391748	174	21434	150582	24758	181718	144714	27122	27122
refbc_170378_AF391749	174	21434	150582	24758	181718	144714	27122	27122
refbc_170378_AF391750	174	21434	150582	24758	181718	144714	27122	27122
refbc_170379_AF391751	174	21434	150582	24758	181718	144714	27122	27122
refbc_170379_AF391752	174	21434	150582	24758	181718	144714	27122	27122
refbc_170379_AF391753	174	21434	150582	24758	181718	144714	27122	27122
refbc_170380_AF391719	174	21434	150582	24758	181718	144714	27122	27122
refbc_170380_AF391720	174	21434	150582	24758	181718	144714	27122	27122
refbc_170380_AF391721	174	21434	150582	24758	181718	144714	27122	27122
refbc_170382_AF391716	174	21434	150582	24758	181718	144714	27122	27122
refbc_170382_AF391717	174	21434	150582	24758	181718	144714	27122	27122
refbc_170382_AF391718	174	21434	150582	24758	181718	144714	27122	27122
refbc_170383_AF391710	174	21434	150582	24758	181718	144714	27122	27122
refbc_170383_AF391711	173	21434	150582	24758	181718	144714	27122	27122
refbc_170383_AF391712	174	21434	150582	24758	181718	144714	27122	27122
refbc_170384_AF391713	174	21434	150582	24758	181718	144714	27122	27122
refbc_170384_AF391714	174	21434	150582	24758	181718	144714	27122	27122
refbc_170384_AF391715	173	21434	150582	24758	181718	144714	27122	27122
refbc_170385_AF391707	174	21434	150582	24758	181718	144714	27122	27122
refbc_170385_AF391708	173	21434	150582	24758	181718	144714	27122	27122
refbc_170385_AF391709	173	21434	150582	24758	181718	144714	27122	27122
refbc_171250_AB071306	445	48942	198862	66302	252362	218722	60782	60782
refbc_171250_AB071310	445	48942	198862	66302	252362	218722	60782	60782
refbc_171250_AB071312	445	48942	198862	66302	252362	218722	60782	60782
refbc_171250_AB071315	445	48942	198862	66302	252362	218722	60782	60782
refbc_171251_AB071305	445	48942	198862	66302	252362	218722	60782	60782
refbc_171251_AM910374	505	56342	207382	66302	261362	226522	67222	67222
refbc_171886_AM889711	532	56342	218742	66302	270362	234322	77062	77062
refbc_171887_AM889712	532	56342	218742	66302	270362	234322	77062	77062
refbc_174188_AB494683	351	41174	187502	51262	235542	198538	48942	48942
refbc_174467_AY554054	178	21434	150582	24758	181718	144714	27122	27122
refbc_175391_AY708036	512	56342	218742	66302	261362	226522	67222	67222
refbc_180557_AF446924	506	56342	207382	66302	261362	226522	67222	67222
refbc_182372_DQ860378	155	21434	139222	20914	181718	144714	27122	27122
refbc_182806_AF391695	174	21434	150582	24758	181718	144714	27122	27122
refbc_182806_AF391696	174	21434	150582	24758	181718	144714	27122	27122
refbc_182806_AF391697	174	21434	150582	24758	181718	144714	27122	27122
refbc_182806_AF467128	174	21434	150582	24758	181718	144714	27122	27122
refbc_182806_AF467129	174	21434	150582	24758	181718	144714	27122	27122
refbc_182806_AF467131	174	21434	150582	24758	181718	144714	27122	27122
refbc_182806_AF467132	174	21434	150582	24758	181718	144714	27122	27122
refbc_182806_AF467133	174	21434	150582	24758	181718	144714	27122	27122
refbc_182806_AF467134	174	21434	150582	24758	181718	144714	27122	27122
refbc_182806_AF467136	174	21434	150582	24758	181718	144714	27122	27122
refbc_182806_AF467137	174	21434	150582	24758	181718	144714	27122	27122
refbc_182806_AF467138	173	21434	150582	24758	181718	144714	27122	27122
refbc_182806_AF467139	174	21434	150582	24758	181718	144714	27122	27122
refbc_182806_AF467140	174	21434	150582	24758	181718	144714	27122	27122
refbc_182806_AF467141	174	21434	150582	24758	181718	144714	27122	27122
refbc_182806_AF467143	173	21434	150582	24758	181718	144714	27122	27122
refbc_182806_AF467144	174	21434	150582	24758	181718	144714	27122	27122
refbc_182806_AF467148	174	21434	150582	24758	181718	144714	27122	27122
refbc_182806_AF467150	174	21434	150582	24758	181718	144714	27122	27122
refbc_182806_AF467151	174	21434	150582	24758	181718	144714	27122	27122
refbc_182806_AF467154	174	21434	150582	24758	181718	144714	27122	27122
refbc_182806_AF467155	174	21434	150582	24758	181718	144714	27122	27122
refbc_182806_AF467156	173	21434	150582	24758	181718	144714	27122	27122
refbc_182806_AF467157	174	21434	150582	24758	181718	144714	27122	27122
refbc_182806_AF467158	174	21434	150582	24758	181718	144714	27122	27122
refbc_182806_AF467160	174	21434	150582	24758	181718	144714	27122	27122
refbc_182806_AF467161	174	21434	150582	24758	181718	144714	27122	27122
refbc_182807_AF391731	174	21434	150582	24758	181718	144714	27122	27122
refbc_182807_AF391732	174	21434	150582	24758	181718	144714	27122	27122
refbc_182807_AF391733	173	21434	150582	24758	181718	144714	27122	27122
refbc_182808_AF391704	174	21434	150582	24758	181718	144714	27122	27122
refbc_182808_AF391705	174	21434	150582	24758	181718	144714	27122	27122
refbc_182808_AF391706	174	21434	150582	24758	181718	144714	27122	27122
refbc_182809_AF391725	174	21434	150582	24758	181718	144714	27122	27122
refbc_182809_AF391726	174	21434	150582	24758	181718	144714	27122	27122
refbc_182809_AF391727	174	21434	150582	24758	181718	144714	27122	27122
refbc_182810_AF391722	174	21434	150582	24758	181718	144714	27122	27122
refbc_182810_AF391723	173	21434	150582	24758	181718	144714	27122	27122
refbc_182810_AF391724	174	21434	150582	24758	181718	144714	27122	27122
refbc_182811_AF391698	174	21434	150582	24758	181718	144714	27122	27122
refbc_182811_AF391699	174	21434	150582	24758	181718	144714	27122	27122
refbc_182812_AF391692	174	21434	150582	24758	181718	144714	27122	27122
refbc_182812_AF391693	174	21434	150582	24758	181718	144714	27122	27122
refbc_182812_AF391694	174	21434	150582	24758	181718	144714	27122	27122
refbc_182812_AF467127	174	21434	150582	24758	181718	144714	27122	27122
refbc_182812_AF467130	174	21434	150582	24758	181718	144714	27122	27122
refbc_182812_AF467135	174	21434	150582	24758	181718	144714	27122	27122
refbc_182812_AF467142	174	21434	150582	24758	181718	144714	27122	27122
refbc_182812_AF467145	174	21434	150582	24758	181718	144714	27122	27122
refbc_182812_AF467146	174	21434	150582	24758	181718	144714	27122	27122
refbc_182812_AF467147	173	21434	150582	24758	181718	144714	27122	27122
refbc_182812_AF467149	174	21434	150582	24758	181718	144714	27122	27122
refbc_182812_AF467152	174	21434	150582	24758	181718	144714	27122	27122
refbc_182812_AF467153	174	21434	150582	24758	181718	144714	27122	27122
refbc_182812_AF467159	174	21434	150582	24758	181718	144714	27122	27122
refbc_182812_AF467162	173	21434	150582	24758	181718	144714	27122	27122
refbc_184046_FJ197263	266	31486	170462	35490	218722	181718	41174	41174
refbc_185301_AB079428	581	65382	227262	80062	291986	252342	77062	77062
refbc_185301_AB079429	581	65382	227262	80062	291986	252342	77062	77062
refbc_185301_AB079430	581	65382	227262	80062	291986	252342	77062	77062
refbc_185301_AB079431	581	65382	227262	80062	291986	252342	77062	77062
refbc_185301_AB079432	581	65382	227262	80062	291986	252342	77062	77062
refbc_185301_AB079433	581	65382	227262	80062	291986	252342	77062	77062
refbc_185542_EF590404	460	48942	207382	66302	252362	218722	60782	60782
refbc_189238_AF460009	355	41174	187502	51262	235542	198538	48942	48942
refbc_189456_AB494685	351	41174	187502	51262	235542	198538	48942	48942
refbc_190006_AF487208	308	36170	178982	51262	218722	181718	41174	41174
refbc_190006_AF487209	308	36170	178982	51262	218722	181718	41174	41174
refbc_190007_AF487213	308	36170	178982	51262	218722	181718	41174	41174
refbc_190007_AF487214	308	36170	178982	51262	218722	181718	41174	41174
refbc_190009_AF487217	308	36170	178982	51262	218722	181718	41174	41174
refbc_190009_AF487218	308	36170	178982	51262	218722	181718	41174	41174
refbc_190010_AF487219	308	36170	178982	51262	218722	181718	41174	41174
refbc_190010_AF487220	308	36170	178982	51262	218722	181718	41174	41174
refbc_192043_AY140315	510	56342	207382	66302	261362	226522	67222	67222
refbc_197592_AB494679	351	41174	187502	51262	235542	198538	48942	48942
refbc_197598_DQ536110	350	41174	187502	51262	235542	198538	48942	48942
refbc_197598_DQ536111	350	41174	187502	51262	235542	198538	48942	48942
refbc_197599_DQ536108	350	41174	187502	51262	235542	198538	48942	48942
refbc_197599_DQ536109	350	41174	187502	51262	235542	198538	48942	48942
refbc_197660_AJ388145	358	41174	187502	51262	235542	198538	48942	48942
refbc_197660_AJ388214	281	31486	170462	35490	218722	181718	41174	41174
refbc_197662_AJ388147	382	41174	187502	51262	235542	198538	54662	54662
refbc_197662_AJ388216	281	31486	170462	35490	218722	181718	41174	41174
refbc_197664_AJ388172	362	41174	187502	51262	235542	198538	48942	48942
refbc_197664_AJ388242	281	31486	170462	35490	218722	181718	41174	41174
refbc_197665_AJ388173	352	41174	187502	51262	235542	198538	48942	48942
refbc_197665_AJ388243	281	31486	170462	35490	218722	181718	41174	41174
refbc_197666_AJ388174	386	41174	187502	51262	235542	198538	54662	54662
refbc_197666_AJ388244	290	36170	178982	35490	218722	181718	41174	41174
refbc_197668_AJ388178	386	41174	187502	51262	235542	198538	54662	54662
refbc_197668_AJ388248	277	31486	170462	35490	218722	181718	41174	41174
refbc_198816_FJ197239	264	31486	170462	35490	218722	181718	41174	41174
refbc_198817_FJ197240	265	31486	170462	35490	218722	181718	41174	41174
refbc_198818_FJ197241	265	31486	170462	35490	218722	181718	41174	41174
refbc_198823_FJ197249	227	27122	159102	30846	198538	164898	36170	36170
refbc_198824_FJ197250	281	31486	170462	35490	218722	181718	41174	41174
refbc_198829_FJ197262	264	31486	170462	35490	218722	181718	41174	41174
refbc_199222_AB494680	351	41174	187502	51262	235542	198538	48942	48942
refbc_199404_AY259811	560	65382	218742	80062	282266	243942	77062	77062
refbc_199404_AY259812	560	65382	218742	80062	282266	243942	77062	77062
refbc_199404_AY259813	560	65382	218742	80062	282266	243942	77062	77062
refbc_199404_AY259814	560	65382	218742	80062	282266	243942	77062	77062
refbc_202878_FJ197227	281	31486	170462	35490	218722	181718	41174	41174
refbc_202879_FJ197259	263	31486	170462	35490	218722	181718	41174	41174
refbc_202880_FJ197233	263	31486	170462	35490	218722	181718	41174	41174
refbc_202882_FJ197234	263	31486	170462	35490	218722	181718	41174	41174
refbc_202883_FJ197235	263	31486	170462	35490	218722	181718	41174	41174
refbc_202885_FJ197256	263	31486	170462	35490	218722	181718	41174	41174
refbc_202887_FJ197257	263	31486	170462	35490	218722	181718	41174	41174
refbc_202906_AB494678	351	41174	187502	51262	235542	198538	48942	48942
refbc_203002_FJ794276	492	56342	207382	66302	252362	218722	67222	67222
refbc_203002_FJ794277	492	56342	207382	66302	252362	218722	67222	67222
refbc_203002_FJ794278	492	56342	207382	66302	252362	218722	67222	67222
refbc_203002_FJ794279	492	56342	207382	66302	252362	218722	67222	67222
refbc_203002_FJ794280	492	56342	207382	66302	252362	218722	67222	67222
refbc_203002_FJ794281	492	56342	207382	66302	252362	218722	67222	67222
refbc_203002_FJ794282	492	56342	207382	66302	252362	218722	67222	67222
refbc_203002_FJ794283	492	56342	207382	66302	252362	218722	67222	67222
refbc_203002_FJ794284	492	56342	207382	66302	252362	218722	67222	67222
refbc_203002_FJ794285	492	56342	207382	66302	252362	218722	67222	67222
refbc_203002_FJ794286	492	56342	207382	66302	252362	218722	67222	67222
refbc_203002_FJ794287	492	56342	207382	66302	252362	218722	67222	67222
refbc_203002_FJ794288	492	56342	207382	66302	252362	218722	67222	67222
refbc_203002_FJ794289	492	56342	207382	66302	252362	218722	67222	67222
refbc_203002_FJ794290	492	56342	207382	66302	252362	218722	67222	67222
refbc_203002_FJ794291	492	56342	207382	66302	252362	218722	67222	67222
refbc_203002_FJ794292	247	31486	170462	30846	198538	164898	36170	36170
refbc_203002_FJ794293	247	31486	170462	30846	198538	164898	36170	36170
refbc_203002_FJ794294	247	31486	170462	30846	198538	164898	36170	36170
refbc_203002_FJ794295	247	31486	170462	30846	198538	164898	36170	36170
refbc_203002_FJ794296	247	31486	170462	30846	198538	164898	36170	36170
refbc_203002_FJ794297	247	31486	170462	30846	198538	164898	36170	36170
refbc_203002_FJ794298	247	31486	170462	30846	198538	164898	36170	36170
refbc_203002_FJ794299	247	31486	170462	30846	198538	164898	36170	36170
refbc_203002_FJ794300	247	31486	170462	30846	198538	164898	36170	36170
refbc_203002_FJ794301	247	31486	170462	30846	198538	164898	36170	36170
refbc_203002_FJ794302	247	31486	170462	30846	198538	164898	36170	36170
refbc_203002_FJ794303	247	31486	170462	30846	198538	164898	36170	36170
refbc_203002_FJ794304	247	31486	170462	30846	198538	164898	36170	36170
refbc_203002_FJ794305	247	31486	170462	30846	198538	164898	36170	36170
refbc_203002_FJ794306	247	31486	170462	30846	198538	164898	36170	36170
refbc_203002_FJ794307	247	31486	170462	30846	198538	164898	36170	36170
refbc_203008_FJ974032	486	56342	207382	66302	252362	218722	67222	67222
refbc_203008_FJ974034	247	31486	170462	30846	198538	164898	36170	36170
refbc_203015_FJ974031	492	56342	207382	66302	252362	218722	67222	67222
refbc_203015_FJ974033	247	31486	170462	30846	198538	164898	36170	36170
refbc_204382_AY492143	215	27122	159102	30846	198538	164898	31486	31486
refbc_205067_EU812039	228	27122	159102	30846	198538	164898	36170	36170
refbc_207932_EF434656	441	48942	198862	66302	252362	218722	60782	60782
refbc_207932_EF434657	441	48942	198862	66302	252362	218722	60782	60782
refbc_207932_EF434658	441	48942	198862	66302	252362	218722	60782	60782
refbc_207932_EF434659	441	48942	198862	66302	252362	218722	60782	60782
refbc_207932_EF434660	441	48942	198862	66302	252362	218722	60782	60782
refbc_207932_EF434661	441	48942	198862	66302	252362	218722	60782	60782
refbc_207932_EF434662	441	48942	198862	66302	252362	218722	60782	60782
refbc_207932_EF434663	441	48942	198862	66302	252362	218722	60782	60782
refbc_207932_EF434664	441	48942	198862	66302	252362	218722	60782	60782
refbc_207932_EF434665	391	41174	198862	51262	235542	198538	54662	54662
refbc_207932_EF434666	441	48942	198862	66302	252362	218722	60782	60782
refbc_207932_EF434667	441	48942	198862	66302	252362	218722	60782	60782
refbc_207932_EF434668	441	48942	198862	66302	252362	218722	60782	60782
refbc_207932_EF434669	441	48942	198862	66302	252362	218722	60782	60782
refbc_207932_EF434670	441	48942	198862	66302	252362	218722	60782	60782
refbc_207932_EF434671	289	31486	178982	35490	218722	181718	41174	41174
refbc_207932_EF434672	441	48942	198862	66302	252362	218722	60782	60782
refbc_207932_EF434673	441	48942	198862	66302	252362	218722	60782	60782
refbc_207932_EF434674	441	48942	198862	66302	252362	218722	60782	60782
refbc_207932_EF434675	441	48942	198862	66302	252362	218722	60782	60782
refbc_207932_EF434676	441	48942	198862	66302	252362	218722	60782	60782
refbc_207932_EF434677	441	48942	198862	66302	252362	218722	60782	60782
refbc_207932_EF434678	441	48942	198862	66302	252362	218722	60782	60782
refbc_207932_EF434679	441	48942	198862	66302	252362	218722	60782	60782
refbc_207932_EF434680	441	48942	198862	66302	252362	218722	60782	60782
refbc_207932_EF434681	441	48942	198862	66302	252362	218722	60782	60782
refbc_207932_EF434682	441	48942	198862	66302	252362	218722	60782	60782
refbc_207932_EF434683	441	48942	198862	66302	252362	218722	60782	60782
refbc_207932_EF434684	441	48942	198862	66302	252362	218722	60782	60782
refbc_207932_EF434685	441	48942	198862	66302	252362	218722	60782	60782
refbc_207932_EF434686	441	48942	198862	66302	252362	218722	60782	60782
refbc_207932_EF434687	441	48942	198862	66302	252362	218722	60782	60782
refbc_207932_EF434688	441	48942	198862	66302	252362	218722	60782	60782
refbc_207932_EF434689	441	48942	198862	66302	252362	218722	60782	60782
refbc_207932_EF434690	441	48942	198862	66302	252362	218722	60782	60782
refbc_207932_EF434691	441	48942	198862	66302	252362	218722	60782	60782
refbc_207932_EF434692	441	48942	198862	66302	252362	218722	60782	60782
refbc_207932_EF434693	441	48942	198862	66302	252362	218722	60782	60782
refbc_207932_EF434694	441	48942	198862	66302	252362	218722	60782	60782
refbc_207932_EF434695	441	48942	198862	66302	252362	218722	60782	60782
refbc_207932_EF434696	441	48942	198862	66302	252362	218722	60782	60782
refbc_207932_EF434697	441	48942	198862	66302	252362	218722	60782	60782
refbc_207932_EF434698	441	48942	198862	66302	252362	218722	60782	60782
refbc_207932_EF434699	407	41174	198862	51262	235542	198538	54662	54662
refbc_207932_EF434700	441	48942	198862	66302	252362	218722	60782	60782
refbc_207932_EF434701	441	48942	198862	66302	252362	218722	60782	60782
refbc_207932_EF434702	441	48942	198862	66302	252362	218722	60782	60782
refbc_207932_EF434703	441	48942	198862	66302	252362	218722	60782	60782
refbc_207932_EF434704	441	48942	198862	66302	252362	218722	60782	60782
refbc_21020_AY042421	316	36170	178982	51262	218722	181718	48942	48942
refbc_21020_AY042422	316	36170	178982	51262	218722	181718	48942	48942
refbc_21020_AY042423	316	36170	178982	51262	218722	181718	48942	48942
refbc_21020_AY042434	456	48942	207382	66302	252362	218722	60782	60782
refbc_21020_AY042435	456	48942	207382	66302	252362	218722	60782	60782
refbc_21020_AY042436	409	41174	198862	51262	235542	198538	54662	54662
refbc_210930_AJ512342	337	36170	187502	51262	235542	198538	48942	48942
refbc_210930_AJ512343	281	31486	170462	35490	218722	181718	41174	41174
refbc_212056_AY498549	590	65382	227262	80062	291986	252342	77062	77062
refbc_212295_GQ463906	196	27122	150582	24758	198538	164898	31486	31486
refbc_212310_FJ652146	464	48942	207382	66302	252362	218722	60782	60782
refbc_212733_GQ248082	537	56342	218742	66302	272546	235542	77062	77062
refbc_213013_FJ652147	464	48942	207382	66302	252362	218722	60782	60782
refbc_213017_FJ652116	464	48942	207382	66302	252362	218722	60782	60782
refbc_213017_FJ652117	464	48942	207382	66302	252362	218722	60782	60782
refbc_213017_FJ652118	464	48942	207382	66302	252362	218722	60782	60782
refbc_213017_FJ652119	464	48942	207382	66302	252362	218722	60782	60782
refbc_213017_FJ652120	464	48942	207382	66302	252362	218722	60782	60782
refbc_213017_FJ652121	464	48942	207382	66302	252362	218722	60782	60782
refbc_213017_FJ652122	464	48942	207382	66302	252362	218722	60782	60782
refbc_213017_FJ652123	464	48942	207382	66302	252362	218722	60782	60782
refbc_213017_FJ652124	464	48942	207382	66302	252362	218722	60782	60782
refbc_213017_FJ652125	464	48942	207382	66302	252362	218722	60782	60782
refbc_213017_FJ652126	464	48942	207382	66302	252362	218722	60782	60782
refbc_213017_FJ652127	464	48942	207382	66302	252362	218722	60782	60782
refbc_213017_FJ652128	464	48942	207382	66302	252362	218722	60782	60782
refbc_213017_FJ652129	464	48942	207382	66302	252362	218722	60782	60782
refbc_213017_FJ652130	464	48942	207382	66302	252362	218722	60782	60782
refbc_213017_FJ652131	464	48942	207382	66302	252362	218722	60782	60782
refbc_213017_FJ652132	464	48942	207382	66302	252362	218722	60782	60782
refbc_213017_FJ652133	464	48942	207382	66302	252362	218722	60782	60782
refbc_213017_FJ652134	464	48942	207382	66302	252362	218722	60782	60782
refbc_213017_FJ652135	464	48942	207382	66302	252362	218722	60782	60782
refbc_213017_FJ652136	464	48942	207382	66302	252362	218722	60782	60782
refbc_213017_FJ652137	464	48942	207382	66302	252362	218722	60782	60782
refbc_213017_FJ652138	464	48942	207382	66302	252362	218722	60782	60782
refbc_213017_FJ652139	464	48942	207382	66302	252362	218722	60782	60782
refbc_213017_FJ652140	464	48942	207382	66302	252362	218722	60782	60782
refbc_213017_FJ652141	464	48942	207382	66302	252362	218722	60782	60782
refbc_213017_FJ652142	464	48942	207382	66302	252362	218722	60782	60782
refbc_213017_FJ652143	464	48942	207382	66302	252362	218722	60782	60782
refbc_213017_FJ652144	464	48942	207382	66302	252362	218722	60782	60782
refbc_213017_FJ652145	464	48942	207382	66302	252362	218722	60782	60782
refbc_215581_GU135041	532	56342	218742	66302	270362	234322	77062	77062
refbc_217319_AY213096	507	56342	207382	66302	261362	226522	67222	67222
refbc_217322_AY213100	508	56342	207382	66302	261362	226522	67222	67222
refbc_217332_AY213112	508	56342	207382	66302	261362	226522	67222	67222
refbc_217332_AY232631	508	56342	207382	66302	261362	226522	67222	67222
refbc_217333_AY213113	508	56342	207382	66302	261362	226522	67222	67222
refbc_217333_AY213114	508	56342	207382	66302	261362	226522	67222	67222
refbc_217333_AY213115	508	56342	207382	66302	261362	226522	67222	67222
refbc_217334_AY213116	508	56342	207382	66302	261362	226522	67222	67222
refbc_217334_AY232632	508	56342	207382	66302	261362	226522	67222	67222
refbc_217341_AY213123	501	56342	207382	66302	261362	226522	67222	67222
refbc_217341_AY232633	508	56342	207382	66302	261362	226522	67222	67222
refbc_217344_AY213110	508	56342	207382	66302	261362	226522	67222	67222
refbc_217344_AY232634	508	56342	207382	66302	261362	226522	67222	67222
refbc_217349_AY213129	508	56342	207382	66302	261362	226522	67222	67222
refbc_217349_AY232635	508	56342	207382	66302	261362	226522	67222	67222
refbc_217354_AY213133	508	56342	207382	66302	261362	226522	67222	67222
refbc_217354_AY232636	508	56342	207382	66302	261362	226522	67222	67222
refbc_217356_AY213135	499	56342	207382	66302	261362	226522	67222	67222
refbc_217356_AY232637	508	56342	207382	66302	261362	226522	67222	67222
refbc_22294_FJ786736	357	41174	187502	51262	235542	198538	48942	48942
refbc_224733_EF395575	455	48942	207382	66302	252362	218722	60782	60782
refbc_224733_EF395576	455	48942	207382	66302	252362	218722	60782	60782
refbc_225354_FN674489	303	36170	178982	35490	218722	181718	41174	41174
refbc_225354_FN674490	303	36170	178982	35490	218722	181718	41174	41174
refbc_225354_FN674491	303	36170	178982	35490	218722	181718	41174	41174
refbc_225355_FN674503	303	36170	178982	35490	218722	181718	41174	41174
refbc_225355_FN674504	303	36170	178982	35490	218722	181718	41174	41174
refbc_225355_FN674505	303	36170	178982	35490	218722	181718	41174	41174
refbc_227242_AB494682	351	41174	187502	51262	235542	198538	48942	48942
refbc_227254_AB494671	351	41174	187502	51262	235542	198538	48942	48942
refbc_227255_AB494652	351	41174	187502	51262	235542	198538	48942	48942
refbc_227256_AB494669	351	41174	187502	51262	235542	198538	48942	48942
refbc_227257_AB494659	351	41174	187502	51262	235542	198538	48942	48942
refbc_227502_AB494676	351	41174	187502	51262	235542	198538	48942	48942
refbc_227504_AB494668	363	41174	187502	51262	235542	198538	48942	48942
refbc_227505_AB494664	351	41174	187502	51262	235542	198538	48942	48942
refbc_228855_AB494654	351	41174	187502	51262	235542	198538	48942	48942
refbc_228856_AB494657	351	41174	187502	51262	235542	198538	48942	48942
refbc_228857_AB494658	351	41174	187502	51262	235542	198538	48942	48942
refbc_230572_AY708007	512	56342	218742	66302	261362	226522	67222	67222
refbc_231913_AY625051	392	41174	198862	51262	235542	198538	54662	54662
refbc_233671_GQ981965	514	56342	218742	66302	261362	226522	67222	67222
refbc_235900_AY312236	162	21434	150582	20914	181718	144714	27122	27122
refbc_235900_AY312237	162	21434	150582	20914	181718	144714	27122	27122
refbc_235900_AY312238	162	21434	150582	20914	181718	144714	27122	27122
refbc_235900_AY312239	162	21434	150582	20914	181718	144714	27122	27122
refbc_235900_AY312240	162	21434	150582	20914	181718	144714	27122	27122
refbc_235900_AY312241	162	21434	150582	20914	181718	144714	27122	27122
refbc_235900_AY312242	162	21434	150582	20914	181718	144714	27122	27122
refbc_236224_AY259804	563	65382	218742	80062	282266	243942	77062	77062
refbc_236224_AY259805	563	65382	218742	80062	282266	243942	77062	77062
refbc_236232_AY259816	560	65382	218742	80062	282266	243942	77062	77062
refbc_236232_AY259817	560	65382	218742	80062	282266	243942	77062	77062
refbc_236232_AY259818	560	65382	218742	80062	282266	243942	77062	77062
refbc_236335_AY259826	560	65382	218742	80062	282266	243942	77062	77062
refbc_236335_AY259827	560	65382	218742	80062	282266	243942	77062	77062
refbc_237952_AY265188	443	48942	198862	66302	252362	218722	60782	60782
refbc_237952_AY265194	443	48942	198862	66302	252362	218722	60782	60782
refbc_237959_AY265198	443	48942	198862	66302	252362	218722	60782	60782
refbc_237960_AY265199	443	48942	198862	66302	252362	218722	60782	60782
refbc_237960_EF490254	443	48942	198862	66302	252362	218722	60782	60782
refbc_238532_AJ580602	377	41174	187502	51262	235542	198538	54662	54662
refbc_238532_AJ580603	579	65382	227262	80062	291986	252342	77062	77062
refbc_238532_AJ580762	401	41174	198862	51262	235542	198538	54662	54662
refbc_238533_AJ580608	399	41174	198862	51262	235542	198538	54662	54662
refbc_238535_AJ580613	229	27122	159102	30846	198538	164898	36170	36170
refbc_238539_AJ580631	162	21434	150582	20914	181718	144714	27122	27122
refbc_240009_AJ833653	512	56342	218742	66302	261362	226522	67222	67222
refbc_240009_AJ833654	512	56342	218742	66302	261362	226522	67222	67222
refbc_240009_AJ833655	512	56342	218742	66302	261362	226522	67222	67222
refbc_240009_AJ833656	512	56342	218742	66302	261362	226522	67222	67222
refbc_240009_AJ833657	512	56342	218742	66302	261362	226522	67222	67222
refbc_240009_AJ833658	512	56342	218742	66302	261362	226522	67222	67222
refbc_240009_AJ833659	512	56342	218742	66302	261362	226522	67222	67222
refbc_254057_EF590405	491	56342	207382	66302	252362	218722	67222	67222
refbc_254780_EF653724	410	41174	198862	51262	235542	198538	54662	54662
refbc_254780_EF653725	410	41174	198862	51262	235542	198538	54662	54662
refbc_256094_FJ160832	179	21434	150582	24758	181718	144714	31486	31486
refbc_256485_DQ657834	347	36170	187502	51262	235542	198538	48942	48942
refbc_260279_EU049348	481	56342	207382	66302	252362	218722	60782	60782
refbc_260996_EF590412	507	56342	207382	66302	261362	226522	67222	67222
refbc_261535_EU527828	469	48942	207382	66302	252362	218722	60782	60782
refbc_263974_AY492129	215	27122	159102	30846	198538	164898	31486	31486
refbc_263982_AY492165	221	27122	159102	30846	198538	164898	31486	31486
refbc_266785_AY555435	308	36170	178982	51262	218722	181718	41174	41174
refbc_266785_AY555436	308	36170	178982	51262	218722	181718	41174	41174
refbc_266786_AY555438	308	36170	178982	51262	218722	181718	41174	41174
refbc_266786_AY555439	308	36170	178982	51262	218722	181718	41174	41174
refbc_270419_FJ404867	572	65382	218742	80062	282266	243942	77062	77062
refbc_2711_AB071321	445	48942	198862	66302	252362	218722	60782	60782
refbc_2711_AB071323	445	48942	198862	66302	252362	218722	60782	60782
refbc_271558_FJ404828	563	65382	218742	80062	282266	243942	77062	77062
refbc_279240_AY625031	392	41174	198862	51262	235542	198538	54662	54662
refbc_279240_AY625033	392	41174	198862	51262	235542	198538	54662	54662
refbc_279256_AY625053	398	41174	198862	51262	235542	198538	54662	54662
refbc_284492_EU812054	253	31486	170462	30846	198538	164898	36170	36170
refbc_28503_EF490239	443	48942	198862	66302	252362	218722	60782	60782
refbc_288271_AY944608	159	21434	139222	20914	181718	144714	27122	27122
refbc_288271_GU045793	159	21434	139222	20914	181718	144714	27122	27122
refbc_288271_GU045794	159	21434	139222	20914	181718	144714	27122	27122
refbc_288271_GU045795	159	21434	139222	20914	181718	144714	27122	27122
refbc_288271_GU045796	159	21434	139222	20914	181718	144714	27122	27122
refbc_288272_AY944628	159	21434	139222	20914	181718	144714	27122	27122
refbc_288272_GU045805	159	21434	139222	20914	181718	144714	27122	27122
refbc_288272_GU045806	159	21434	139222	20914	181718	144714	27122	27122
refbc_288272_GU045807	159	21434	139222	20914	181718	144714	27122	27122
refbc_288299_AY944629	159	21434	139222	20914	181718	144714	27122	27122
refbc_288299_GU045819	159	21434	139222	20914	181718	144714	27122	27122
refbc_288300_AY944630	159	21434	139222	20914	181718	144714	27122	27122
refbc_288300_GU045820	159	21434	139222	20914	181718	144714	27122	27122
refbc_28929_AY042392	430	48942	198862	66302	252362	218722	60782	60782
refbc_28929_AY042399	430	48942	198862	66302	252362	218722	60782	60782
refbc_28974_FJ670048	545	56342	218742	66302	272546	235542	77062	77062
refbc_292282_AY708011	500	56342	207382	66302	261362	226522	67222	67222
refbc_292283_AY708012	515	56342	218742	66302	270362	234322	67222	67222
refbc_292284_AY708014	512	56342	218742	66302	261362	226522	67222	67222
refbc_292285_AY708015	515	56342	218742	66302	270362	234322	67222	67222
refbc_292285_AY708016	515	56342	218742	66302	270362	234322	67222	67222
refbc_292286_AY708017	515	56342	218742	66302	270362	234322	67222	67222
refbc_292287_AY708018	515	56342	218742	66302	270362	234322	67222	67222
refbc_292288_AY708020	515	56342	218742	66302	270362	234322	67222	67222
refbc_292289_AY708021	515	56342	218742	66302	270362	234322	67222	67222
refbc_292290_AY708022	515	56342	218742	66302	270362	234322	67222	67222
refbc_292292_AY708024	515	56342	218742	66302	270362	234322	67222	67222
refbc_292294_AY708030	515	56342	218742	66302	270362	234322	67222	67222
refbc_292295_AY708031	515	56342	218742	66302	270362	234322	67222	67222
refbc_292296_AY708032	515	56342	218742	66302	270362	234322	67222	67222
refbc_292297_AY708034	521	56342	218742	66302	270362	234322	67222	67222
refbc_292298_AY708035	515	56342	218742	66302	270362	234322	67222	67222
refbc_292299_AY708037	515	56342	218742	66302	270362	234322	67222	67222
refbc_292300_AY708038	515	56342	218742	66302	270362	234322	67222	67222
refbc_292301_AY708040	515	56342	218742	66302	270362	234322	67222	67222
refbc_292302_AY708041	515	56342	218742	66302	270362	234322	67222	67222
refbc_292303_AY708042	515	56342	218742	66302	270362	234322	67222	67222
refbc_292304_AY708043	515	56342	218742	66302	270362	234322	67222	67222
refbc_292305_AY708045	515	56342	218742	66302	270362	234322	67222	67222
refbc_292306_AY708046	515	56342	218742	66302	270362	234322	67222	67222
refbc_292312_AY613156	206	27122	159102	24758	198538	164898	31486	31486
refbc_292312_AY613157	206	27122	159102	24758	198538	164898	31486	31486
refbc_292312_AY613158	206	27122	159102	24758	198538	164898	31486	31486
refbc_292312_AY613159	206	27122	159102	24758	198538	164898	31486	31486
refbc_292323_AY613170	206	27122	159102	24758	198538	164898	31486	31486
refbc_292323_AY613171	206	27122	159102	24758	198538	164898	31486	31486
refbc_292331_AY613163	206	27122	159102	24758	198538	164898	31486	31486
refbc_292331_AY613172	206	27122	159102	24758	198538	164898	31486	31486
refbc_292331_AY613173	206	27122	159102	24758	198538	164898	31486	31486
refbc_292331_AY613178	206	27122	159102	24758	198538	164898	31486	31486
refbc_292331_AY613179	206	27122	159102	24758	198538	164898	31486	31486
refbc_292333_AY613181	206	27122	159102	24758	198538	164898	31486	31486
refbc_292333_AY613182	206	27122	159102	24758	198538	164898	31486	31486
refbc_292339_AY613188	206	27122	159102	24758	198538	164898	31486	31486
refbc_292339_AY613189	206	27122	159102	24758	198538	164898	31486	31486
refbc_292339_AY613190	206	27122	159102	24758	198538	164898	31486	31486
refbc_292339_AY613191	205	27122	159102	24758	198538	164898	31486	31486
refbc_292352_AJ833651	413	48942	198862	51262	235542	198538	54662	54662
refbc_292352_AJ833652	461	48942	207382	66302	252362	218722	60782	60782
refbc_292353_AJ833660	461	48942	207382	66302	252362	218722	60782	60782
refbc_292353_AJ833661	461	48942	207382	66302	252362	218722	60782	60782
refbc_292353_AJ833662	461	48942	207382	66302	252362	218722	60782	60782
refbc_292353_AJ833663	449	48942	207382	66302	252362	218722	60782	60782
refbc_292354_AJ833664	460	48942	207382	66302	252362	218722	60782	60782
refbc_292354_AJ833665	460	48942	207382	66302	252362	218722	60782	60782
refbc_292357_AJ833668	461	48942	207382	66302	252362	218722	60782	60782
refbc_292357_AJ833669	461	48942	207382	66302	252362	218722	60782	60782
refbc_292517_FJ156283	245	31486	170462	30846	198538	164898	36170	36170
refbc_292534_FJ197265	264	31486	170462	35490	218722	181718	41174	41174
refbc_292583_AY714746	503	56342	207382	66302	261362	226522	67222	67222
refbc_294003_AM889687	295	36170	178982	35490	218722	181718	41174	41174
refbc_29652_AB507905	549	56342	218742	66302	272546	235542	77062	77062
refbc_29652_AB507906	549	56342	218742	66302	272546	235542	77062	77062
refbc_29652_AB507907	549	56342	218742	66302	272546	235542	77062	77062
refbc_29652_AB507908	549	56342	218742	66302	272546	235542	77062	77062
refbc_29652_AB507909	549	56342	218742	66302	272546	235542	77062	77062
refbc_29652_AB507910	549	56342	218742	66302	272546	235542	77062	77062
refbc_29652_AB507911	549	56342	218742	66302	272546	235542	77062	77062
refbc_29652_AB507912	549	56342	218742	66302	272546	235542	77062	77062
refbc_29652_AB507913	549	56342	218742	66302	272546	235542	77062	77062
refbc_29652_AB507914	549	56342	218742	66302	272546	235542	77062	77062
refbc_29652_AB507915	549	56342	218742	66302	272546	235542	77062	77062
refbc_29652_AB507916	549	56342	218742	66302	272546	235542	77062	77062
refbc_29652_AB507917	549	56342	218742	66302	272546	235542	77062	77062
refbc_29652_AB507918	549	56342	218742	66302	272546	235542	77062	77062
refbc_29652_AB507919	549	56342	218742	66302	272546	235542	77062	77062
refbc_29652_AB507920	549	56342	218742	66302	272546	235542	77062	77062
refbc_29652_AB507921	549	56342	218742	66302	272546	235542	77062	77062
refbc_29652_AB507922	549	56342	218742	66302	272546	235542	77062	77062
refbc_29652_AB507923	549	56342	218742	66302	272546	235542	77062	77062
refbc_29652_AB507924	549	56342	218742	66302	272546	235542	77062	77062
refbc_29652_AB507925	549	56342	218742	66302	272546	235542	77062	77062
refbc_29652_AB507926	549	56342	218742	66302	272546	235542	77062	77062
refbc_29652_AB507927	549	56342	218742	66302	272546	235542	77062	77062
refbc_29652_AB507928	549	56342	218742	66302	272546	235542	77062	77062
refbc_29652_AB534776	549	56342	218742	66302	272546	235542	77062	77062
refbc_29652_AB534777	549	56342	218742	66302	272546	235542	77062	77062
refbc_29652_AB534778	549	56342	218742	66302	272546	235542	77062	77062
refbc_29652_AB534779	549	56342	218742	66302	272546	235542	77062	77062
refbc_29652_AB534780	549	56342	218742	66302	272546	235542	77062	77062
refbc_29652_AB534781	549	56342	218742	66302	272546	235542	77062	77062
refbc_29655_AY551310	421	48942	198862	66302	252362	218722	60782	60782
refbc_29655_AY551311	421	48942	198862	66302	252362	218722	60782	60782
refbc_29655_AY551312	421	48942	198862	66302	252362	218722	60782	60782
refbc_29655_AY551313	421	48942	198862	66302	252362	218722	60782	60782
refbc_29655_AY551314	421	48942	198862	66302	252362	218722	60782	60782
refbc_29655_AY551315	421	48942	198862	66302	252362	218722	60782	60782
refbc_29655_AY551316	370	41174	187502	51262	235542	198538	54662	54662
refbc_29655_AY551317	421	48942	198862	66302	252362	218722	60782	60782
refbc_29655_AY551318	421	48942	198862	66302	252362	218722	60782	60782
refbc_29655_AY551319	421	48942	198862	66302	252362	218722	60782	60782
refbc_29655_AY551320	421	48942	198862	66302	252362	218722	60782	60782
refbc_29687_EU489217	554	65382	218742	80062	282266	243942	77062	77062
refbc_300649_AJ849587	333	36170	178982	51262	235542	198538	48942	48942
refbc_306897_AY613174	206	27122	159102	24758	198538	164898	31486	31486
refbc_306897_AY613175	206	27122	159102	24758	198538	164898	31486	31486
refbc_307252_EU687718	543	56342	218742	66302	272546	235542	77062	77062
refbc_312744_FJ548095	428	48942	198862	66302	252362	218722	60782	60782
refbc_316951_AY929858	167	21434	150582	20914	181718	144714	27122	27122
refbc_316951_AY929859	167	21434	150582	20914	181718	144714	27122	27122
refbc_316957_AY929866	167	21434	150582	20914	181718	144714	27122	27122
refbc_316957_AY929867	167	21434	150582	20914	181718	144714	27122	27122
refbc_316958_AY929868	167	21434	150582	20914	181718	144714	27122	27122
refbc_316958_AY929869	167	21434	150582	20914	181718	144714	27122	27122
refbc_319665_AJ388193	386	41174	187502	51262	235542	198538	54662	54662
refbc_319665_AJ388263	277	31486	170462	35490	218722	181718	41174	41174
refbc_32233_AY555443	308	36170	178982	51262	218722	181718	41174	41174
refbc_32234_AF487206	308	36170	178982	51262	218722	181718	41174	41174
refbc_32234_AF487207	308	36170	178982	51262	218722	181718	41174	41174
refbc_32243_DQ100235	184	21434	150582	24758	198538	164898	31486	31486
refbc_32243_DQ100236	184	21434	150582	24758	198538	164898	31486	31486
refbc_32243_DQ100237	184	21434	150582	24758	198538	164898	31486	31486
refbc_32243_DQ100238	184	21434	150582	24758	198538	164898	31486	31486
refbc_32243_DQ100239	184	21434	150582	24758	198538	164898	31486	31486
refbc_32243_DQ100240	184	21434	150582	24758	198538	164898	31486	31486
refbc_32243_DQ100241	184	21434	150582	24758	198538	164898	31486	31486
refbc_32243_DQ100242	184	21434	150582	24758	198538	164898	31486	31486
refbc_32243_DQ100243	184	21434	150582	24758	198538	164898	31486	31486
refbc_32243_DQ100244	184	21434	150582	24758	198538	164898	31486	31486
refbc_32243_DQ100245	184	21434	150582	24758	198538	164898	31486	31486
refbc_32243_DQ100246	184	21434	150582	24758	198538	164898	31486	31486
refbc_32243_DQ100247	184	21434	150582	24758	198538	164898	31486	31486
refbc_32243_DQ100248	184	21434	150582	24758	198538	164898	31486	31486
refbc_32243_DQ100249	184	21434	150582	24758	198538	164898	31486	31486
refbc_32243_DQ100250	184	21434	150582	24758	198538	164898	31486	31486
refbc_323095_AB428646	486	56342	207382	66302	252362	218722	67222	67222
refbc_323095_AB428647	464	48942	207382	66302	252362	218722	60782	60782
refbc_323095_AB428648	444	48942	198862	66302	252362	218722	60782	60782
refbc_323095_AB428649	467	48942	207382	66302	252362	218722	60782	60782
refbc_323095_AB428650	480	56342	207382	66302	252362	218722	60782	60782
refbc_324803_FJ670001	554	65382	218742	80062	282266	243942	77062	77062
refbc_326154_DQ860380	160	21434	139222	20914	181718	144714	27122	27122
refbc_326160_DQ860384	160	21434	139222	20914	181718	144714	27122	27122
refbc_326160_DQ860385	160	21434	139222	20914	181718	144714	27122	27122
refbc_326161_DQ860407	160	21434	139222	20914	181718	144714	27122	27122
refbc_326161_DQ860408	160	21434	139222	20914	181718	144714	27122	27122
refbc_326348_AY944609	159	21434	139222	20914	181718	144714	27122	27122
refbc_326348_GU045799	159	21434	139222	20914	181718	144714	27122	27122
refbc_326348_GU045800	159	21434	139222	20914	181718	144714	27122	27122
refbc_326349_AY944610	159	21434	139222	20914	181718	144714	27122	27122
refbc_326349_AY944611	159	21434	139222	20914	181718	144714	27122	27122
refbc_326349_AY944612	159	21434	139222	20914	181718	144714	27122	27122
refbc_326349_AY944613	159	21434	139222	20914	181718	144714	27122	27122
refbc_326349_AY944615	159	21434	139222	20914	181718	144714	27122	27122
refbc_326349_AY944616	159	21434	139222	20914	181718	144714	27122	27122
refbc_326349_AY944619	159	21434	139222	20914	181718	144714	27122	27122
refbc_326349_AY944620	159	21434	139222	20914	181718	144714	27122	27122
refbc_326350_AY944617	159	21434	139222	20914	181718	144714	27122	27122
refbc_326350_AY944618	159	21434	139222	20914	181718	144714	27122	27122
refbc_326350_AY944621	159	21434	139222	20914	181718	144714	27122	27122
refbc_326350_AY944622	159	21434	139222	20914	181718	144714	27122	27122
refbc_326350_AY944623	159	21434	139222	20914	181718	144714	27122	27122
refbc_326350_AY944624	159	21434	139222	20914	181718	144714	27122	27122
refbc_326350_AY944625	159	21434	139222	20914	181718	144714	27122	27122
refbc_326351_AY944626	159	21434	139222	20914	181718	144714	27122	27122
refbc_326351_GU045801	159	21434	139222	20914	181718	144714	27122	27122
refbc_326351_GU045802	159	21434	139222	20914	181718	144714	27122	27122
refbc_326352_AY944627	159	21434	139222	20914	181718	144714	27122	27122
refbc_326352_GU045803	159	21434	139222	20914	181718	144714	27122	27122
refbc_326352_GU045804	159	21434	139222	20914	181718	144714	27122	27122
refbc_326831_AY949721	454	48942	207382	66302	252362	218722	60782	60782
refbc_326831_AY949736	454	48942	207382	66302	252362	218722	60782	60782
refbc_326837_AY949733	454	48942	207382	66302	252362	218722	60782	60782
refbc_326839_AY949740	448	48942	198862	66302	252362	218722	60782	60782
refbc_326839_AY949742	448	48942	198862	66302	252362	218722	60782	60782
refbc_326842_AY949743	454	48942	207382	66302	252362	218722	60782	60782
refbc_326842_AY949747	454	48942	207382	66302	252362	218722	60782	60782
refbc_327328_AB289512	575	65382	218742	80062	291986	252342	77062	77062
refbc_327329_AB289516	575	65382	218742	80062	291986	252342	77062	77062
refbc_327329_AB289517	575	65382	218742	80062	291986	252342	77062	77062
refbc_327329_AB289518	575	65382	218742	80062	291986	252342	77062	77062
refbc_327329_AB289519	575	65382	218742	80062	291986	252342	77062	77062
refbc_329315_AY994188	418	48942	198862	51262	235542	198538	54662	54662
refbc_329315_AY994189	418	48942	198862	51262	235542	198538	54662	54662
refbc_329315_AY994190	418	48942	198862	51262	235542	198538	54662	54662
refbc_329315_AY994191	418	48942	198862	51262	235542	198538	54662	54662
refbc_3311_EF468632	441	48942	198862	66302	252362	218722	60782	60782
refbc_3311_EF468633	441	48942	198862	66302	252362	218722	60782	60782
refbc_3311_EF468634	441	48942	198862	66302	252362	218722	60782	60782
refbc_3311_EF468635	441	48942	198862	66302	252362	218722	60782	60782
refbc_3311_EF468636	441	48942	198862	66302	252362	218722	60782	60782
refbc_3311_EF468637	441	48942	198862	66302	252362	218722	60782	60782
refbc_3311_EF468638	441	48942	198862	66302	252362	218722	60782	60782
refbc_3311_EF468639	441	48942	198862	66302	252362	218722	60782	60782
refbc_3311_EF468640	441	48942	198862	66302	252362	218722	60782	60782
refbc_3340_DQ315400	562	65382	218742	80062	282266	243942	77062	77062
refbc_3340_DQ315401	562	65382	218742	80062	282266	243942	77062	77062
refbc_334805_DQ018273	547	56342	218742	66302	272546	235542	77062	77062
refbc_334810_AY743558	550	56342	218742	66302	272546	235542	77062	77062
refbc_334810_DQ018275	550	56342	218742	66302	272546	235542	77062	77062
refbc_334810_DQ018278	550	56342	218742	66302	272546	235542	77062	77062
refbc_335166_GQ927025	533	56342	218742	66302	270362	234322	77062	77062
refbc_335167_GQ927036	559	65382	218742	80062	282266	243942	77062	77062
refbc_3359_EF395597	443	48942	198862	66302	252362	218722	60782	60782
refbc_3359_EF395598	443	48942	198862	66302	252362	218722	60782	60782
refbc_3406_EF590407	511	56342	218742	66302	261362	226522	67222	67222
refbc_3412_EF590408	498	56342	207382	66302	261362	226522	67222	67222
refbc_3419_FJ786737	357	41174	187502	51262	235542	198538	48942	48942
refbc_3420_FJ786694	357	41174	187502	51262	235542	198538	48942	48942
refbc_3420_FJ786695	357	41174	187502	51262	235542	198538	48942	48942
refbc_3420_FJ786696	357	41174	187502	51262	235542	198538	48942	48942
refbc_3420_FJ786697	357	41174	187502	51262	235542	198538	48942	48942
refbc_3420_FJ786698	357	41174	187502	51262	235542	198538	48942	48942
refbc_3420_FJ786699	357	41174	187502	51262	235542	198538	48942	48942
refbc_3420_FJ786700	357	41174	187502	51262	235542	198538	48942	48942
refbc_3420_FJ786701	357	41174	187502	51262	235542	198538	48942	48942
refbc_3420_FJ786702	357	41174	187502	51262	235542	198538	48942	48942
refbc_3420_FJ786703	357	41174	187502	51262	235542	198538	48942	48942
refbc_3420_FJ786704	357	41174	187502	51262	235542	198538	48942	48942
refbc_3420_FJ786705	357	41174	187502	51262	235542	198538	48942	48942
refbc_3420_FJ786706	357	41174	187502	51262	235542	198538	48942	48942
refbc_3420_FJ786707	357	41174	187502	51262	235542	198538	48942	48942
refbc_3420_FJ786708	357	41174	187502	51262	235542	198538	48942	48942
refbc_3420_FJ786709	357	41174	187502	51262	235542	198538	48942	48942
refbc_3420_FJ786710	357	41174	187502	51262	235542	198538	48942	48942
refbc_3420_FJ786711	357	41174	187502	51262	235542	198538	48942	48942
refbc_3420_FJ786712	357	41174	187502	51262	235542	198538	48942	48942
refbc_3420_FJ786713	357	41174	187502	51262	235542	198538	48942	48942
refbc_3420_FJ786714	357	41174	187502	51262	235542	198538	48942	48942
refbc_3420_FJ786715	357	41174	187502	51262	235542	198538	48942	48942
refbc_3420_FJ786716	357	41174	187502	51262	235542	198538	48942	48942
refbc_3420_FJ786717	357	41174	187502	51262	235542	198538	48942	48942
refbc_3420_FJ786718	357	41174	187502	51262	235542	198538	48942	48942
refbc_3420_FJ786719	357	41174	187502	51262	235542	198538	48942	48942
refbc_3420_FJ786720	357	41174	187502	51262	235542	198538	48942	48942
refbc_3420_FJ786721	357	41174	187502	51262	235542	198538	48942	48942
refbc_3420_FJ786722	357	41174	187502	51262	235542	198538	48942	48942
refbc_3420_FJ786723	357	41174	187502	51262	235542	198538	48942	48942
refbc_3420_FJ786724	357	41174	187502	51262	235542	198538	48942	48942
refbc_3420_FJ786725	357	41174	187502	51262	235542	198538	48942	48942
refbc_34206_FJ197221	263	31486	170462	35490	218722	181718	41174	41174
refbc_34207_FJ197224	263	31486	170462	35490	218722	181718	41174	41174
refbc_34208_FJ197228	263	31486	170462	35490	218722	181718	41174	41174
refbc_34209_FJ197230	263	31486	170462	35490	218722	181718	41174	41174
refbc_34211_FJ197237	262	31486	170462	35490	218722	181718	36170	36170
refbc_34212_FJ197223	244	31486	170462	30846	198538	164898	36170	36170
refbc_34213_FJ197229	265	31486	170462	35490	218722	181718	41174	41174
refbc_34214_FJ197247	265	31486	170462	35490	218722	181718	41174	41174
refbc_34215_FJ197248	262	31486	170462	35490	218722	181718	36170	36170
refbc_3422_FJ786732	357	41174	187502	51262	235542	198538	48942	48942
refbc_34253_EU919617	450	48942	207382	66302	252362	218722	60782	60782
refbc_344406_FJ160826	194	27122	150582	24758	198538	164898	31486	31486
refbc_3505_AM503811	575	65382	218742	80062	291986	252342	77062	77062
refbc_3510_EF590411	511	56342	218742	66302	261362	226522	67222	67222
refbc_3512_EU749366	570	65382	218742	80062	282266	243942	77062	77062
refbc_3513_AY042464	311	36170	178982	51262	218722	181718	41174	41174
refbc_3513_AY042469	311	36170	178982	51262	218722	181718	41174	41174
refbc_351339_DQ846564	153	21434	139222	20914	181718	144714	21434	21434
refbc_351339_DQ846565	153	21434	139222	20914	181718	144714	21434	21434
refbc_351339_DQ846576	153	21434	139222	20914	181718	144714	21434	21434
refbc_351339_DQ846577	153	21434	139222	20914	181718	144714	21434	21434
refbc_351339_DQ846578	153	21434	139222	20914	181718	144714	21434	21434
refbc_351339_DQ846594	153	21434	139222	20914	181718	144714	21434	21434
refbc_351339_DQ846595	153	21434	139222	20914	181718	144714	21434	21434
refbc_3565_EF590393	492	56342	207382	66302	252362	218722	67222	67222
refbc_3572_GU441228	488	56342	207382	66302	252362	218722	67222	67222
refbc_35941_FJ160841	194	27122	150582	24758	198538	164898	31486	31486
refbc_359411_FJ197261	281	31486	170462	35490	218722	181718	41174	41174
refbc_3617_EF653711	404	41174	198862	51262	235542	198538	54662	54662
refbc_36600_AY555444	308	36170	178982	51262	218722	181718	41174	41174
refbc_36610_AF309240	427	48942	198862	66302	252362	218722	60782	60782
refbc_3668_EF590406	511	56342	218742	66302	261362	226522	67222	67222
refbc_3702_AJ971666	307	36170	178982	51262	218722	181718	41174	41174
refbc_3702_AJ971667	317	36170	178982	51262	218722	181718	48942	48942
refbc_3726_EF590418	507	56342	207382	66302	261362	226522	67222	67222
refbc_373105_DQ397982	359	41174	187502	51262	235542	198538	48942	48942
refbc_373105_DQ397983	360	41174	187502	51262	235542	198538	48942	48942
refbc_373107_DQ397986	245	31486	170462	30846	198538	164898	36170	36170
refbc_373107_DQ397987	359	41174	187502	51262	235542	198538	48942	48942
refbc_37334_AB071303	445	48942	198862	66302	252362	218722	60782	60782
refbc_373420_EF590400	439	48942	198862	66302	252362	218722	60782	60782
refbc_373420_GQ248111	506	56342	207382	66302	261362	226522	67222	67222
refbc_3752_AF309230	401	41174	198862	51262	235542	198538	54662	54662
refbc_3752_AF309231	401	41174	198862	51262	235542	198538	54662	54662
refbc_376532_DQ420012	522	56342	218742	66302	270362	234322	67222	67222
refbc_37657_AY707959	355	41174	187502	51262	235542	198538	48942	48942
refbc_37657_DQ841762	571	65382	218742	80062	282266	243942	77062	77062
refbc_37682_DQ420008	448	48942	198862	66302	252362	218722	60782	60782
refbc_37682_DQ420045	522	56342	218742	66302	270362	234322	67222	67222
refbc_37682_EU013204	432	48942	198862	66302	252362	218722	60782	60782
refbc_37682_EU013205	432	48942	198862	66302	252362	218722	60782	60782
refbc_37690_AB071318	445	48942	198862	66302	252362	218722	60782	60782
refbc_381595_FJ197246	262	31486	170462	35490	218722	181718	36170	36170
refbc_38211_DQ525860	412	48942	198862	51262	235542	198538	54662	54662
refbc_3866_EU812016	245	31486	170462	30846	198538	164898	36170	36170
refbc_38700_EU489184	554	65382	218742	80062	282266	243942	77062	77062
refbc_38855_Z70196	430	48942	198862	66302	252362	218722	60782	60782
refbc_38865_AY042472	357	41174	187502	51262	235542	198538	48942	48942
refbc_38865_FN674496	303	36170	178982	35490	218722	181718	41174	41174
refbc_38865_FN674497	303	36170	178982	35490	218722	181718	41174	41174
refbc_38865_FN674498	303	36170	178982	35490	218722	181718	41174	41174
refbc_388733_DQ536105	350	41174	187502	51262	235542	198538	48942	48942
refbc_388733_DQ536106	350	41174	187502	51262	235542	198538	48942	48942
refbc_388733_DQ536107	350	41174	187502	51262	235542	198538	48942	48942
refbc_38942_AY042468	311	36170	178982	51262	218722	181718	41174	41174
refbc_38942_AY042487	357	41174	187502	51262	235542	198538	48942	48942
refbc_38942_AY042488	357	41174	187502	51262	235542	198538	48942	48942
refbc_38942_FN674494	303	36170	178982	35490	218722	181718	41174	41174
refbc_38942_FN674495	303	36170	178982	35490	218722	181718	41174	41174
refbc_38942_FN674499	303	36170	178982	35490	218722	181718	41174	41174
refbc_3906_EU307318	467	48942	207382	66302	252362	218722	60782	60782
refbc_3906_EU307319	467	48942	207382	66302	252362	218722	60782	60782
refbc_3906_EU307320	467	48942	207382	66302	252362	218722	60782	60782
refbc_392335_DQ657833	347	36170	187502	51262	235542	198538	48942	48942
refbc_392336_DQ657835	347	36170	187502	51262	235542	198538	48942	48942
refbc_392622_DQ860399	160	21434	139222	20914	181718	144714	27122	27122
refbc_392622_DQ860400	159	21434	139222	20914	181718	144714	27122	27122
refbc_392622_DQ860401	159	21434	139222	20914	181718	144714	27122	27122
refbc_39352_FJ395365	484	56342	207382	66302	252362	218722	67222	67222
refbc_39379_AJ010528	386	41174	187502	51262	235542	198538	54662	54662
refbc_39379_AJ011457	281	31486	170462	35490	218722	181718	41174	41174
refbc_39468_FN674500	303	36170	178982	35490	218722	181718	41174	41174
refbc_39468_FN674501	303	36170	178982	35490	218722	181718	41174	41174
refbc_39468_FN674502	303	36170	178982	35490	218722	181718	41174	41174
refbc_39471_AY042470	357	41174	187502	51262	235542	198538	48942	48942
refbc_39471_AY042471	357	41174	187502	51262	235542	198538	48942	48942
refbc_39471_AY042473	357	41174	187502	51262	235542	198538	48942	48942
refbc_39471_AY042474	357	41174	187502	51262	235542	198538	48942	48942
refbc_39471_FN674488	303	36170	178982	35490	218722	181718	41174	41174
refbc_39471_FN674492	303	36170	178982	35490	218722	181718	41174	41174
refbc_39471_FN674493	303	36170	178982	35490	218722	181718	41174	41174
refbc_39584_EU749467	535	56342	218742	66302	272546	235542	77062	77062
refbc_39584_EU749469	544	56342	218742	66302	272546	235542	77062	77062
refbc_397632_DQ790613	167	21434	150582	20914	181718	144714	27122	27122
refbc_397641_DQ790629	167	21434	150582	20914	181718	144714	27122	27122
refbc_397643_DQ790633	353	41174	187502	51262	235542	198538	48942	48942
refbc_3985_DQ536112	350	41174	187502	51262	235542	198538	48942	48942
refbc_3985_DQ536113	350	41174	187502	51262	235542	198538	48942	48942
refbc_398570_DQ846631	153	21434	139222	20914	181718	144714	21434	21434
refbc_398571_DQ846534	153	21434	139222	20914	181718	144714	21434	21434
refbc_398571_DQ846535	153	21434	139222	20914	181718	144714	21434	21434
refbc_398571_DQ846536	153	21434	139222	20914	181718	144714	21434	21434
refbc_398571_DQ846600	153	21434	139222	20914	181718	144714	21434	21434
refbc_398571_DQ846601	153	21434	139222	20914	181718	144714	21434	21434
refbc_398571_DQ846602	153	21434	139222	20914	181718	144714	21434	21434
refbc_398571_DQ846603	153	21434	139222	20914	181718	144714	21434	21434
refbc_398571_DQ846604	153	21434	139222	20914	181718	144714	21434	21434
refbc_398571_DQ846605	153	21434	139222	20914	181718	144714	21434	21434
refbc_398572_DQ846516	153	21434	139222	20914	181718	144714	21434	21434
refbc_398572_DQ846517	153	21434	139222	20914	181718	144714	21434	21434
refbc_398572_DQ846518	152	21434	139222	20914	181718	144714	21434	21434
refbc_398573_DQ846531	153	21434	139222	20914	181718	144714	21434	21434
refbc_398573_DQ846532	153	21434	139222	20914	181718	144714	21434	21434
refbc_398573_DQ846533	153	21434	139222	20914	181718	144714	21434	21434
refbc_398573_DQ846540	153	21434	139222	20914	181718	144714	21434	21434
refbc_398573_DQ846541	153	21434	139222	20914	181718	144714	21434	21434
refbc_398573_DQ846542	153	21434	139222	20914	181718	144714	21434	21434
refbc_398573_DQ846553	153	21434	139222	20914	181718	144714	21434	21434
refbc_398573_DQ846554	153	21434	139222	20914	181718	144714	21434	21434
refbc_398573_DQ846558	153	21434	139222	20914	181718	144714	21434	21434
refbc_398573_DQ846559	153	21434	139222	20914	181718	144714	21434	21434
refbc_398573_DQ846560	153	21434	139222	20914	181718	144714	21434	21434
refbc_398573_DQ846570	153	21434	139222	20914	181718	144714	21434	21434
refbc_398573_DQ846571	153	21434	139222	20914	181718	144714	21434	21434
refbc_398573_DQ846572	153	21434	139222	20914	181718	144714	21434	21434
refbc_398573_DQ846573	153	21434	139222	20914	181718	144714	21434	21434
refbc_398573_DQ846574	153	21434	139222	20914	181718	144714	21434	21434
refbc_398573_DQ846575	153	21434	139222	20914	181718	144714	21434	21434
refbc_398573_DQ846585	153	21434	139222	20914	181718	144714	21434	21434
refbc_398573_DQ846586	153	21434	139222	20914	181718	144714	21434	21434
refbc_398573_DQ846587	153	21434	139222	20914	181718	144714	21434	21434
refbc_398573_DQ846588	153	21434	139222	20914	181718	144714	21434	21434
refbc_398573_DQ846589	153	21434	139222	20914	181718	144714	21434	21434
refbc_398573_DQ846590	153	21434	139222	20914	181718	144714	21434	21434
refbc_398573_DQ846591	153	21434	139222	20914	181718	144714	21434	21434
refbc_398573_DQ846592	153	21434	139222	20914	181718	144714	21434	21434
refbc_398573_DQ846593	153	21434	139222	20914	181718	144714	21434	21434
refbc_398573_DQ846597	153	21434	139222	20914	181718	144714	21434	21434
refbc_398573_DQ846598	153	21434	139222	20914	181718	144714	21434	21434
refbc_398573_DQ846599	153	21434	139222	20914	181718	144714	21434	21434
refbc_398573_DQ846606	153	21434	139222	20914	181718	144714	21434	21434
refbc_398573_DQ846607	153	21434	139222	20914	181718	144714	21434	21434
refbc_398573_DQ846608	153	21434	139222	20914	181718	144714	21434	21434
refbc_398573_DQ846609	153	21434	139222	20914	181718	144714	21434	21434
refbc_398573_DQ846610	153	21434	139222	20914	181718	144714	21434	21434
refbc_398573_DQ846611	153	21434	139222	20914	181718	144714	21434	21434
refbc_398573_DQ846612	153	21434	139222	20914	181718	144714	21434	21434
refbc_398573_DQ846613	153	21434	139222	20914	181718	144714	21434	21434
refbc_398573_DQ846614	153	21434	139222	20914	181718	144714	21434	21434
refbc_398573_DQ846621	153	21434	139222	20914	181718	144714	21434	21434
refbc_398573_DQ846622	153	21434	139222	20914	181718	144714	21434	21434
refbc_398573_DQ846623	153	21434	139222	20914	181718	144714	21434	21434
refbc_398573_DQ846624	153	21434	139222	20914	181718	144714	21434	21434
refbc_398573_DQ846625	153	21434	139222	20914	181718	144714	21434	21434
refbc_398573_DQ846626	153	21434	139222	20914	181718	144714	21434	21434
refbc_398573_DQ846627	153	21434	139222	20914	181718	144714	21434	21434
refbc_398573_DQ846628	153	21434	139222	20914	181718	144714	21434	21434
refbc_398573_DQ846629	153	21434	139222	20914	181718	144714	21434	21434
refbc_398574_DQ846561	153	21434	139222	20914	181718	144714	21434	21434
refbc_398574_DQ846562	153	21434	139222	20914	181718	144714	21434	21434
refbc_398574_DQ846563	153	21434	139222	20914	181718	144714	21434	21434
refbc_398575_DQ846567	153	21434	139222	20914	181718	144714	21434	21434
refbc_398575_DQ846568	153	21434	139222	20914	181718	144714	21434	21434
refbc_398575_DQ846569	153	21434	139222	20914	181718	144714	21434	21434
refbc_3986_AY918208	441	48942	198862	66302	252362	218722	60782	60782
refbc_3986_AY918209	441	48942	198862	66302	252362	218722	60782	60782
refbc_3986_AY918210	441	48942	198862	66302	252362	218722	60782	60782
refbc_3986_AY918211	389	41174	187502	51262	235542	198538	54662	54662
refbc_3986_AY918212	441	48942	198862	66302	252362	218722	60782	60782
refbc_3986_AY918213	441	48942	198862	66302	252362	218722	60782	60782
refbc_3986_AY918214	352	41174	187502	51262	235542	198538	48942	48942
refbc_3986_AY918215	353	41174	187502	51262	235542	198538	48942	48942
refbc_3986_AY918216	354	41174	187502	51262	235542	198538	48942	48942
refbc_3986_DQ536103	350	41174	187502	51262	235542	198538	48942	48942
refbc_3986_DQ536104	350	41174	187502	51262	235542	198538	48942	48942
refbc_3988_DQ536102	349	41174	187502	51262	235542	198538	48942	48942
refbc_39919_DQ841761	571	65382	218742	80062	282266	243942	77062	77062
refbc_399635_EU489215	554	65382	218742	80062	282266	243942	77062	77062
refbc_399635_EU489216	554	65382	218742	80062	282266	243942	77062	77062
refbc_4023_EU749280	590	65382	227262	80062	291986	252342	77062	77062
refbc_4024_EU749290	562	65382	218742	80062	282266	243942	77062	77062
refbc_4024_EU749292	579	65382	227262	80062	291986	252342	77062	77062
refbc_4025_EU749282	590	65382	227262	80062	291986	252342	77062	77062
refbc_4025_EU749283	590	65382	227262	80062	291986	252342	77062	77062
refbc_402568_DQ861739	298	36170	178982	35490	218722	181718	41174	41174
refbc_403044_DQ860382	155	21434	139222	20914	181718	144714	27122	27122
refbc_403044_DQ860383	155	21434	139222	20914	181718	144714	27122	27122
refbc_403045_DQ860387	160	21434	139222	20914	181718	144714	27122	27122
refbc_403046_DQ860397	160	21434	139222	20914	181718	144714	27122	27122
refbc_403046_DQ860398	160	21434	139222	20914	181718	144714	27122	27122
refbc_403051_DQ860390	160	21434	139222	20914	181718	144714	27122	27122
refbc_403051_DQ860391	160	21434	139222	20914	181718	144714	27122	27122
refbc_403051_DQ860392	160	21434	139222	20914	181718	144714	27122	27122
refbc_403051_DQ860393	160	21434	139222	20914	181718	144714	27122	27122
refbc_403051_DQ860394	160	21434	139222	20914	181718	144714	27122	27122
refbc_403051_DQ860396	160	21434	139222	20914	181718	144714	27122	27122
refbc_403052_DQ860403	160	21434	139222	20914	181718	144714	27122	27122
refbc_403052_DQ860404	160	21434	139222	20914	181718	144714	27122	27122
refbc_403052_DQ860405	160	21434	139222	20914	181718	144714	27122	27122
refbc_40686_AJ849586	333	36170	178982	51262	235542	198538	48942	48942
refbc_40949_EF590395	501	56342	207382	66302	261362	226522	67222	67222
refbc_411565_GU934755	487	56342	207382	66302	252362	218722	67222	67222
refbc_411565_GU934756	487	56342	207382	66302	252362	218722	67222	67222
refbc_411565_GU934757	487	56342	207382	66302	252362	218722	67222	67222
refbc_411565_GU934758	487	56342	207382	66302	252362	218722	67222	67222
refbc_411565_GU934759	487	56342	207382	66302	252362	218722	67222	67222
refbc_411565_GU934760	487	56342	207382	66302	252362	218722	67222	67222
refbc_411565_GU934761	487	56342	207382	66302	252362	218722	67222	67222
refbc_411565_GU934762	488	56342	207382	66302	252362	218722	67222	67222
refbc_411565_GU934763	487	56342	207382	66302	252362	218722	67222	67222
refbc_41496_AY554070	178	21434	150582	24758	181718	144714	27122	27122
refbc_41507_DQ846630	153	21434	139222	20914	181718	144714	21434	21434
refbc_4153_AY492134	205	27122	159102	24758	198538	164898	31486	31486
refbc_419406_AB289510	575	65382	218742	80062	291986	252342	77062	77062
refbc_419406_AB289511	575	65382	218742	80062	291986	252342	77062	77062
refbc_419407_AB289513	575	65382	218742	80062	291986	252342	77062	77062
refbc_419407_AB289514	575	65382	218742	80062	291986	252342	77062	77062
refbc_419407_AB289515	575	65382	218742	80062	291986	252342	77062	77062
refbc_419410_AB289520	575	65382	218742	80062	291986	252342	77062	77062
refbc_4202_EF490241	443	48942	198862	66302	252362	218722	60782	60782
refbc_4203_AY265204	443	48942	198862	66302	252362	218722	60782	60782
refbc_4203_EF490242	443	48942	198862	66302	252362	218722	60782	60782
refbc_42043_DQ841753	570	65382	218742	80062	282266	243942	77062	77062
refbc_42043_DQ841754	570	65382	218742	80062	282266	243942	77062	77062
refbc_42043_DQ841755	570	65382	218742	80062	282266	243942	77062	77062
refbc_42043_DQ841756	570	65382	218742	80062	282266	243942	77062	77062
refbc_42043_DQ841757	570	65382	218742	80062	282266	243942	77062	77062
refbc_42043_DQ841758	570	65382	218742	80062	282266	243942	77062	77062
refbc_42043_DQ841759	570	65382	218742	80062	282266	243942	77062	77062
refbc_42043_DQ841760	570	65382	218742	80062	282266	243942	77062	77062
refbc_4205_AY265160	443	48942	198862	66302	252362	218722	60782	60782
refbc_4208_EF490235	443	48942	198862	66302	252362	218722	60782	60782
refbc_42345_GQ422122	526	56342	218742	66302	270362	234322	67222	67222
refbc_42569_FJ197243	263	31486	170462	35490	218722	181718	41174	41174
refbc_42570_FJ197245	189	27122	150582	24758	198538	164898	31486	31486
refbc_429228_EF653721	381	41174	187502	51262	235542	198538	54662	54662
refbc_430754_EF653729	410	41174	198862	51262	235542	198538	54662	54662
refbc_430754_EU196940	399	41174	198862	51262	235542	198538	54662	54662
refbc_430754_EU196941	416	48942	198862	51262	235542	198538	54662	54662
refbc_43171_AM889720	597	65382	227262	80062	301706	260742	77062	77062
refbc_43171_AY492149	206	27122	159102	24758	198538	164898	31486	31486
refbc_434497_EF178958	599	65382	227262	80062	301706	260742	77062	77062
refbc_434498_EF178961	599	65382	227262	80062	301706	260742	77062	77062
refbc_434499_EF178959	599	65382	227262	80062	301706	260742	77062	77062
refbc_434500_EF178960	592	65382	227262	80062	291986	252342	77062	77062
refbc_434501_EF178957	599	65382	227262	80062	301706	260742	77062	77062
refbc_434519_EF178948	539	56342	218742	66302	272546	235542	77062	77062
refbc_434521_EF178932	594	65382	227262	80062	291986	252342	77062	77062
refbc_434526_EF178931	594	65382	227262	80062	291986	252342	77062	77062
refbc_434529_EF178922	540	56342	218742	66302	272546	235542	77062	77062
refbc_434531_EF178926	598	65382	227262	80062	301706	260742	77062	77062
refbc_434540_EF178965	599	65382	227262	80062	301706	260742	77062	77062
refbc_434541_EF178967	599	65382	227262	80062	301706	260742	77062	77062
refbc_434542_EF178962	599	65382	227262	80062	301706	260742	77062	77062
refbc_434543_EF178966	599	65382	227262	80062	301706	260742	77062	77062
refbc_434543_EF178968	599	65382	227262	80062	301706	260742	77062	77062
refbc_434544_EF178963	599	65382	227262	80062	301706	260742	77062	77062
refbc_434575_EF178972	596	65382	227262	80062	301706	260742	77062	77062
refbc_435386_EF173088	175	21434	150582	24758	181718	144714	27122	27122
refbc_436501_EF490251	443	48942	198862	66302	252362	218722	60782	60782
refbc_4396_U92847	302	36170	178982	35490	218722	181718	41174	41174
refbc_445235_EF395601	455	48942	207382	66302	252362	218722	60782	60782
refbc_445235_EF395602	455	48942	207382	66302	252362	218722	60782	60782
refbc_445235_EF395603	455	48942	207382	66302	252362	218722	60782	60782
refbc_445235_EF395604	455	48942	207382	66302	252362	218722	60782	60782
refbc_445235_EF395605	455	48942	207382	66302	252362	218722	60782	60782
refbc_4460_AB494684	351	41174	187502	51262	235542	198538	48942	48942
refbc_446144_EF590399	439	48942	198862	66302	252362	218722	60782	60782
refbc_446147_EF590402	494	56342	207382	66302	252362	218722	67222	67222
refbc_446150_EF590409	507	56342	207382	66302	261362	226522	67222	67222
refbc_446151_EF590413	489	56342	207382	66302	252362	218722	67222	67222
refbc_446152_EF590414	416	48942	198862	51262	235542	198538	54662	54662
refbc_4463_AB494670	351	41174	187502	51262	235542	198538	48942	48942
refbc_4483_DQ420040	522	56342	218742	66302	270362	234322	67222	67222
refbc_4486_DQ420042	522	56342	218742	66302	270362	234322	67222	67222
refbc_4487_DQ420055	522	56342	218742	66302	270362	234322	67222	67222
refbc_4492_EU013207	432	48942	198862	66302	252362	218722	60782	60782
refbc_449885_GU135457	556	65382	218742	80062	282266	243942	77062	77062
refbc_452453_EF653712	416	48942	198862	51262	235542	198538	54662	54662
refbc_4550_DQ420046	522	56342	218742	66302	270362	234322	67222	67222
refbc_4565_DQ420013	522	56342	218742	66302	270362	234322	67222	67222
refbc_4565_DQ420028	522	56342	218742	66302	270362	234322	67222	67222
refbc_4568_DQ420003	448	48942	198862	66302	252362	218722	60782	60782
refbc_4568_DQ420054	522	56342	218742	66302	270362	234322	67222	67222
refbc_4570_DQ420030	522	56342	218742	66302	270362	234322	67222	67222
refbc_4570_DQ420032	522	56342	218742	66302	270362	234322	67222	67222
refbc_4571_DQ420015	522	56342	218742	66302	270362	234322	67222	67222
refbc_4571_DQ420027	522	56342	218742	66302	270362	234322	67222	67222
refbc_457184_EU196945	410	41174	198862	51262	235542	198538	54662	54662
refbc_4572_DQ420005	448	48942	198862	66302	252362	218722	60782	60782
refbc_4572_DQ420039	522	56342	218742	66302	270362	234322	67222	67222
refbc_4573_DQ420009	448	48942	198862	66302	252362	218722	60782	60782
refbc_4573_DQ420035	522	56342	218742	66302	270362	234322	67222	67222
refbc_458697_AB494656	351	41174	187502	51262	235542	198538	48942	48942
refbc_46033_AY949745	460	48942	207382	66302	252362	218722	60782	60782
refbc_467334_EU196951	410	41174	198862	51262	235542	198538	54662	54662
refbc_467606_EU196930	410	41174	198862	51262	235542	198538	54662	54662
refbc_467606_EU196931	410	41174	198862	51262	235542	198538	54662	54662
refbc_467608_FJ011122	227	27122	159102	30846	198538	164898	36170	36170
refbc_467608_FJ011123	227	27122	159102	30846	198538	164898	36170	36170
refbc_467608_FJ011124	227	27122	159102	30846	198538	164898	36170	36170
refbc_467608_FJ011125	227	27122	159102	30846	198538	164898	36170	36170
refbc_467608_FJ011126	233	27122	159102	30846	198538	164898	36170	36170
refbc_467609_FJ011174	227	27122	159102	30846	198538	164898	36170	36170
refbc_467609_FJ011175	227	27122	159102	30846	198538	164898	36170	36170
refbc_467609_FJ011176	227	27122	159102	30846	198538	164898	36170	36170
refbc_467609_FJ011177	227	27122	159102	30846	198538	164898	36170	36170
refbc_467609_FJ011178	227	27122	159102	30846	198538	164898	36170	36170
refbc_467609_FJ160818	194	27122	150582	24758	198538	164898	31486	31486
refbc_46788_EF653723	410	41174	198862	51262	235542	198538	54662	54662
refbc_46901_EF653727	410	41174	198862	51262	235542	198538	54662	54662
refbc_46901_EF653728	410	41174	198862	51262	235542	198538	54662	54662
refbc_46993_AF007946	591	65382	227262	80062	291986	252342	77062	77062
refbc_475907_EU919619	450	48942	207382	66302	252362	218722	60782	60782
refbc_475917_EU919627	450	48942	207382	66302	252362	218722	60782	60782
refbc_476171_AM889710	471	48942	207382	66302	252362	218722	60782	60782
refbc_47689_AY265192	443	48942	198862	66302	252362	218722	60782	60782
refbc_48101_EF590396	462	48942	207382	66302	252362	218722	60782	60782
refbc_487114_AB494674	351	41174	187502	51262	235542	198538	48942	48942
refbc_487920_EU489171	554	65382	218742	80062	282266	243942	77062	77062
refbc_487920_EU489172	554	65382	218742	80062	282266	243942	77062	77062
refbc_487928_EU489174	554	65382	218742	80062	282266	243942	77062	77062
refbc_487928_EU489175	554	65382	218742	80062	282266	243942	77062	77062
refbc_487937_EU489181	554	65382	218742	80062	282266	243942	77062	77062
refbc_487937_EU489182	554	65382	218742	80062	282266	243942	77062	77062
refbc_487951_EU489192	554	65382	218742	80062	282266	243942	77062	77062
refbc_487951_EU489193	554	65382	218742	80062	282266	243942	77062	77062
refbc_487951_EU489194	554	65382	218742	80062	282266	243942	77062	77062
refbc_487953_EU489198	554	65382	218742	80062	282266	243942	77062	77062
refbc_487953_EU489199	554	65382	218742	80062	282266	243942	77062	77062
refbc_487953_EU489200	554	65382	218742	80062	282266	243942	77062	77062
refbc_487956_EU489211	554	65382	218742	80062	282266	243942	77062	77062
refbc_487956_EU489212	554	65382	218742	80062	282266	243942	77062	77062
refbc_487956_EU489213	554	65382	218742	80062	282266	243942	77062	77062
refbc_487956_EU489214	554	65382	218742	80062	282266	243942	77062	77062
refbc_487995_EU196932	410	41174	198862	51262	235542	198538	54662	54662
refbc_487995_EU196933	368	41174	187502	51262	235542	198538	54662	54662
refbc_487997_EU196935	410	41174	198862	51262	235542	198538	54662	54662
refbc_487997_EU196936	410	41174	198862	51262	235542	198538	54662	54662
refbc_487997_EU196937	410	41174	198862	51262	235542	198538	54662	54662
refbc_488003_EU196947	410	41174	198862	51262	235542	198538	54662	54662
refbc_488003_EU196948	410	41174	198862	51262	235542	198538	54662	54662
refbc_489017_GQ982048	198	27122	150582	24758	198538	164898	31486	31486
refbc_489022_EU153869	431	48942	198862	66302	252362	218722	60782	60782
refbc_491970_AB494673	351	41174	187502	51262	235542	198538	48942	48942
refbc_491978_AB494675	351	41174	187502	51262	235542	198538	48942	48942
refbc_491987_AB494677	351	41174	187502	51262	235542	198538	48942	48942
refbc_493958_EU214224	599	65382	227262	80062	301706	260742	77062	77062
refbc_493997_EU214499	580	65382	227262	80062	291986	252342	77062	77062
refbc_49472_AB127587	207	27122	159102	24758	198538	164898	31486	31486
refbc_49713_AJ580617	162	21434	150582	20914	181718	144714	27122	27122
refbc_49935_AJ388165	386	41174	187502	51262	235542	198538	54662	54662
refbc_49935_AJ388235	281	31486	170462	35490	218722	181718	41174	41174
refbc_49936_AJ010517	386	41174	187502	51262	235542	198538	54662	54662
refbc_49936_AJ011446	281	31486	170462	35490	218722	181718	41174	41174
refbc_49936_AJ295334	386	41174	187502	51262	235542	198538	54662	54662
refbc_49936_AJ295335	277	31486	170462	35490	218722	181718	41174	41174
refbc_49943_AJ010519	386	41174	187502	51262	235542	198538	54662	54662
refbc_49943_AJ011448	281	31486	170462	35490	218722	181718	41174	41174
refbc_49945_AJ388166	386	41174	187502	51262	235542	198538	54662	54662
refbc_49945_AJ388236	276	31486	170462	35490	218722	181718	41174	41174
refbc_49961_AJ406335	382	41174	187502	51262	235542	198538	54662	54662
refbc_49961_AJ406363	277	31486	170462	35490	218722	181718	41174	41174
refbc_500179_EU401413	465	48942	207382	66302	252362	218722	60782	60782
refbc_50277_AJ406346	385	41174	187502	51262	235542	198538	54662	54662
refbc_50277_AJ406374	277	31486	170462	35490	218722	181718	41174	41174
refbc_50753_AJ406324	386	41174	187502	51262	235542	198538	54662	54662
refbc_50753_AJ406353	272	31486	170462	35490	218722	181718	41174	41174
refbc_50806_AJ388177	386	41174	187502	51262	235542	198538	54662	54662
refbc_50806_AJ388247	286	31486	170462	35490	218722	181718	41174	41174
refbc_51604_DQ397980	359	41174	187502	51262	235542	198538	48942	48942
refbc_519333_GQ163356	366	41174	187502	51262	235542	198538	48942	48942
refbc_52147_FJ395380	585	65382	227262	80062	291986	252342	77062	77062
refbc_52163_DQ420006	448	48942	198862	66302	252362	218722	60782	60782
refbc_52163_DQ420038	522	56342	218742	66302	270362	234322	67222	67222
refbc_523877_EU489188	554	65382	218742	80062	282266	243942	77062	77062
refbc_523877_EU489189	554	65382	218742	80062	282266	243942	77062	77062
refbc_523880_EU489195	554	65382	218742	80062	282266	243942	77062	77062
refbc_523880_EU489196	554	65382	218742	80062	282266	243942	77062	77062
refbc_52518_AJ010514	386	41174	187502	51262	235542	198538	54662	54662
refbc_52518_AJ011443	281	31486	170462	35490	218722	181718	41174	41174
refbc_53155_AJ388167	386	41174	187502	51262	235542	198538	54662	54662
refbc_53155_AJ388237	281	31486	170462	35490	218722	181718	41174	41174
refbc_543563_EU919612	450	48942	207382	66302	252362	218722	60782	60782
refbc_543564_EU919614	450	48942	207382	66302	252362	218722	60782	60782
refbc_544988_EU643753	557	65382	218742	80062	282266	243942	77062	77062
refbc_545005_EU643772	575	65382	218742	80062	291986	252342	77062	77062
refbc_545370_EU815630	539	56342	218742	66302	272546	235542	77062	77062
refbc_545370_EU815631	539	56342	218742	66302	272546	235542	77062	77062
refbc_550900_EU914325	349	41174	187502	51262	235542	198538	48942	48942
refbc_550900_EU914326	349	41174	187502	51262	235542	198538	48942	48942
refbc_550901_EU914320	349	41174	187502	51262	235542	198538	48942	48942
refbc_550901_EU914321	349	41174	187502	51262	235542	198538	48942	48942
refbc_550916_EU914371	349	41174	187502	51262	235542	198538	48942	48942
refbc_550916_EU914372	349	41174	187502	51262	235542	198538	48942	48942
refbc_550939_EU914391	349	41174	187502	51262	235542	198538	48942	48942
refbc_550939_EU914392	349	41174	187502	51262	235542	198538	48942	48942
refbc_55184_EU814659	596	65382	227262	80062	301706	260742	77062	77062
refbc_55492_AB507929	549	56342	218742	66302	272546	235542	77062	77062
refbc_55492_AB507930	549	56342	218742	66302	272546	235542	77062	77062
refbc_55492_AB507931	549	56342	218742	66302	272546	235542	77062	77062
refbc_55492_AB507932	549	56342	218742	66302	272546	235542	77062	77062
refbc_55492_AB507933	549	56342	218742	66302	272546	235542	77062	77062
refbc_557740_EU735956	593	65382	227262	80062	291986	252342	77062	77062
refbc_557745_EU735969	592	65382	227262	80062	291986	252342	77062	77062
refbc_558675_FJ011117	227	27122	159102	30846	198538	164898	36170	36170
refbc_558675_FJ011118	227	27122	159102	30846	198538	164898	36170	36170
refbc_558675_FJ011119	227	27122	159102	30846	198538	164898	36170	36170
refbc_558675_FJ011120	227	27122	159102	30846	198538	164898	36170	36170
refbc_558675_FJ011121	227	27122	159102	30846	198538	164898	36170	36170
refbc_558676_FJ011127	227	27122	159102	30846	198538	164898	36170	36170
refbc_558676_FJ011128	227	27122	159102	30846	198538	164898	36170	36170
refbc_558676_FJ011129	227	27122	159102	30846	198538	164898	36170	36170
refbc_558676_FJ011130	227	27122	159102	30846	198538	164898	36170	36170
refbc_558676_FJ011131	227	27122	159102	30846	198538	164898	36170	36170
refbc_558677_FJ011132	227	27122	159102	30846	198538	164898	36170	36170
refbc_558677_FJ011133	227	27122	159102	30846	198538	164898	36170	36170
refbc_558677_FJ011134	227	27122	159102	30846	198538	164898	36170	36170
refbc_558677_FJ011135	227	27122	159102	30846	198538	164898	36170	36170
refbc_558677_FJ011136	227	27122	159102	30846	198538	164898	36170	36170
refbc_558677_FJ011137	227	27122	159102	30846	198538	164898	36170	36170
refbc_558677_FJ011138	227	27122	159102	30846	198538	164898	36170	36170
refbc_558677_FJ011139	227	27122	159102	30846	198538	164898	36170	36170
refbc_558677_FJ011140	227	27122	159102	30846	198538	164898	36170	36170
refbc_558677_FJ011141	227	27122	159102	30846	198538	164898	36170	36170
refbc_558677_FJ011142	227	27122	159102	30846	198538	164898	36170	36170
refbc_558677_FJ011143	227	27122	159102	30846	198538	164898	36170	36170
refbc_558677_FJ011144	227	27122	159102	30846	198538	164898	36170	36170
refbc_558677_FJ011145	227	27122	159102	30846	198538	164898	36170	36170
refbc_558677_FJ011146	227	27122	159102	30846	198538	164898	36170	36170
refbc_558677_FJ011147	227	27122	159102	30846	198538	164898	36170	36170
refbc_558678_FJ011148	227	27122	159102	30846	198538	164898	36170	36170
refbc_558678_FJ011149	227	27122	159102	30846	198538	164898	36170	36170
refbc_558678_FJ011150	227	27122	159102	30846	198538	164898	36170	36170
refbc_558678_FJ011151	227	27122	159102	30846	198538	164898	36170	36170
refbc_558678_FJ011152	227	27122	159102	30846	198538	164898	36170	36170
refbc_558679_FJ011153	227	27122	159102	30846	198538	164898	36170	36170
refbc_558679_FJ011154	227	27122	159102	30846	198538	164898	36170	36170
refbc_558679_FJ011155	227	27122	159102	30846	198538	164898	36170	36170
refbc_558679_FJ011156	227	27122	159102	30846	198538	164898	36170	36170
refbc_558679_FJ011157	227	27122	159102	30846	198538	164898	36170	36170
refbc_558679_FJ011158	227	27122	159102	30846	198538	164898	36170	36170
refbc_558680_FJ011159	227	27122	159102	30846	198538	164898	36170	36170
refbc_558680_FJ011160	227	27122	159102	30846	198538	164898	36170	36170
refbc_558680_FJ011161	227	27122	159102	30846	198538	164898	36170	36170
refbc_558680_FJ011162	227	27122	159102	30846	198538	164898	36170	36170
refbc_558680_FJ011163	227	27122	159102	30846	198538	164898	36170	36170
refbc_558681_FJ011164	227	27122	159102	30846	198538	164898	36170	36170
refbc_558681_FJ011165	227	27122	159102	30846	198538	164898	36170	36170
refbc_558681_FJ011166	227	27122	159102	30846	198538	164898	36170	36170
refbc_558681_FJ011167	227	27122	159102	30846	198538	164898	36170	36170
refbc_558681_FJ011168	227	27122	159102	30846	198538	164898	36170	36170
refbc_558682_FJ011169	239	31486	159102	30846	198538	164898	36170	36170
refbc_558682_FJ011170	239	31486	159102	30846	198538	164898	36170	36170
refbc_558682_FJ011171	239	31486	159102	30846	198538	164898	36170	36170
refbc_558682_FJ011172	239	31486	159102	30846	198538	164898	36170	36170
refbc_558682_FJ011173	239	31486	159102	30846	198538	164898	36170	36170
refbc_558683_FJ011179	227	27122	159102	30846	198538	164898	36170	36170
refbc_558683_FJ011180	227	27122	159102	30846	198538	164898	36170	36170
refbc_558683_FJ011181	227	27122	159102	30846	198538	164898	36170	36170
refbc_558683_FJ011182	227	27122	159102	30846	198538	164898	36170	36170
refbc_558683_FJ011183	227	27122	159102	30846	198538	164898	36170	36170
refbc_558684_FJ011184	227	27122	159102	30846	198538	164898	36170	36170
refbc_558684_FJ011185	227	27122	159102	30846	198538	164898	36170	36170
refbc_558684_FJ011186	227	27122	159102	30846	198538	164898	36170	36170
refbc_558684_FJ011187	227	27122	159102	30846	198538	164898	36170	36170
refbc_558684_FJ011188	227	27122	159102	30846	198538	164898	36170	36170
refbc_558685_FJ011189	227	27122	159102	30846	198538	164898	36170	36170
refbc_558685_FJ011190	227	27122	159102	30846	198538	164898	36170	36170
refbc_558685_FJ011191	227	27122	159102	30846	198538	164898	36170	36170
refbc_558685_FJ011192	227	27122	159102	30846	198538	164898	36170	36170
refbc_558685_FJ011193	227	27122	159102	30846	198538	164898	36170	36170
refbc_561567_FJ968181	517	56342	218742	66302	270362	234322	67222	67222
refbc_57577_FJ395384	315	36170	178982	51262	218722	181718	48942	48942
refbc_578887_AB494655	351	41174	187502	51262	235542	198538	48942	48942
refbc_578889_AB494661	351	41174	187502	51262	235542	198538	48942	48942
refbc_578889_AB494662	351	41174	187502	51262	235542	198538	48942	48942
refbc_58331_FN674507	303	36170	178982	35490	218722	181718	41174	41174
refbc_58331_FN674508	303	36170	178982	35490	218722	181718	41174	41174
refbc_58331_FN674509	303	36170	178982	35490	218722	181718	41174	41174
refbc_58332_FN674506	303	36170	178982	35490	218722	181718	41174	41174
refbc_58334_FN674513	303	36170	178982	35490	218722	181718	41174	41174
refbc_58334_FN674514	303	36170	178982	35490	218722	181718	41174	41174
refbc_58334_FN674515	303	36170	178982	35490	218722	181718	41174	41174
refbc_58335_FN674487	303	36170	178982	35490	218722	181718	41174	41174
refbc_58335_FN674511	303	36170	178982	35490	218722	181718	41174	41174
refbc_58335_FN674512	303	36170	178982	35490	218722	181718	41174	41174
refbc_58486_GQ982000	501	56342	207382	66302	261362	226522	67222	67222
refbc_58530_DQ420041	522	56342	218742	66302	270362	234322	67222	67222
refbc_585810_FJ197222	281	31486	170462	35490	218722	181718	41174	41174
refbc_585811_FJ197225	280	31486	170462	35490	218722	181718	41174	41174
refbc_585812_FJ197226	259	31486	170462	30846	198538	164898	36170	36170
refbc_585813_FJ197231	271	31486	170462	35490	218722	181718	41174	41174
refbc_585814_FJ197232	264	31486	170462	35490	218722	181718	41174	41174
refbc_585815_FJ197236	281	31486	170462	35490	218722	181718	41174	41174
refbc_585816_FJ197238	263	31486	170462	35490	218722	181718	41174	41174
refbc_585817_FJ197242	265	31486	170462	35490	218722	181718	41174	41174
refbc_585818_FJ197244	263	31486	170462	35490	218722	181718	41174	41174
refbc_585819_FJ197251	234	27122	159102	30846	198538	164898	36170	36170
refbc_585820_FJ197252	267	31486	170462	35490	218722	181718	41174	41174
refbc_585821_FJ197253	267	31486	170462	35490	218722	181718	41174	41174
refbc_585822_FJ197254	266	31486	170462	35490	218722	181718	41174	41174
refbc_585823_FJ197255	267	31486	170462	35490	218722	181718	41174	41174
refbc_585825_FJ197258	263	31486	170462	35490	218722	181718	41174	41174
refbc_585826_FJ197260	264	31486	170462	35490	218722	181718	41174	41174
refbc_585827_FJ197264	264	31486	170462	35490	218722	181718	41174	41174
refbc_585828_FJ197266	264	31486	170462	35490	218722	181718	41174	41174
refbc_585829_FJ197267	169	21434	150582	20914	181718	144714	27122	27122
refbc_58886_AY944558	166	21434	150582	20914	181718	144714	27122	27122
refbc_58933_DQ420014	522	56342	218742	66302	270362	234322	67222	67222
refbc_58933_DQ420019	522	56342	218742	66302	270362	234322	67222	67222
refbc_58933_DQ420033	522	56342	218742	66302	270362	234322	67222	67222
refbc_58946_AJ580605	168	21434	150582	20914	181718	144714	27122	27122
refbc_58955_AJ580615	186	21434	150582	24758	198538	164898	31486	31486
refbc_59116_GU945044	384	41174	187502	51262	235542	198538	54662	54662
refbc_592745_FJ014101	456	48942	207382	66302	252362	218722	60782	60782
refbc_592745_FJ014102	456	48942	207382	66302	252362	218722	60782	60782
refbc_592752_FJ014096	456	48942	207382	66302	252362	218722	60782	60782
refbc_592752_FJ014097	456	48942	207382	66302	252362	218722	60782	60782
refbc_592768_FJ014120	432	48942	198862	66302	252362	218722	60782	60782
refbc_592768_FJ014121	420	48942	198862	66302	235542	198538	60782	60782
refbc_59324_AY708008	512	56342	218742	66302	261362	226522	67222	67222
refbc_59353_AY708009	512	56342	218742	66302	261362	226522	67222	67222
refbc_59993_AF007947	303	36170	178982	35490	218722	181718	41174	41174
refbc_60095_AJ388200	386	41174	187502	51262	235542	198538	54662	54662
refbc_60095_AJ388270	253	31486	170462	30846	198538	164898	36170	36170
refbc_60419_AY042426	316	36170	178982	51262	218722	181718	48942	48942
refbc_60419_AY042427	316	36170	178982	51262	218722	181718	48942	48942
refbc_60419_AY042439	456	48942	207382	66302	252362	218722	60782	60782
refbc_60419_AY042440	456	48942	207382	66302	252362	218722	60782	60782
refbc_60419_U92862	464	48942	207382	66302	252362	218722	60782	60782
refbc_60423_AY042400	430	48942	198862	66302	252362	218722	60782	60782
refbc_60423_AY853783	441	48942	198862	66302	252362	218722	60782	60782
refbc_60423_AY853784	441	48942	198862	66302	252362	218722	60782	60782
refbc_60423_AY853785	441	48942	198862	66302	252362	218722	60782	60782
refbc_60423_AY853786	441	48942	198862	66302	252362	218722	60782	60782
refbc_60423_AY853787	441	48942	198862	66302	252362	218722	60782	60782
refbc_60423_AY853788	441	48942	198862	66302	252362	218722	60782	60782
refbc_60423_AY853789	441	48942	198862	66302	252362	218722	60782	60782
refbc_60423_AY853790	441	48942	198862	66302	252362	218722	60782	60782
refbc_60423_AY853791	441	48942	198862	66302	252362	218722	60782	60782
refbc_60423_AY853792	441	48942	198862	66302	252362	218722	60782	60782
refbc_60423_AY853793	441	48942	198862	66302	252362	218722	60782	60782
refbc_60423_AY853794	441	48942	198862	66302	252362	218722	60782	60782
refbc_60423_AY853795	441	48942	198862	66302	252362	218722	60782	60782
refbc_60423_AY853796	441	48942	198862	66302	252362	218722	60782	60782
refbc_60423_AY853797	441	48942	198862	66302	252362	218722	60782	60782
refbc_60423_AY853798	441	48942	198862	66302	252362	218722	60782	60782
refbc_60423_AY853799	441	48942	198862	66302	252362	218722	60782	60782
refbc_60423_AY853800	441	48942	198862	66302	252362	218722	60782	60782
refbc_60423_AY853801	441	48942	198862	66302	252362	218722	60782	60782
refbc_60423_AY853802	441	48942	198862	66302	252362	218722	60782	60782
refbc_60423_AY853803	441	48942	198862	66302	252362	218722	60782	60782
refbc_60423_AY853804	441	48942	198862	66302	252362	218722	60782	60782
refbc_60423_EF138803	441	48942	198862	66302	252362	218722	60782	60782
refbc_60423_EF138804	441	48942	198862	66302	252362	218722	60782	60782
refbc_60423_EF138805	441	48942	198862	66302	252362	218722	60782	60782
refbc_60423_U92861	464	48942	207382	66302	252362	218722	60782	60782
refbc_60424_U92865	353	41174	187502	51262	235542	198538	48942	48942
refbc_60863_AM920163	449	48942	207382	66302	252362	218722	60782	60782
refbc_61590_AY265182	443	48942	198862	66302	252362	218722	60782	60782
refbc_62329_AB026335	326	36170	178982	51262	235542	198538	48942	48942
refbc_62331_AB026330	329	36170	178982	51262	235542	198538	48942	48942
refbc_62331_AB026331	329	36170	178982	51262	235542	198538	48942	48942
refbc_62331_AB026332	329	36170	178982	51262	235542	198538	48942	48942
refbc_62859_AY708010	515	56342	218742	66302	270362	234322	67222	67222
refbc_62860_AY708013	512	56342	218742	66302	261362	226522	67222	67222
refbc_62861_AY708019	515	56342	218742	66302	270362	234322	67222	67222
refbc_62862_AY708026	509	56342	207382	66302	261362	226522	67222	67222
refbc_62863_AY708027	515	56342	218742	66302	270362	234322	67222	67222
refbc_62864_AY708029	515	56342	218742	66302	270362	234322	67222	67222
refbc_62865_AY714747	515	56342	218742	66302	270362	234322	67222	67222
refbc_62866_AY708033	512	56342	218742	66302	261362	226522	67222	67222
refbc_62867_AY708039	515	56342	218742	66302	270362	234322	67222	67222
refbc_63422_AY042394	430	48942	198862	66302	252362	218722	60782	60782
refbc_63422_AY042395	430	48942	198862	66302	252362	218722	60782	60782
refbc_63809_GQ302625	355	41174	187502	51262	235542	198538	48942	48942
refbc_64173_AF013757	555	65382	218742	80062	282266	243942	77062	77062
refbc_64421_AF014068	555	65382	218742	80062	282266	243942	77062	77062
refbc_64421_AF120141	555	65382	218742	80062	282266	243942	77062	77062
refbc_64423_AF014070	555	65382	218742	80062	282266	243942	77062	77062
refbc_64424_AF014065	554	65382	218742	80062	282266	243942	77062	77062
refbc_64430_AF014059	561	65382	218742	80062	282266	243942	77062	77062
refbc_64434_AF014073	555	65382	218742	80062	282266	243942	77062	77062
refbc_64435_AF014074	555	65382	218742	80062	282266	243942	77062	77062
refbc_65042_AY949762	454	48942	207382	66302	252362	218722	60782	60782
refbc_65042_AY949769	454	48942	207382	66302	252362	218722	60782	60782
refbc_65044_AY949767	454	48942	207382	66302	252362	218722	60782	60782
refbc_652456_AB507934	549	56342	218742	66302	272546	235542	77062	77062
refbc_652456_AB507935	549	56342	218742	66302	272546	235542	77062	77062
refbc_652456_AB507936	549	56342	218742	66302	272546	235542	77062	77062
refbc_652456_AB507937	549	56342	218742	66302	272546	235542	77062	77062
refbc_652456_AB534775	549	56342	218742	66302	272546	235542	77062	77062
refbc_652458_AB507939	549	56342	218742	66302	272546	235542	77062	77062
refbc_652458_AB507940	549	56342	218742	66302	272546	235542	77062	77062
refbc_65535_EU749497	595	65382	227262	80062	301706	260742	77062	77062
refbc_65535_EU749498	395	41174	198862	51262	235542	198538	54662	54662
refbc_655449_FJ786730	357	41174	187502	51262	235542	198538	48942	48942
refbc_655449_FJ786731	357	41174	187502	51262	235542	198538	48942	48942
refbc_655450_FJ786726	357	41174	187502	51262	235542	198538	48942	48942
refbc_655450_FJ786728	357	41174	187502	51262	235542	198538	48942	48942
refbc_655450_FJ786729	357	41174	187502	51262	235542	198538	48942	48942
refbc_659592_GU934741	487	56342	207382	66302	252362	218722	67222	67222
refbc_659592_GU934742	487	56342	207382	66302	252362	218722	67222	67222
refbc_659592_GU934743	487	56342	207382	66302	252362	218722	67222	67222
refbc_659593_GU934744	487	56342	207382	66302	252362	218722	67222	67222
refbc_659593_GU934745	487	56342	207382	66302	252362	218722	67222	67222
refbc_659593_GU934746	487	56342	207382	66302	252362	218722	67222	67222
refbc_659593_GU934747	487	56342	207382	66302	252362	218722	67222	67222
refbc_659593_GU934748	487	56342	207382	66302	252362	218722	67222	67222
refbc_659593_GU934749	487	56342	207382	66302	252362	218722	67222	67222
refbc_659593_GU934750	487	56342	207382	66302	252362	218722	67222	67222
refbc_659593_GU934751	487	56342	207382	66302	252362	218722	67222	67222
refbc_659593_GU934752	487	56342	207382	66302	252362	218722	67222	67222
refbc_659593_GU934753	487	56342	207382	66302	252362	218722	67222	67222
refbc_659593_GU934754	487	56342	207382	66302	252362	218722	67222	67222
refbc_659594_GU934782	487	56342	207382	66302	252362	218722	67222	67222
refbc_659594_GU934783	487	56342	207382	66302	252362	218722	67222	67222
refbc_659594_GU934784	487	56342	207382	66302	252362	218722	67222	67222
refbc_659594_GU934785	487	56342	207382	66302	252362	218722	67222	67222
refbc_659594_GU934786	487	56342	207382	66302	252362	218722	67222	67222
refbc_659594_GU934787	487	56342	207382	66302	252362	218722	67222	67222
refbc_659594_GU934788	487	56342	207382	66302	252362	218722	67222	67222
refbc_65993_EU489202	554	65382	218742	80062	282266	243942	77062	77062
refbc_65993_EU489203	554	65382	218742	80062	282266	243942	77062	77062
refbc_66173_EF395573	455	48942	207382	66302	252362	218722	60782	60782
refbc_66173_EF395574	455	48942	207382	66302	252362	218722	60782	60782
refbc_66205_FJ395381	541	56342	218742	66302	272546	235542	77062	77062
refbc_687718_GQ463908	199	27122	159102	24758	198538	164898	31486	31486
refbc_687718_GQ463909	196	27122	150582	24758	198538	164898	31486	31486
refbc_687730_GQ463901	196	27122	150582	24758	198538	164898	31486	31486
refbc_687730_GQ463902	199	27122	159102	24758	198538	164898	31486	31486
refbc_687749_GQ463883	199	27122	159102	24758	198538	164898	31486	31486
refbc_687749_GQ463884	199	27122	159102	24758	198538	164898	31486	31486
refbc_687752_GQ463888	199	27122	159102	24758	198538	164898	31486	31486
refbc_687752_GQ463889	199	27122	159102	24758	198538	164898	31486	31486
refbc_687757_GQ463925	199	27122	159102	24758	198538	164898	31486	31486
refbc_687757_GQ463926	199	27122	159102	24758	198538	164898	31486	31486
refbc_687762_GQ463936	199	27122	159102	24758	198538	164898	31486	31486
refbc_687762_GQ463937	199	27122	159102	24758	198538	164898	31486	31486
refbc_687764_GQ463943	199	27122	159102	24758	198538	164898	31486	31486
refbc_687764_GQ463944	199	27122	159102	24758	198538	164898	31486	31486
refbc_703359_GQ163376	362	41174	187502	51262	235542	198538	48942	48942
refbc_703387_GQ163438	366	41174	187502	51262	235542	198538	48942	48942
refbc_72153_DQ846519	153	21434	139222	20914	181718	144714	21434	21434
refbc_72153_DQ846520	153	21434	139222	20914	181718	144714	21434	21434
refbc_72153_DQ846521	153	21434	139222	20914	181718	144714	21434	21434
refbc_72153_DQ846522	153	21434	139222	20914	181718	144714	21434	21434
refbc_72153_DQ846523	153	21434	139222	20914	181718	144714	21434	21434
refbc_72153_DQ846524	153	21434	139222	20914	181718	144714	21434	21434
refbc_72153_DQ846525	153	21434	139222	20914	181718	144714	21434	21434
refbc_72153_DQ846526	153	21434	139222	20914	181718	144714	21434	21434
refbc_72153_DQ846527	153	21434	139222	20914	181718	144714	21434	21434
refbc_72153_DQ846555	153	21434	139222	20914	181718	144714	21434	21434
refbc_72153_DQ846556	153	21434	139222	20914	181718	144714	21434	21434
refbc_72153_DQ846557	152	21434	139222	20914	181718	144714	21434	21434
refbc_72153_DQ846615	153	21434	139222	20914	181718	144714	21434	21434
refbc_72153_DQ846616	153	21434	139222	20914	181718	144714	21434	21434
refbc_72153_DQ846617	153	21434	139222	20914	181718	144714	21434	21434
refbc_72153_DQ846618	152	21434	139222	20914	181718	144714	21434	21434
refbc_72153_DQ846619	153	21434	139222	20914	181718	144714	21434	21434
refbc_72153_DQ846620	153	21434	139222	20914	181718	144714	21434	21434
refbc_72371_EU812040	259	31486	170462	30846	198538	164898	36170	36170
refbc_74954_GQ302626	355	41174	187502	51262	235542	198538	48942	48942
refbc_752791_GU934739	487	56342	207382	66302	252362	218722	67222	67222
refbc_752791_GU934740	487	56342	207382	66302	252362	218722	67222	67222
refbc_752792_GU934764	487	56342	207382	66302	252362	218722	67222	67222
refbc_752792_GU934765	487	56342	207382	66302	252362	218722	67222	67222
refbc_752792_GU934766	487	56342	207382	66302	252362	218722	67222	67222
refbc_752792_GU934767	487	56342	207382	66302	252362	218722	67222	67222
refbc_752792_GU934768	487	56342	207382	66302	252362	218722	67222	67222
refbc_752792_GU934769	487	56342	207382	66302	252362	218722	67222	67222
refbc_752792_GU934770	487	56342	207382	66302	252362	218722	67222	67222
refbc_752792_GU934771	487	56342	207382	66302	252362	218722	67222	67222
refbc_752794_GU934772	487	56342	207382	66302	252362	218722	67222	67222
refbc_752794_GU934773	487	56342	207382	66302	252362	218722	67222	67222
refbc_752794_GU934774	487	56342	207382	66302	252362	218722	67222	67222
refbc_752794_GU934775	487	56342	207382	66302	252362	218722	67222	67222
refbc_752795_GU934776	487	56342	207382	66302	252362	218722	67222	67222
refbc_752795_GU934777	487	56342	207382	66302	252362	218722	67222	67222
refbc_752795_GU934778	487	56342	207382	66302	252362	218722	67222	67222
refbc_752795_GU934779	487	56342	207382	66302	252362	218722	67222	67222
refbc_752795_GU934780	487	56342	207382	66302	252362	218722	67222	67222
refbc_752795_GU934781	487	56342	207382	66302	252362	218722	67222	67222
refbc_752797_GU934789	487	56342	207382	66302	252362	218722	67222	67222
refbc_752797_GU934790	487	56342	207382	66302	252362	218722	67222	67222
refbc_752797_GU934791	487	56342	207382	66302	252362	218722	67222	67222
refbc_752797_GU934792	487	56342	207382	66302	252362	218722	67222	67222
refbc_752797_GU934793	487	56342	207382	66302	252362	218722	67222	67222
refbc_752798_GU934794	487	56342	207382	66302	252362	218722	67222	67222
refbc_752798_GU934795	487	56342	207382	66302	252362	218722	67222	67222
refbc_752798_GU934796	487	56342	207382	66302	252362	218722	67222	67222
refbc_752798_GU934797	487	56342	207382	66302	252362	218722	67222	67222
refbc_752799_GU934798	487	56342	207382	66302	252362	218722	67222	67222
refbc_752799_GU934799	487	56342	207382	66302	252362	218722	67222	67222
refbc_752799_GU934800	487	56342	207382	66302	252362	218722	67222	67222
refbc_752799_GU934801	487	56342	207382	66302	252362	218722	67222	67222
refbc_752799_GU934802	487	56342	207382	66302	252362	218722	67222	67222
refbc_752799_GU934803	487	56342	207382	66302	252362	218722	67222	67222
refbc_752799_GU934804	487	56342	207382	66302	252362	218722	67222	67222
refbc_752799_GU934805	487	56342	207382	66302	252362	218722	67222	67222
refbc_752799_GU934806	487	56342	207382	66302	252362	218722	67222	67222
refbc_752800_GU934807	487	56342	207382	66302	252362	218722	67222	67222
refbc_752800_GU934808	487	56342	207382	66302	252362	218722	67222	67222
refbc_752800_GU934809	487	56342	207382	66302	252362	218722	67222	67222
refbc_752800_GU934810	487	56342	207382	66302	252362	218722	67222	67222
refbc_752800_GU934811	487	56342	207382	66302	252362	218722	67222	67222
refbc_752800_GU934812	487	56342	207382	66302	252362	218722	67222	67222
refbc_752800_GU934813	487	56342	207382	66302	252362	218722	67222	67222
refbc_752801_GU934814	487	56342	207382	66302	252362	218722	67222	67222
refbc_752801_GU934815	487	56342	207382	66302	252362	218722	67222	67222
refbc_752801_GU934816	487	56342	207382	66302	252362	218722	67222	67222
refbc_75704_AJ849580	333	36170	178982	51262	235542	198538	48942	48942
refbc_75706_AJ849583	333	36170	178982	51262	235542	198538	48942	48942
refbc_75706_EU749389	597	65382	227262	80062	301706	260742	77062	77062
refbc_75715_AJ849582	333	36170	178982	51262	235542	198538	48942	48942
refbc_75745_EU749287	590	65382	227262	80062	291986	252342	77062	77062
refbc_75745_EU749288	591	65382	227262	80062	291986	252342	77062	77062
refbc_76276_AF459995	336	36170	178982	51262	235542	198538	48942	48942
refbc_76276_AY554089	178	21434	150582	24758	181718	144714	27122	27122
refbc_76276_DQ208169	346	36170	187502	51262	235542	198538	48942	48942
refbc_76578_AY350642	218	27122	159102	30846	198538	164898	31486	31486
refbc_77063_AJ849581	333	36170	178982	51262	235542	198538	48942	48942
refbc_77065_AJ849584	333	36170	178982	51262	235542	198538	48942	48942
refbc_77069_AJ849585	333	36170	178982	51262	235542	198538	48942	48942
refbc_77108_AF117076	543	56342	218742	66302	272546	235542	77062	77062
refbc_77602_DQ420036	522	56342	218742	66302	270362	234322	67222	67222
refbc_77603_DQ420004	448	48942	198862	66302	252362	218722	60782	60782
refbc_77603_DQ420037	522	56342	218742	66302	270362	234322	67222	67222
refbc_78262_EF395569	455	48942	207382	66302	252362	218722	60782	60782
refbc_78794_AB289521	565	65382	218742	80062	282266	243942	77062	77062
refbc_82697_AJ011433	386	41174	187502	51262	235542	198538	54662	54662
refbc_82697_AJ011461	281	31486	170462	35490	218722	181718	41174	41174
refbc_82699_AJ011434	386	41174	187502	51262	235542	198538	54662	54662
refbc_82699_AJ011460	281	31486	170462	35490	218722	181718	41174	41174
refbc_82701_AJ010506	386	41174	187502	51262	235542	198538	54662	54662
refbc_82701_AJ011435	281	31486	170462	35490	218722	181718	41174	41174
refbc_82703_AJ010507	386	41174	187502	51262	235542	198538	54662	54662
refbc_82703_AJ011436	281	31486	170462	35490	218722	181718	41174	41174
refbc_82704_AJ010508	386	41174	187502	51262	235542	198538	54662	54662
refbc_82704_AJ010509	362	41174	187502	51262	235542	198538	48942	48942
refbc_82704_AJ011437	281	31486	170462	35490	218722	181718	41174	41174
refbc_82708_AJ010510	383	41174	187502	51262	235542	198538	54662	54662
refbc_82708_AJ011439	281	31486	170462	35490	218722	181718	41174	41174
refbc_82710_AJ010511	380	41174	187502	51262	235542	198538	54662	54662
refbc_82710_AJ011440	281	31486	170462	35490	218722	181718	41174	41174
refbc_82711_AJ010512	386	41174	187502	51262	235542	198538	54662	54662
refbc_82711_AJ011441	252	31486	170462	30846	198538	164898	36170	36170
refbc_82713_AJ010513	386	41174	187502	51262	235542	198538	54662	54662
refbc_82713_AJ011442	281	31486	170462	35490	218722	181718	41174	41174
refbc_82714_AJ010518	383	41174	187502	51262	235542	198538	54662	54662
refbc_82714_AJ011447	281	31486	170462	35490	218722	181718	41174	41174
refbc_82716_AJ010520	386	41174	187502	51262	235542	198538	54662	54662
refbc_82716_AJ011449	281	31486	170462	35490	218722	181718	41174	41174
refbc_82718_AJ010521	386	41174	187502	51262	235542	198538	54662	54662
refbc_82718_AJ011450	281	31486	170462	35490	218722	181718	41174	41174
refbc_82720_AJ010522	386	41174	187502	51262	235542	198538	54662	54662
refbc_82720_AJ011451	281	31486	170462	35490	218722	181718	41174	41174
refbc_82722_AJ010523	386	41174	187502	51262	235542	198538	54662	54662
refbc_82722_AJ011452	281	31486	170462	35490	218722	181718	41174	41174
refbc_82724_AJ010524	359	41174	187502	51262	235542	198538	48942	48942
refbc_82724_AJ011453	281	31486	170462	35490	218722	181718	41174	41174
refbc_82726_AJ010525	386	41174	187502	51262	235542	198538	54662	54662
refbc_82726_AJ011454	281	31486	170462	35490	218722	181718	41174	41174
refbc_82728_AJ010526	386	41174	187502	51262	235542	198538	54662	54662
refbc_82728_AJ011455	281	31486	170462	35490	218722	181718	41174	41174
refbc_82730_AJ010527	374	41174	187502	51262	235542	198538	54662	54662
refbc_82730_AJ011456	281	31486	170462	35490	218722	181718	41174	41174
refbc_82732_AJ010529	386	41174	187502	51262	235542	198538	54662	54662
refbc_82732_AJ011458	260	31486	170462	35490	198538	164898	36170	36170
refbc_82734_AJ010530	380	41174	187502	51262	235542	198538	54662	54662
refbc_82734_AJ011459	281	31486	170462	35490	218722	181718	41174	41174
refbc_82737_AJ010516	386	41174	187502	51262	235542	198538	54662	54662
refbc_82737_AJ011445	281	31486	170462	35490	218722	181718	41174	41174
refbc_83587_AJ388201	380	41174	187502	51262	235542	198538	54662	54662
refbc_83587_AJ388271	279	31486	170462	35490	218722	181718	41174	41174
refbc_84585_AY929860	167	21434	150582	20914	181718	144714	27122	27122
refbc_84585_EF537909	346	36170	187502	51262	235542	198538	48942	48942
refbc_84793_AJ388187	387	41174	187502	51262	235542	198538	54662	54662
refbc_84793_AJ388257	281	31486	170462	35490	218722	181718	41174	41174
refbc_84810_AJ388202	352	41174	187502	51262	235542	198538	48942	48942
refbc_84810_AJ388272	281	31486	170462	35490	218722	181718	41174	41174
refbc_84868_AJ388141	386	41174	187502	51262	235542	198538	54662	54662
refbc_84868_AJ388210	282	31486	170462	35490	218722	181718	41174	41174
refbc_84871_AJ388142	372	41174	187502	51262	235542	198538	54662	54662
refbc_84871_AJ388211	238	31486	159102	30846	198538	164898	36170	36170
refbc_84872_AJ388143	386	41174	187502	51262	235542	198538	54662	54662
refbc_84872_AJ388212	281	31486	170462	35490	218722	181718	41174	41174
refbc_84874_AJ388146	386	41174	187502	51262	235542	198538	54662	54662
refbc_84874_AJ388215	281	31486	170462	35490	218722	181718	41174	41174
refbc_84876_AJ388148	383	41174	187502	51262	235542	198538	54662	54662
refbc_84876_AJ388217	281	31486	170462	35490	218722	181718	41174	41174
refbc_84878_AJ388150	380	41174	187502	51262	235542	198538	54662	54662
refbc_84878_AJ388219	281	31486	170462	35490	218722	181718	41174	41174
refbc_84880_AJ388153	354	41174	187502	51262	235542	198538	48942	48942
refbc_84880_AJ388222	281	31486	170462	35490	218722	181718	41174	41174
refbc_84882_AJ388154	370	41174	187502	51262	235542	198538	54662	54662
refbc_84882_AJ388223	251	31486	170462	30846	198538	164898	36170	36170
refbc_84883_AJ388155	392	41174	198862	51262	235542	198538	54662	54662
refbc_84883_AJ388224	254	31486	170462	30846	198538	164898	36170	36170
refbc_84885_AJ388156	386	41174	187502	51262	235542	198538	54662	54662
refbc_84885_AJ388225	281	31486	170462	35490	218722	181718	41174	41174
refbc_84887_AJ388159	348	41174	187502	51262	235542	198538	48942	48942
refbc_84887_AJ388228	281	31486	170462	35490	218722	181718	41174	41174
refbc_84888_AJ388160	368	41174	187502	51262	235542	198538	54662	54662
refbc_84888_AJ388229	281	31486	170462	35490	218722	181718	41174	41174
refbc_84891_AJ388161	386	41174	187502	51262	235542	198538	54662	54662
refbc_84891_AJ388231	281	31486	170462	35490	218722	181718	41174	41174
refbc_84892_AJ406329	384	41174	187502	51262	235542	198538	54662	54662
refbc_84892_AJ406357	277	31486	170462	35490	218722	181718	41174	41174
refbc_84893_AJ388163	286	31486	170462	35490	218722	181718	41174	41174
refbc_84893_AJ388233	286	31486	170462	35490	218722	181718	41174	41174
refbc_84894_AJ406345	386	41174	187502	51262	235542	198538	54662	54662
refbc_84894_AJ406373	277	31486	170462	35490	218722	181718	41174	41174
refbc_84895_AJ388169	386	41174	187502	51262	235542	198538	54662	54662
refbc_84895_AJ388239	290	36170	178982	35490	218722	181718	41174	41174
refbc_84897_AJ388170	380	41174	187502	51262	235542	198538	54662	54662
refbc_84897_AJ388240	281	31486	170462	35490	218722	181718	41174	41174
refbc_84902_AJ388171	386	41174	187502	51262	235542	198538	54662	54662
refbc_84902_AJ388241	281	31486	170462	35490	218722	181718	41174	41174
refbc_84907_AJ388175	380	41174	187502	51262	235542	198538	54662	54662
refbc_84907_AJ388245	281	31486	170462	35490	218722	181718	41174	41174
refbc_84909_AJ388176	386	41174	187502	51262	235542	198538	54662	54662
refbc_84909_AJ388246	281	31486	170462	35490	218722	181718	41174	41174
refbc_84911_AJ388179	386	41174	187502	51262	235542	198538	54662	54662
refbc_84911_AJ388249	281	31486	170462	35490	218722	181718	41174	41174
refbc_84913_AJ388180	386	41174	187502	51262	235542	198538	54662	54662
refbc_84913_AJ388250	287	31486	178982	35490	218722	181718	41174	41174
refbc_84917_AJ388185	365	41174	187502	51262	235542	198538	48942	48942
refbc_84917_AJ388255	277	31486	170462	35490	218722	181718	41174	41174
refbc_84918_AJ388186	388	41174	187502	51262	235542	198538	54662	54662
refbc_84918_AJ388256	281	31486	170462	35490	218722	181718	41174	41174
refbc_84919_AJ388188	380	41174	187502	51262	235542	198538	54662	54662
refbc_84919_AJ388258	276	31486	170462	35490	218722	181718	41174	41174
refbc_84921_AJ388189	383	41174	187502	51262	235542	198538	54662	54662
refbc_84921_AJ388259	281	31486	170462	35490	218722	181718	41174	41174
refbc_84921_FJ014114	447	48942	198862	66302	252362	218722	60782	60782
refbc_84922_AJ388190	386	41174	187502	51262	235542	198538	54662	54662
refbc_84922_AJ388260	252	31486	170462	30846	198538	164898	36170	36170
refbc_84923_AJ388192	386	41174	187502	51262	235542	198538	54662	54662
refbc_84923_AJ388262	290	36170	178982	35490	218722	181718	41174	41174
refbc_84927_AJ388194	386	41174	187502	51262	235542	198538	54662	54662
refbc_84927_AJ388264	281	31486	170462	35490	218722	181718	41174	41174
refbc_84929_AJ388195	386	41174	187502	51262	235542	198538	54662	54662
refbc_84929_AJ388265	281	31486	170462	35490	218722	181718	41174	41174
refbc_84931_AJ388196	386	41174	187502	51262	235542	198538	54662	54662
refbc_84931_AJ388266	287	31486	178982	35490	218722	181718	41174	41174
refbc_84933_AJ388198	386	41174	187502	51262	235542	198538	54662	54662
refbc_84933_AJ388268	275	31486	170462	35490	218722	181718	41174	41174
refbc_84934_AJ388137	386	41174	187502	51262	235542	198538	54662	54662
refbc_84934_AJ388206	281	31486	170462	35490	218722	181718	41174	41174
refbc_84938_AJ388139	366	41174	187502	51262	235542	198538	48942	48942
refbc_84938_AJ388208	281	31486	170462	35490	218722	181718	41174	41174
refbc_84940_AJ388157	364	41174	187502	51262	235542	198538	48942	48942
refbc_84940_AJ388226	281	31486	170462	35490	218722	181718	41174	41174
refbc_84941_AJ388158	386	41174	187502	51262	235542	198538	54662	54662
refbc_84941_AJ388227	287	31486	178982	35490	218722	181718	41174	41174
refbc_84947_AJ388203	380	41174	187502	51262	235542	198538	54662	54662
refbc_84947_AJ388273	280	31486	170462	35490	218722	181718	41174	41174
refbc_84951_AJ388183	386	41174	187502	51262	235542	198538	54662	54662
refbc_84951_AJ388253	281	31486	170462	35490	218722	181718	41174	41174
refbc_84952_AJ388184	386	41174	187502	51262	235542	198538	54662	54662
refbc_84952_AJ388254	277	31486	170462	35490	218722	181718	41174	41174
refbc_84953_AJ388205	371	41174	187502	51262	235542	198538	54662	54662
refbc_84953_AJ388275	251	31486	170462	30846	198538	164898	36170	36170
refbc_85040_AJ388162	386	41174	187502	51262	235542	198538	54662	54662
refbc_85040_AJ388232	281	31486	170462	35490	218722	181718	41174	41174
refbc_85042_AJ388199	380	41174	187502	51262	235542	198538	54662	54662
refbc_85042_AJ388269	273	31486	170462	35490	218722	181718	41174	41174
refbc_85152_AJ388144	392	41174	198862	51262	235542	198538	54662	54662
refbc_85152_AJ388213	281	31486	170462	35490	218722	181718	41174	41174
refbc_85183_EU669484	553	56342	218742	80062	282266	243942	77062	77062
refbc_85472_AB026328	329	36170	178982	51262	235542	198538	48942	48942
refbc_85472_AB026329	329	36170	178982	51262	235542	198538	48942	48942
refbc_85474_AB026314	329	36170	178982	51262	235542	198538	48942	48942
refbc_85474_AB026315	329	36170	178982	51262	235542	198538	48942	48942
refbc_85474_AB026316	329	36170	178982	51262	235542	198538	48942	48942
refbc_85474_AB026317	329	36170	178982	51262	235542	198538	48942	48942
refbc_85474_AB026318	329	36170	178982	51262	235542	198538	48942	48942
refbc_85474_AB026319	329	36170	178982	51262	235542	198538	48942	48942
refbc_85476_AB026299	329	36170	178982	51262	235542	198538	48942	48942
refbc_85476_AB026300	329	36170	178982	51262	235542	198538	48942	48942
refbc_85476_AB026301	329	36170	178982	51262	235542	198538	48942	48942
refbc_85476_AB026302	329	36170	178982	51262	235542	198538	48942	48942
refbc_85476_AB026303	329	36170	178982	51262	235542	198538	48942	48942
refbc_85476_AB026304	329	36170	178982	51262	235542	198538	48942	48942
refbc_85476_AB026305	329	36170	178982	51262	235542	198538	48942	48942
refbc_85476_AB026306	329	36170	178982	51262	235542	198538	48942	48942
refbc_85476_AB026307	329	36170	178982	51262	235542	198538	48942	48942
refbc_85476_AB026308	329	36170	178982	51262	235542	198538	48942	48942
refbc_85478_AB026323	329	36170	178982	51262	235542	198538	48942	48942
refbc_85478_AB026324	329	36170	178982	51262	235542	198538	48942	48942
refbc_85479_AB026309	329	36170	178982	51262	235542	198538	48942	48942
refbc_85479_AB026310	329	36170	178982	51262	235542	198538	48942	48942
refbc_85479_AB026311	329	36170	178982	51262	235542	198538	48942	48942
refbc_85479_AB026312	329	36170	178982	51262	235542	198538	48942	48942
refbc_85479_AB026313	329	36170	178982	51262	235542	198538	48942	48942
refbc_85622_EF395587	455	48942	207382	66302	252362	218722	60782	60782
refbc_85622_EF395588	455	48942	207382	66302	252362	218722	60782	60782
refbc_85622_EF395589	455	48942	207382	66302	252362	218722	60782	60782
refbc_85692_DQ420010	448	48942	198862	66302	252362	218722	60782	60782
refbc_85692_DQ420011	522	56342	218742	66302	270362	234322	67222	67222
refbc_86997_AJ388204	380	41174	187502	51262	235542	198538	54662	54662
refbc_86997_AJ388274	279	31486	170462	35490	218722	181718	41174	41174
refbc_88734_EF395571	455	48942	207382	66302	252362	218722	60782	60782
refbc_88856_FJ860982	358	41174	187502	51262	235542	198538	48942	48942
refbc_88856_FJ860983	358	41174	187502	51262	235542	198538	48942	48942
refbc_88856_FJ860984	358	41174	187502	51262	235542	198538	48942	48942
refbc_88856_FJ860985	358	41174	187502	51262	235542	198538	48942	48942
refbc_88856_FJ860986	358	41174	187502	51262	235542	198538	48942	48942
refbc_88856_FJ860987	358	41174	187502	51262	235542	198538	48942	48942
refbc_91541_AF120122	561	65382	218742	80062	282266	243942	77062	77062
refbc_91551_AF120125	561	65382	218742	80062	282266	243942	77062	77062
refbc_91557_AF120138	561	65382	218742	80062	282266	243942	77062	77062
refbc_91557_AF120139	561	65382	218742	80062	282266	243942	77062	77062
refbc_91603_AF120124	561	65382	218742	80062	282266	243942	77062	77062
refbc_93036_EU749331	324	36170	178982	51262	235542	198538	48942	48942
refbc_93501_AB026325	329	36170	178982	51262	235542	198538	48942	48942
refbc_93501_AB026326	329	36170	178982	51262	235542	198538	48942	48942
refbc_93501_AB026327	329	36170	178982	51262	235542	198538	48942	48942
refbc_93694_EF395577	455	48942	207382	66302	252362	218722	60782	60782
refbc_93694_EF395578	455	48942	207382	66302	252362	218722	60782	60782
refbc_93694_EF395579	455	48942	207382	66302	252362	218722	60782	60782
refbc_93694_EF395580	455	48942	207382	66302	252362	218722	60782	60782
refbc_93694_EF395581	455	48942	207382	66302	252362	218722	60782	60782
refbc_93694_EF395582	455	48942	207382	66302	252362	218722	60782	60782
refbc_93694_EF395583	455	48942	207382	66302	252362	218722	60782	60782
refbc_93694_EF395584	455	48942	207382	66302	252362	218722	60782	60782
refbc_93694_EF395585	455	48942	207382	66302	252362	218722	60782	60782
refbc_93694_EF395586	455	48942	207382	66302	252362	218722	60782	60782
refbc_93696_EF395599	455	48942	207382	66302	252362	218722	60782	60782
refbc_93696_EF395600	455	48942	207382	66302	252362	218722	60782	60782
refbc_93938_FN674510	303	36170	178982	35490	218722	181718	41174	41174
refbc_94426_AJ388140	386	41174	187502	51262	235542	198538	54662	54662
refbc_94426_AJ388209	281	31486	170462	35490	218722	181718	41174	41174
refbc_94427_AJ388138	386	41174	187502	51262	235542	198538	54662	54662
refbc_94427_AJ388207	281	31486	170462	35490	218722	181718	41174	41174
refbc_94429_AJ388151	375	41174	187502	51262	235542	198538	54662	54662
refbc_94429_AJ388220	281	31486	170462	35490	218722	181718	41174	41174
refbc_94431_AJ388197	376	41174	187502	51262	235542	198538	54662	54662
refbc_94431_AJ388267	281	31486	170462	35490	218722	181718	41174	41174
refbc_98722_AF460007	336	36170	178982	51262	235542	198538	48942	48942
refbc_98722_AY156987	326	36170	178982	51262	235542	198538	48942	48942
refbc_98722_AY554084	178	21434	150582	24758	181718	144714	27122	27122
refbc_99294_GQ982013	516	56342	218742	66302	270362	234322	67222	67222
