# Supplementary material for: DNA Barcode Goes Two-Dimensions: DNA QR Code Web Server
Source: PLoS One. 2012 May 4;7(5):e35146. doi: 10.1371/journal.pone.0035146 (PMC3344831; doi:10.1371/journal.pone.0035146)
Supplement: Table S6 — Sizes for 2D barcodes encoded from DNA sequences for psbA-trnH. (XLS) [file pone.0035146.s007.xls]

## Sheet: Suppl_table6_psbA-trnH
Table S6: Sizes for 2D barcodes encoded from DNA sequences for psbA-trnH.
File name	Sequence length	Aztec_code	CodaBlock-F	Data_Matrix	PDF417	PDF417_Truncated	QR_code	QR_code_2005
refbc_100319_AB492622	323	36170	178982	53906	198862	167622	48942	48942
refbc_100319_AB492623	323	36170	178982	53906	198862	167622	48942	48942
refbc_100319_AB492624	323	36170	178982	53906	198862	167622	48942	48942
refbc_100319_AB492625	323	36170	178982	53906	198862	167622	48942	48942
refbc_100319_AB492626	323	36170	178982	53906	185142	156058	48942	48942
refbc_100319_AB492627	323	36170	178982	53906	198862	167622	48942	48942
refbc_100321_AB492506	317	36170	178982	53906	171922	142838	48942	48942
refbc_100321_AB492507	318	36170	178982	53906	184662	153422	48942	48942
refbc_100321_AB492508	317	36170	178982	53906	184662	153422	48942	48942
refbc_100321_AB492509	317	36170	178982	53906	171922	153422	48942	48942
refbc_100321_AB492510	317	36170	178982	53906	184662	153422	48942	48942
refbc_100321_AB492511	317	36170	178982	53906	171922	153422	48942	48942
refbc_100321_AB492512	317	36170	178982	53906	184662	153422	48942	48942
refbc_100321_AB492513	317	36170	178982	53906	184662	153422	48942	48942
refbc_100321_AB492514	317	36170	178982	53906	184662	153422	48942	48942
refbc_100321_AB492515	317	36170	178982	53906	171922	142838	48942	48942
refbc_100321_AB492516	317	36170	178982	53906	184662	153422	48942	48942
refbc_100321_AB492517	317	36170	178982	53906	184662	153422	48942	48942
refbc_100321_AB492518	318	36170	178982	53906	171922	153422	48942	48942
refbc_100321_AB492519	321	36170	178982	53906	198862	167622	48942	48942
refbc_100321_AB492520	321	36170	178982	53906	185142	167622	48942	48942
refbc_100321_AB492521	324	36170	178982	53906	185142	156058	48942	48942
refbc_100321_AB492522	322	36170	178982	53906	198862	167622	48942	48942
refbc_100321_AB492523	322	36170	178982	53906	198862	167622	48942	48942
refbc_100321_AB492524	324	36170	178982	53906	198862	167622	48942	48942
refbc_100321_AB492525	322	36170	178982	53906	185142	167622	48942	48942
refbc_100321_AB492526	322	36170	178982	53906	185142	156058	48942	48942
refbc_100321_AB492527	322	36170	178982	53906	185142	167622	48942	48942
refbc_100321_AB492528	322	36170	178982	53906	198862	167622	48942	48942
refbc_100321_AB492529	322	36170	178982	53906	198862	167622	48942	48942
refbc_100321_AB492530	322	36170	178982	53906	198862	167622	48942	48942
refbc_100321_AB492531	323	36170	178982	53906	198862	167622	48942	48942
refbc_100321_AB492532	322	36170	178982	53906	198862	167622	48942	48942
refbc_100321_AB492533	322	36170	178982	53906	185142	167622	48942	48942
refbc_100321_AB492534	324	36170	178982	53906	198862	167622	48942	48942
refbc_100322_AB492591	322	36170	178982	53906	185142	156058	48942	48942
refbc_100322_AB492592	334	36170	178982	53906	193542	167622	48942	48942
refbc_100322_AB492593	328	36170	178982	53906	198862	167622	48942	48942
refbc_100322_AB492594	323	36170	178982	53906	198862	167622	48942	48942
refbc_100322_AB492595	323	36170	178982	53906	198862	167622	48942	48942
refbc_100322_AB492596	323	36170	178982	53906	185142	156058	48942	48942
refbc_100322_AB492597	327	36170	178982	53906	198862	167622	48942	48942
refbc_100322_AB492598	329	36170	178982	53906	185142	167622	48942	48942
refbc_100322_AB492599	320	36170	178982	53906	198862	167622	48942	48942
refbc_100322_AB492600	327	36170	178982	53906	185142	156058	48942	48942
refbc_100322_AB492601	331	36170	178982	53906	193542	163138	48942	48942
refbc_100322_AB492602	320	36170	178982	53906	198862	167622	48942	48942
refbc_100322_AB492603	329	36170	178982	53906	198862	167622	48942	48942
refbc_100322_AB492604	323	36170	178982	53906	198862	167622	48942	48942
refbc_100322_AB492605	326	36170	178982	53906	198862	167622	48942	48942
refbc_100322_AB492606	321	36170	178982	53906	185142	167622	48942	48942
refbc_100322_AB492607	317	36170	178982	53906	184662	153422	48942	48942
refbc_100322_AB492608	342	36170	187502	53906	193542	163138	48942	48942
refbc_100322_AB492609	322	36170	178982	53906	185142	156058	48942	48942
refbc_100322_AB492610	322	36170	178982	53906	198862	167622	48942	48942
refbc_100322_AB492611	322	36170	178982	53906	198862	167622	48942	48942
refbc_100323_AB492535	322	36170	178982	53906	185142	167622	48942	48942
refbc_100323_AB492536	322	36170	178982	53906	198862	167622	48942	48942
refbc_100323_AB492537	322	36170	178982	53906	185142	156058	48942	48942
refbc_100323_AB492538	312	36170	178982	53906	184662	153422	48942	48942
refbc_100323_AB492539	323	36170	178982	53906	185142	156058	48942	48942
refbc_100323_AB492540	323	36170	178982	53906	198862	167622	48942	48942
refbc_100323_AB492541	312	36170	178982	53906	184662	153422	48942	48942
refbc_100323_AB492542	323	36170	178982	53906	185142	167622	48942	48942
refbc_100323_AB492543	323	36170	178982	53906	198862	167622	48942	48942
refbc_100323_AB492544	321	36170	178982	53906	185142	156058	48942	48942
refbc_100323_AB492545	321	36170	178982	53906	198862	167622	48942	48942
refbc_100323_AB492546	321	36170	178982	53906	185142	167622	48942	48942
refbc_100323_AB492547	324	36170	178982	53906	198862	167622	48942	48942
refbc_100323_AB492548	321	36170	178982	53906	185142	156058	48942	48942
refbc_100506_GQ434901	542	56426	218742	66394	272546	235542	77162	77162
refbc_100506_GQ434902	542	56426	218742	66394	272546	235542	77162	77162
refbc_100514_GQ434909	542	56426	218742	66394	272546	235542	77162	77162
refbc_100514_GQ434910	542	56426	218742	66394	272546	235542	77162	77162
refbc_100514_GQ434911	542	56426	218742	66394	272546	235542	77162	77162
refbc_100528_EU850231	552	56426	218742	83366	282266	243942	77162	77162
refbc_100528_EU850232	552	56426	218742	83366	282266	243942	77162	77162
refbc_100528_EU850240	563	65474	218742	83366	282266	243942	77162	77162
refbc_100528_GQ434900	538	56426	218742	66394	272546	235542	77162	77162
refbc_100555_GQ438012	340	36170	187502	53906	198862	167622	48942	48942
refbc_100555_GQ438013	340	36170	187502	53906	198862	167622	48942	48942
refbc_100555_GQ438014	340	36170	187502	53906	198862	167622	48942	48942
refbc_100555_GQ438015	340	36170	187502	53906	193542	163138	48942	48942
refbc_100555_GQ438016	340	36170	187502	53906	198862	167622	48942	48942
refbc_100555_GQ438017	340	36170	187502	53906	193542	163138	48942	48942
refbc_100555_GQ438018	340	36170	187502	53906	193542	167622	48942	48942
refbc_100555_GQ438019	346	36170	187502	53906	198862	167622	48942	48942
refbc_100555_GQ438020	340	36170	187502	53906	198862	167622	48942	48942
refbc_100555_GQ438021	346	36170	187502	53906	198862	167622	48942	48942
refbc_100555_GQ438022	340	36170	187502	53906	193542	167622	48942	48942
refbc_100555_GQ438023	340	36170	187502	53906	198862	167622	48942	48942
refbc_100555_GQ438024	340	36170	187502	53906	193542	163138	48942	48942
refbc_100555_GQ438025	340	36170	187502	53906	198862	167622	48942	48942
refbc_100555_GQ438026	340	36170	187502	53906	193542	163138	48942	48942
refbc_100555_GQ438027	340	36170	187502	53906	198862	167622	48942	48942
refbc_100555_GQ438028	340	36170	187502	53906	193542	163138	48942	48942
refbc_100555_GQ438029	340	36170	187502	53906	198862	167622	48942	48942
refbc_100555_GQ438030	340	36170	187502	53906	193542	167622	48942	48942
refbc_100555_GQ438031	340	36170	187502	53906	193542	163138	48942	48942
refbc_100555_GQ438032	340	36170	187502	53906	198862	167622	48942	48942
refbc_100555_GQ438033	340	36170	187502	53906	198862	167622	48942	48942
refbc_100555_GQ438034	340	36170	187502	53906	198862	167622	48942	48942
refbc_100555_GQ438035	340	36170	187502	53906	193542	167622	48942	48942
refbc_100555_GQ438036	340	36170	187502	53906	198862	167622	48942	48942
refbc_100555_GQ438037	340	36170	187502	53906	193542	167622	48942	48942
refbc_100555_GQ438038	340	36170	187502	53906	198862	167622	48942	48942
refbc_100555_GQ438039	340	36170	187502	53906	193542	167622	48942	48942
refbc_100555_GQ438040	340	36170	187502	53906	198862	167622	48942	48942
refbc_100555_GQ438041	340	36170	187502	53906	198862	167622	48942	48942
refbc_100555_GQ438042	340	36170	187502	53906	198862	167622	48942	48942
refbc_100555_GQ438043	340	36170	187502	53906	198862	167622	48942	48942
refbc_100555_GQ438044	340	36170	187502	53906	198862	167622	48942	48942
refbc_100555_GQ438045	340	36170	187502	53906	193542	167622	48942	48942
refbc_100555_GQ438046	340	36170	187502	53906	198862	167622	48942	48942
refbc_100555_GQ438047	340	36170	187502	53906	193542	163138	48942	48942
refbc_100555_GQ438048	340	36170	187502	53906	198862	167622	48942	48942
refbc_100555_GQ438049	340	36170	187502	53906	193542	163138	48942	48942
refbc_100555_GQ438050	340	36170	187502	53906	198862	167622	48942	48942
refbc_100555_GQ438051	341	36170	187502	53906	193542	163138	48942	48942
refbc_100555_GQ438052	341	36170	187502	53906	198862	167622	48942	48942
refbc_100555_GQ438053	341	36170	187502	53906	198862	167622	48942	48942
refbc_100555_GQ438054	341	36170	187502	53906	193542	167622	48942	48942
refbc_100555_GQ438055	340	36170	187502	53906	198862	167622	48942	48942
refbc_100555_GQ438056	340	36170	187502	53906	193542	163138	48942	48942
refbc_100555_GQ438057	346	36170	187502	53906	198862	167622	48942	48942
refbc_100555_GQ438058	340	36170	187502	53906	198862	167622	48942	48942
refbc_100555_GQ438059	340	36170	187502	53906	198862	167622	48942	48942
refbc_100555_GQ438060	340	36170	187502	53906	198862	167622	48942	48942
refbc_100555_GQ438061	340	36170	187502	53906	198862	167622	48942	48942
refbc_100555_GQ438062	340	36170	187502	53906	193542	163138	48942	48942
refbc_100555_GQ438063	340	36170	187502	53906	193542	167622	48942	48942
refbc_100555_GQ438064	340	36170	187502	53906	198862	167622	48942	48942
refbc_100555_GQ438065	340	36170	187502	53906	193542	163138	48942	48942
refbc_100555_GQ438066	340	36170	187502	53906	198862	167622	48942	48942
refbc_100555_GQ438067	340	36170	187502	53906	193542	167622	48942	48942
refbc_100555_GQ438068	340	36170	187502	53906	198862	167622	48942	48942
refbc_100555_GQ438069	340	36170	187502	53906	193542	163138	48942	48942
refbc_100555_GQ438070	340	36170	187502	53906	198862	167622	48942	48942
refbc_100555_GQ438071	340	36170	187502	53906	193542	167622	48942	48942
refbc_100555_GQ438072	340	36170	187502	53906	198862	167622	48942	48942
refbc_100555_GQ438073	340	36170	187502	53906	193542	163138	48942	48942
refbc_100555_GQ438074	340	36170	187502	53906	198862	167622	48942	48942
refbc_100555_GQ438075	340	36170	187502	53906	193542	163138	48942	48942
refbc_100555_GQ438076	340	36170	187502	53906	198862	167622	48942	48942
refbc_100555_GQ438077	340	36170	187502	53906	198862	167622	48942	48942
refbc_100555_GQ438078	340	36170	187502	53906	193542	167622	48942	48942
refbc_100555_GQ438079	340	36170	187502	53906	198862	167622	48942	48942
refbc_100555_GQ438080	340	36170	187502	53906	193542	167622	48942	48942
refbc_100555_GQ438081	340	36170	187502	53906	193542	163138	48942	48942
refbc_100555_GQ438082	340	36170	187502	53906	198862	167622	48942	48942
refbc_100555_GQ438083	340	36170	187502	53906	198862	167622	48942	48942
refbc_100555_GQ438084	340	36170	187502	53906	198862	167622	48942	48942
refbc_100555_GQ438085	340	36170	187502	53906	193542	167622	48942	48942
refbc_100555_GQ438086	340	36170	187502	53906	198862	167622	48942	48942
refbc_100555_GQ438087	340	36170	187502	53906	193542	163138	48942	48942
refbc_100555_GQ438088	340	36170	187502	53906	198862	167622	48942	48942
refbc_100555_GQ438089	340	36170	187502	53906	193542	167622	48942	48942
refbc_100555_GQ438090	340	36170	187502	53906	193542	163138	48942	48942
refbc_100555_GQ438091	340	36170	187502	53906	198862	167622	48942	48942
refbc_100555_GQ438092	340	36170	187502	53906	198862	167622	48942	48942
refbc_100555_GQ438093	341	36170	187502	53906	193542	167622	48942	48942
refbc_100555_GQ438094	340	36170	187502	53906	198862	167622	48942	48942
refbc_100555_GQ438095	341	36170	187502	53906	193542	163138	48942	48942
refbc_100555_GQ438096	340	36170	187502	53906	193542	167622	48942	48942
refbc_100555_GQ438097	340	36170	187502	53906	198862	167622	48942	48942
refbc_100555_GQ438098	340	36170	187502	53906	198862	167622	48942	48942
refbc_100555_GQ438099	340	36170	187502	53906	193542	167622	48942	48942
refbc_100555_GQ438100	340	36170	187502	53906	198862	167622	48942	48942
refbc_100555_GQ438101	340	36170	187502	53906	198862	167622	48942	48942
refbc_100555_GQ438102	340	36170	187502	53906	198862	167622	48942	48942
refbc_100555_GQ438103	340	36170	187502	53906	193542	167622	48942	48942
refbc_100555_GQ438104	340	36170	187502	53906	198862	167622	48942	48942
refbc_100555_GQ438105	340	36170	187502	53906	193542	167622	48942	48942
refbc_100555_GQ438106	340	36170	187502	53906	198862	167622	48942	48942
refbc_100555_GQ438107	340	36170	187502	53906	193542	163138	48942	48942
refbc_100555_GQ438108	340	36170	187502	53906	193542	167622	48942	48942
refbc_100555_GQ438109	340	36170	187502	53906	198862	167622	48942	48942
refbc_100555_GQ438110	340	36170	187502	53906	198862	167622	48942	48942
refbc_100555_GQ438111	340	36170	187502	53906	198862	167622	48942	48942
refbc_100555_GQ438112	340	36170	187502	53906	198862	167622	48942	48942
refbc_100555_GQ438113	340	36170	187502	53906	193542	167622	48942	48942
refbc_100555_GQ438114	340	36170	187502	53906	198862	167622	48942	48942
refbc_100555_GQ438115	340	36170	187502	53906	193542	167622	48942	48942
refbc_100555_GQ438116	340	36170	187502	53906	198862	167622	48942	48942
refbc_100555_GQ438117	340	36170	187502	53906	198862	167622	48942	48942
refbc_100555_GQ438118	340	36170	187502	53906	198862	167622	48942	48942
refbc_100555_GQ438119	346	36170	187502	53906	193542	163138	48942	48942
refbc_100555_GQ438120	346	36170	187502	53906	198862	167622	48942	48942
refbc_100555_GQ438121	346	36170	187502	53906	198862	167622	48942	48942
refbc_100555_GQ438122	340	36170	187502	53906	198862	167622	48942	48942
refbc_100555_GQ438123	340	36170	187502	53906	198862	167622	48942	48942
refbc_100555_GQ438124	340	36170	187502	53906	198862	167622	48942	48942
refbc_100555_GQ438125	340	36170	187502	53906	193542	163138	48942	48942
refbc_100555_GQ438126	340	36170	187502	53906	198862	167622	48942	48942
refbc_100555_GQ438127	340	36170	187502	53906	193542	163138	48942	48942
refbc_100555_GQ438128	340	36170	187502	53906	198862	167622	48942	48942
refbc_100555_GQ438129	340	36170	187502	53906	193542	167622	48942	48942
refbc_100555_GQ438130	340	36170	187502	53906	193542	163138	48942	48942
refbc_100555_GQ438131	340	36170	187502	53906	193542	167622	48942	48942
refbc_100555_GQ438132	340	36170	187502	53906	198862	167622	48942	48942
refbc_100555_GQ438133	340	36170	187502	53906	198862	167622	48942	48942
refbc_100555_GQ438134	340	36170	187502	53906	198862	167622	48942	48942
refbc_100555_GQ438135	340	36170	187502	53906	198862	167622	48942	48942
refbc_100555_GQ438136	340	36170	187502	53906	193542	163138	48942	48942
refbc_100555_GQ438137	340	36170	187502	53906	198862	167622	48942	48942
refbc_100555_GQ438138	340	36170	187502	53906	193542	167622	48942	48942
refbc_100555_GQ438139	340	36170	187502	53906	198862	167622	48942	48942
refbc_100555_GQ438140	340	36170	187502	53906	198862	167622	48942	48942
refbc_100555_GQ438141	340	36170	187502	53906	193542	163138	48942	48942
refbc_100555_GQ438142	340	36170	187502	53906	198862	167622	48942	48942
refbc_100555_GQ438143	340	36170	187502	53906	198862	167622	48942	48942
refbc_100555_GQ438144	340	36170	187502	53906	193542	167622	48942	48942
refbc_100555_GQ438145	340	36170	187502	53906	198862	167622	48942	48942
refbc_100555_GQ438146	340	36170	187502	53906	193542	167622	48942	48942
refbc_100555_GQ438147	340	36170	187502	53906	198862	167622	48942	48942
refbc_100555_GQ438148	340	36170	187502	53906	198862	167622	48942	48942
refbc_100555_GQ438149	340	36170	187502	53906	198862	167622	48942	48942
refbc_100555_GQ438150	340	36170	187502	53906	193542	163138	48942	48942
refbc_100555_GQ438151	340	36170	187502	53906	198862	167622	48942	48942
refbc_100555_GQ438152	341	36170	187502	53906	198862	167622	48942	48942
refbc_100555_GQ438153	341	36170	187502	53906	198862	167622	48942	48942
refbc_100555_GQ438154	341	36170	187502	53906	198862	167622	48942	48942
refbc_100555_GQ438155	341	36170	187502	53906	193542	167622	48942	48942
refbc_100555_GQ438156	341	36170	187502	53906	198862	167622	48942	48942
refbc_100555_GQ438157	340	36170	187502	53906	193542	167622	48942	48942
refbc_100555_GQ438158	340	36170	187502	53906	198862	167622	48942	48942
refbc_100555_GQ438159	340	36170	187502	53906	193542	163138	48942	48942
refbc_100555_GQ438160	340	36170	187502	53906	193542	163138	48942	48942
refbc_100555_GQ438161	340	36170	187502	53906	198862	167622	48942	48942
refbc_100555_GQ438162	340	36170	187502	53906	198862	167622	48942	48942
refbc_100555_GQ438163	340	36170	187502	53906	198862	167622	48942	48942
refbc_100555_GQ438164	340	36170	187502	53906	193542	167622	48942	48942
refbc_100555_GQ438165	340	36170	187502	53906	198862	167622	48942	48942
refbc_100555_GQ438166	340	36170	187502	53906	193542	163138	48942	48942
refbc_100555_GQ438167	340	36170	187502	53906	198862	167622	48942	48942
refbc_100555_GQ438168	340	36170	187502	53906	198862	167622	48942	48942
refbc_100555_GQ438169	340	36170	187502	53906	193542	167622	48942	48942
refbc_100555_GQ438170	340	36170	187502	53906	198862	167622	48942	48942
refbc_100555_GQ438171	340	36170	187502	53906	198862	167622	48942	48942
refbc_100555_GQ438172	340	36170	187502	53906	193542	163138	48942	48942
refbc_100555_GQ438173	340	36170	187502	53906	198862	167622	48942	48942
refbc_100555_GQ438174	340	36170	187502	53906	198862	167622	48942	48942
refbc_100555_GQ438175	340	36170	187502	53906	198862	167622	48942	48942
refbc_100555_GQ438176	340	36170	187502	53906	193542	167622	48942	48942
refbc_100555_GQ438177	340	36170	187502	53906	198862	167622	48942	48942
refbc_100555_GQ438178	340	36170	187502	53906	193542	163138	48942	48942
refbc_100555_GQ438179	340	36170	187502	53906	198862	167622	48942	48942
refbc_100555_GQ438180	340	36170	187502	53906	198862	167622	48942	48942
refbc_100555_GQ438181	346	36170	187502	53906	193542	163138	48942	48942
refbc_100555_GQ438182	340	36170	187502	53906	198862	167622	48942	48942
refbc_100555_GQ438183	340	36170	187502	53906	198862	167622	48942	48942
refbc_100555_GQ438184	340	36170	187502	53906	193542	167622	48942	48942
refbc_100555_GQ438185	340	36170	187502	53906	198862	167622	48942	48942
refbc_100555_GQ438186	340	36170	187502	53906	193542	167622	48942	48942
refbc_100555_GQ438187	340	36170	187502	53906	198862	167622	48942	48942
refbc_100555_GQ438188	340	36170	187502	53906	193542	163138	48942	48942
refbc_100555_GQ438189	340	36170	187502	53906	198862	167622	48942	48942
refbc_100555_GQ438190	340	36170	187502	53906	198862	167622	48942	48942
refbc_100555_GQ438191	340	36170	187502	53906	193542	163138	48942	48942
refbc_100555_GQ438192	340	36170	187502	53906	198862	167622	48942	48942
refbc_100555_GQ438193	340	36170	187502	53906	193542	167622	48942	48942
refbc_100555_GQ438194	340	36170	187502	53906	198862	167622	48942	48942
refbc_100555_GQ438195	340	36170	187502	53906	193542	167622	48942	48942
refbc_100555_GQ438196	340	36170	187502	53906	198862	167622	48942	48942
refbc_100555_GQ438197	340	36170	187502	53906	198862	167622	48942	48942
refbc_100555_GQ438198	340	36170	187502	53906	193542	163138	48942	48942
refbc_100555_GQ438199	340	36170	187502	53906	198862	167622	48942	48942
refbc_100555_GQ438200	340	36170	187502	53906	198862	167622	48942	48942
refbc_100555_GQ438201	340	36170	187502	53906	198862	167622	48942	48942
refbc_100555_GQ438202	340	36170	187502	53906	193542	167622	48942	48942
refbc_100555_GQ438203	340	36170	187502	53906	193542	163138	48942	48942
refbc_100555_GQ438204	340	36170	187502	53906	198862	167622	48942	48942
refbc_100555_GQ438205	340	36170	187502	53906	198862	167622	48942	48942
refbc_100555_GQ438206	340	36170	187502	53906	193542	167622	48942	48942
refbc_100555_GQ438207	340	36170	187502	53906	198862	167622	48942	48942
refbc_100555_GQ438208	340	36170	187502	53906	193542	167622	48942	48942
refbc_100555_GQ438209	340	36170	187502	53906	198862	167622	48942	48942
refbc_100555_GQ438210	340	36170	187502	53906	198862	167622	48942	48942
refbc_100555_GQ438211	340	36170	187502	53906	193542	167622	48942	48942
refbc_100555_GQ982221	362	41174	187502	53906	201942	170218	48942	48942
refbc_100569_GU935097	401	41174	198862	53906	218742	184378	54746	54746
refbc_100569_GU935098	401	41174	198862	53906	218742	184378	54746	54746
refbc_100569_GU935099	382	41174	187502	53906	210342	177298	54746	54746
refbc_100569_GU935100	383	41174	187502	53906	210342	177298	54746	54746
refbc_100580_GU935116	404	41174	198862	53906	227142	191458	54746	54746
refbc_100580_GU935117	404	41174	198862	53906	227142	191458	54746	54746
refbc_101013_GQ476767	292	36170	178982	35490	184662	153422	41174	41174
refbc_101013_GQ476768	292	36170	178982	35490	171922	153422	41174	41174
refbc_101013_GQ476769	292	36170	178982	35490	184662	153422	41174	41174
refbc_101016_GQ476772	292	36170	178982	35490	184662	153422	41174	41174
refbc_101016_GQ476775	292	36170	178982	35490	184662	153422	41174	41174
refbc_101017_GQ476773	292	36170	178982	35490	164122	136358	41174	41174
refbc_101017_GQ476777	292	36170	178982	35490	184662	153422	41174	41174
refbc_101017_GQ476779	292	36170	178982	35490	184662	153422	41174	41174
refbc_101018_GQ476774	292	36170	178982	35490	171922	153422	41174	41174
refbc_101018_GQ476776	292	36170	178982	35490	184662	153422	41174	41174
refbc_101018_GQ476778	292	36170	178982	35490	164122	136358	41174	41174
refbc_101471_AB055560	380	41174	187502	53906	210342	177298	54746	54746
refbc_101471_AY009035	380	41174	187502	53906	210342	177298	54746	54746
refbc_101729_EF590704	287	31486	178982	35490	171922	153422	41174	41174
refbc_101729_EU359322	396	41174	198862	53906	218742	184378	54746	54746
refbc_101729_GQ248321	419	48942	198862	66394	227142	191458	54746	54746
refbc_101993_DQ006212	286	31486	170462	35490	184662	153422	41174	41174
refbc_101993_EF590728	372	41174	187502	53906	210342	177298	54746	54746
refbc_101993_EU750477	258	31486	170462	30846	167622	139222	36170	36170
refbc_101993_EU750478	258	31486	170462	30846	167622	139222	36170	36170
refbc_102761_DQ006150	421	48942	198862	66394	225362	195322	60870	60870
refbc_102761_EU337033	391	41174	198862	53906	218742	184378	54746	54746
refbc_102765_EU337026	375	41174	187502	53906	210342	177298	54746	54746
refbc_102765_EU750463	380	41174	187502	53906	210342	177298	54746	54746
refbc_102765_EU750464	380	41174	187502	53906	210342	177298	54746	54746
refbc_102777_EU750465	382	41174	187502	53906	210342	177298	54746	54746
refbc_102777_EU750466	382	41174	187502	53906	210342	177298	54746	54746
refbc_103762_GU177369	535	56426	218742	66394	272546	235542	77162	77162
refbc_103762_GU177370	535	56426	218742	66394	272546	235542	77162	77162
refbc_103762_GU177371	535	56426	218742	66394	272546	235542	77162	77162
refbc_103762_GU177372	535	56426	218742	66394	272546	235542	77162	77162
refbc_103762_GU177373	535	56426	218742	66394	272546	235542	77162	77162
refbc_103762_GU177374	535	56426	218742	66394	272546	235542	77162	77162
refbc_103762_GU177375	535	56426	218742	66394	272546	235542	77162	77162
refbc_103762_GU177383	535	56426	218742	66394	272546	235542	77162	77162
refbc_103762_GU177384	535	56426	218742	66394	272546	235542	77162	77162
refbc_103762_GU177385	535	56426	218742	66394	272546	235542	77162	77162
refbc_103762_GU177389	535	56426	218742	66394	272546	235542	77162	77162
refbc_106677_EU750522	358	41174	187502	53906	201942	170218	48942	48942
refbc_106677_EU750523	358	41174	187502	53906	201942	170218	48942	48942
refbc_107817_EF537208	506	56426	207382	66394	261362	226522	67314	67314
refbc_107817_EF537209	507	56426	207382	66394	261362	226522	67314	67314
refbc_107817_EF537210	507	56426	207382	66394	261362	226522	67314	67314
refbc_108434_FJ039008	500	56426	207382	66394	261362	226522	67314	67314
refbc_108434_GQ428773	536	56426	218742	66394	272546	235542	77162	77162
refbc_108536_EF419592	477	48942	207382	66394	252362	218722	60870	60870
refbc_108536_EF419593	468	48942	207382	66394	243362	210922	60870	60870
refbc_108536_EF419594	469	48942	207382	66394	243362	210922	60870	60870
refbc_108536_EF419595	470	48942	207382	66394	243362	210922	60870	60870
refbc_108536_EF419596	469	48942	207382	66394	243362	210922	60870	60870
refbc_109058_FJ844542	389	41174	187502	53906	218742	184378	54746	54746
refbc_109058_FJ844543	389	41174	187502	53906	218742	184378	54746	54746
refbc_109058_FJ844544	389	41174	187502	53906	218742	184378	54746	54746
refbc_109059_FJ844493	385	41174	187502	53906	218742	184378	54746	54746
refbc_109059_FJ844494	385	41174	187502	53906	218742	184378	54746	54746
refbc_109059_FJ844495	385	41174	187502	53906	218742	184378	54746	54746
refbc_109059_FJ844496	385	41174	187502	53906	218742	184378	54746	54746
refbc_109059_FJ844497	385	41174	187502	53906	218742	184378	54746	54746
refbc_109060_FJ844545	416	48942	198862	53906	227142	191458	54746	54746
refbc_109060_FJ844546	416	48942	198862	53906	227142	191458	54746	54746
refbc_109061_FJ011869	448	48942	198862	66394	234362	203122	60870	60870
refbc_109061_FJ844520	416	48942	198862	53906	227142	191458	54746	54746
refbc_109061_FJ844521	416	48942	198862	53906	227142	191458	54746	54746
refbc_109061_FJ844523	416	48942	198862	53906	227142	191458	54746	54746
refbc_109061_FJ844524	416	48942	198862	53906	227142	191458	54746	54746
refbc_109061_FJ844525	384	41174	187502	53906	210342	177298	54746	54746
refbc_109061_FJ844526	384	41174	187502	53906	210342	177298	54746	54746
refbc_109061_FJ844527	384	41174	187502	53906	210342	177298	54746	54746
refbc_109061_FJ844528	408	41174	198862	53906	227142	191458	54746	54746
refbc_109061_FJ844529	408	41174	198862	53906	227142	191458	54746	54746
refbc_109061_FJ844531	408	41174	198862	53906	227142	191458	54746	54746
refbc_109063_AY211458	450	48942	207382	66394	234362	203122	60870	60870
refbc_109063_FJ844522	416	48942	198862	53906	227142	191458	54746	54746
refbc_109063_FJ844555	388	41174	187502	53906	218742	184378	54746	54746
refbc_109063_FJ844556	388	41174	187502	53906	218742	184378	54746	54746
refbc_109063_FJ844557	388	41174	187502	53906	218742	184378	54746	54746
refbc_109063_FJ844558	388	41174	187502	53906	218742	184378	54746	54746
refbc_109063_FJ844559	388	41174	187502	53906	218742	184378	54746	54746
refbc_109063_FJ844560	388	41174	187502	53906	218742	184378	54746	54746
refbc_109065_FJ844518	416	48942	198862	53906	227142	191458	54746	54746
refbc_109065_FJ844519	416	48942	198862	53906	227142	191458	54746	54746
refbc_109066_FJ011871	430	48942	198862	66394	225362	195322	60870	60870
refbc_109066_FJ011872	430	48942	198862	66394	225362	195322	60870	60870
refbc_109066_FJ844511	398	41174	198862	53906	218742	184378	54746	54746
refbc_109066_FJ844512	398	41174	198862	53906	218742	184378	54746	54746
refbc_109066_FJ844513	398	41174	198862	53906	218742	184378	54746	54746
refbc_109066_FJ844514	398	41174	198862	53906	218742	184378	54746	54746
refbc_109066_FJ844515	398	41174	198862	53906	218742	184378	54746	54746
refbc_109067_FJ844489	336	36170	178982	53906	198862	167622	48942	48942
refbc_109067_FJ844490	336	36170	178982	53906	198862	167622	48942	48942
refbc_109067_FJ844491	336	36170	178982	53906	193542	163138	48942	48942
refbc_109067_FJ844492	336	36170	178982	53906	198862	167622	48942	48942
refbc_109069_FJ844562	380	41174	187502	53906	210342	177298	54746	54746
refbc_109069_FJ844563	358	41174	187502	53906	201942	170218	48942	48942
refbc_109070_FJ844564	378	41174	187502	53906	210342	177298	54746	54746
refbc_109070_FJ844565	411	41174	198862	53906	227142	191458	54746	54746
refbc_109071_FJ844485	291	36170	178982	35490	171922	153422	41174	41174
refbc_109071_FJ844486	291	36170	178982	35490	184662	153422	41174	41174
refbc_109072_FJ844540	362	41174	187502	53906	201942	170218	48942	48942
refbc_109072_FJ844541	388	41174	187502	53906	218742	184378	54746	54746
refbc_109470_FJ844508	402	41174	198862	53906	218742	184378	54746	54746
refbc_109470_FJ844509	402	41174	198862	53906	218742	184378	54746	54746
refbc_109470_FJ844510	402	41174	198862	53906	218742	184378	54746	54746
refbc_109996_EF590736	244	31486	170462	30846	167622	139222	36170	36170
refbc_109996_GQ248383	317	36170	178982	53906	184662	153422	48942	48942
refbc_111144_AY082192	296	36170	178982	35490	171922	153422	41174	41174
refbc_111144_AY082202	280	31486	170462	35490	184662	153422	41174	41174
refbc_111568_AB055555	385	41174	187502	53906	218742	184378	54746	54746
refbc_111568_AY009033	385	41174	187502	53906	218742	184378	54746	54746
refbc_111569_AB055562	380	41174	187502	53906	210342	177298	54746	54746
refbc_111569_AY009034	380	41174	187502	53906	210342	177298	54746	54746
refbc_112589_AF216560	242	31486	170462	30846	167622	139222	36170	36170
refbc_112589_AF216561	241	31486	170462	30846	156058	139222	36170	36170
refbc_112589_AF216562	239	31486	159102	30846	167622	139222	36170	36170
refbc_112589_AF216563	241	31486	170462	30846	167622	139222	36170	36170
refbc_112589_AF216564	241	31486	170462	30846	167622	139222	36170	36170
refbc_112589_AF216565	241	31486	170462	30846	141898	117858	36170	36170
refbc_112589_AF216566	237	31486	159102	30846	141898	117858	36170	36170
refbc_112589_AF216568	245	31486	170462	30846	141898	117858	36170	36170
refbc_112589_AF216569	241	31486	170462	30846	167622	139222	36170	36170
refbc_112589_AF216571	241	31486	170462	30846	167622	139222	36170	36170
refbc_112589_AF216573	240	31486	159102	30846	141898	117858	36170	36170
refbc_112589_AF216574	239	31486	159102	30846	141898	117858	36170	36170
refbc_112590_AF216558	239	31486	159102	30846	141898	117858	36170	36170
refbc_112590_AF216577	237	31486	159102	30846	156058	139222	36170	36170
refbc_112593_AF216575	243	31486	170462	30846	167622	139222	36170	36170
refbc_112593_AF216576	238	31486	159102	30846	167622	139222	36170	36170
refbc_112861_EU742440	432	48942	198862	66394	225362	195322	60870	60870
refbc_112861_FJ189606	417	48942	198862	53906	227142	191458	54746	54746
refbc_113210_EF537221	506	56426	207382	66394	261362	226522	67314	67314
refbc_113210_EF537222	506	56426	207382	66394	261362	226522	67314	67314
refbc_113210_EF537223	506	56426	207382	66394	261362	226522	67314	67314
refbc_114617_GQ435429	555	65474	218742	83366	282266	243942	77162	77162
refbc_114617_GQ435430	555	65474	218742	83366	282266	243942	77162	77162
refbc_114937_AY500615	272	31486	170462	35490	184662	153422	41174	41174
refbc_114937_FJ395549	360	41174	187502	53906	201942	170218	48942	48942
refbc_114937_FN687520	276	31486	170462	35490	171922	153422	41174	41174
refbc_115636_FJ038928	494	56426	207382	66394	252362	218722	67314	67314
refbc_115636_GQ428688	491	56426	207382	66394	252362	218722	67314	67314
refbc_115636_GQ428766	491	56426	207382	66394	252362	218722	67314	67314
refbc_117260_DQ778741	352	41174	187502	53906	201942	170218	48942	48942
refbc_117260_DQ778742	320	36170	178982	53906	198862	167622	48942	48942
refbc_117260_DQ778743	308	36170	178982	53906	184662	153422	41174	41174
refbc_119176_GQ435106	372	41174	187502	53906	210342	177298	54746	54746
refbc_119176_GQ435107	389	41174	187502	53906	218742	184378	54746	54746
refbc_119951_AM489828	467	48942	207382	66394	243362	210922	60870	60870
refbc_119951_GU135338	548	56426	218742	66394	272546	235542	77162	77162
refbc_120273_GQ435019	520	56426	218742	66394	270362	234322	67314	67314
refbc_120290_GQ434986	467	48942	207382	66394	243362	210922	60870	60870
refbc_120290_GU135421	544	56426	218742	66394	272546	235542	77162	77162
refbc_121081_GQ131060	386	41174	187502	53906	218742	184378	54746	54746
refbc_121081_GQ131067	388	41174	187502	53906	218742	184378	54746	54746
refbc_121082_AF261994	451	48942	207382	66394	234362	203122	60870	60870
refbc_121082_GQ131075	393	41174	198862	53906	218742	184378	54746	54746
refbc_121082_GQ131076	392	41174	198862	53906	218742	184378	54746	54746
refbc_121082_GQ258841	393	41174	198862	53906	218742	184378	54746	54746
refbc_121082_GQ258842	392	41174	198862	53906	218742	184378	54746	54746
refbc_121082_GQ258843	392	41174	198862	53906	218742	184378	54746	54746
refbc_121174_DQ846180	379	41174	187502	53906	210342	177298	54746	54746
refbc_121174_DQ846181	379	41174	187502	53906	210342	177298	54746	54746
refbc_121174_DQ846182	379	41174	187502	53906	210342	177298	54746	54746
refbc_121174_DQ846195	379	41174	187502	53906	210342	177298	54746	54746
refbc_121174_DQ846196	379	41174	187502	53906	210342	177298	54746	54746
refbc_121174_DQ846197	379	41174	187502	53906	210342	177298	54746	54746
refbc_121174_DQ846198	379	41174	187502	53906	210342	177298	54746	54746
refbc_121174_DQ846199	379	41174	187502	53906	210342	177298	54746	54746
refbc_121174_DQ846200	379	41174	187502	53906	210342	177298	54746	54746
refbc_121174_DQ846201	379	41174	187502	53906	210342	177298	54746	54746
refbc_121174_DQ846202	379	41174	187502	53906	210342	177298	54746	54746
refbc_121174_DQ846203	379	41174	187502	53906	210342	177298	54746	54746
refbc_121174_DQ846231	379	41174	187502	53906	210342	177298	54746	54746
refbc_121174_DQ846232	379	41174	187502	53906	210342	177298	54746	54746
refbc_121174_DQ846233	379	41174	187502	53906	210342	177298	54746	54746
refbc_121174_DQ846234	379	41174	187502	53906	210342	177298	54746	54746
refbc_121174_DQ846235	379	41174	187502	53906	210342	177298	54746	54746
refbc_121174_DQ846236	379	41174	187502	53906	210342	177298	54746	54746
refbc_121288_GQ131056	367	41174	187502	53906	210342	177298	54746	54746
refbc_121288_GQ131057	379	41174	187502	53906	210342	177298	54746	54746
refbc_121780_EU204723	525	56426	218742	66394	270362	234322	67314	67314
refbc_121780_EU204724	525	56426	218742	66394	270362	234322	67314	67314
refbc_122552_GU046621	294	36170	178982	35490	171922	153422	41174	41174
refbc_122552_GU046622	294	36170	178982	35490	184662	153422	41174	41174
refbc_122625_AY507477	228	27122	159102	30846	167622	139222	36170	36170
refbc_123388_GQ428749	552	56426	218742	83366	282266	243942	77162	77162
refbc_123388_GQ428750	555	65474	218742	83366	282266	243942	77162	77162
refbc_123564_DQ008890	386	41174	187502	53906	218742	184378	54746	54746
refbc_123564_DQ008891	389	41174	187502	53906	218742	184378	54746	54746
refbc_123564_DQ008897	365	41174	187502	53906	201942	170218	48942	48942
refbc_123564_EU814678	370	41174	187502	53906	210342	177298	54746	54746
refbc_123564_FJ874983	299	36170	178982	35490	171922	153422	41174	41174
refbc_123564_FJ874984	300	36170	178982	35490	184662	153422	41174	41174
refbc_123564_FJ874985	288	31486	178982	35490	184662	153422	41174	41174
refbc_123564_GQ435343	381	41174	187502	53906	210342	177298	54746	54746
refbc_123564_GQ435344	370	41174	187502	53906	210342	177298	54746	54746
refbc_123564_GQ435345	381	41174	187502	53906	210342	177298	54746	54746
refbc_123676_EU515270	331	36170	178982	53906	193542	167622	48942	48942
refbc_123676_EU515271	331	36170	178982	53906	198862	167622	48942	48942
refbc_123676_EU515272	331	36170	178982	53906	193542	167622	48942	48942
refbc_123676_EU515273	325	36170	178982	53906	198862	167622	48942	48942
refbc_123676_EU515274	325	36170	178982	53906	198862	167622	48942	48942
refbc_123676_EU515275	326	36170	178982	53906	185142	156058	48942	48942
refbc_123676_EU515276	325	36170	178982	53906	198862	167622	48942	48942
refbc_123676_EU515277	325	36170	178982	53906	185142	156058	48942	48942
refbc_123676_EU515278	325	36170	178982	53906	185142	167622	48942	48942
refbc_123676_EU515279	325	36170	178982	53906	198862	167622	48942	48942
refbc_123676_EU515280	340	36170	187502	53906	193542	167622	48942	48942
refbc_123676_EU515281	325	36170	178982	53906	198862	167622	48942	48942
refbc_123676_EU515282	340	36170	187502	53906	198862	167622	48942	48942
refbc_123676_EU515283	325	36170	178982	53906	198862	167622	48942	48942
refbc_123676_EU515284	325	36170	178982	53906	198862	167622	48942	48942
refbc_123676_EU515285	325	36170	178982	53906	198862	167622	48942	48942
refbc_123676_EU515286	348	41174	187502	53906	193542	163138	48942	48942
refbc_123676_FJ647133	372	41174	187502	53906	210342	177298	54746	54746
refbc_123676_FJ647134	372	41174	187502	53906	210342	177298	54746	54746
refbc_123676_FJ647135	405	41174	198862	53906	227142	191458	54746	54746
refbc_123676_FJ647136	372	41174	187502	53906	210342	177298	54746	54746
refbc_123676_FJ647137	372	41174	187502	53906	210342	177298	54746	54746
refbc_124263_FJ848128	286	31486	170462	35490	184662	153422	41174	41174
refbc_124263_FJ848130	284	31486	170462	35490	156322	129878	41174	41174
refbc_124765_DQ006132	226	27122	159102	30846	156058	139222	36170	36170
refbc_124765_DQ006133	226	27122	159102	30846	167622	139222	36170	36170
refbc_124765_GQ248243	282	31486	170462	35490	184662	153422	41174	41174
refbc_124931_DQ846189	379	41174	187502	53906	210342	177298	54746	54746
refbc_124931_DQ846190	379	41174	187502	53906	210342	177298	54746	54746
refbc_124931_DQ846191	379	41174	187502	53906	210342	177298	54746	54746
refbc_125138_FJ563978	595	65474	227262	83366	301706	260742	77162	77162
refbc_125680_EF187694	493	56426	207382	66394	252362	218722	67314	67314
refbc_125680_EF187708	509	56426	207382	66394	261362	226522	67314	67314
refbc_126270_FJ395529	179	21434	150582	24758	142838	122182	31486	31486
refbc_126418_FJ527907	509	56426	207382	66394	261362	226522	67314	67314
refbc_126418_GQ435222	450	48942	207382	66394	234362	203122	60870	60870
refbc_126435_GQ429115	388	41174	187502	53906	218742	184378	54746	54746
refbc_126435_GU135307	386	41174	187502	53906	218742	184378	54746	54746
refbc_126561_EU854417	460	48942	207382	66394	243362	210922	60870	60870
refbc_126561_EU854418	460	48942	207382	66394	243362	210922	60870	60870
refbc_126561_GU120324	451	48942	207382	66394	234362	203122	60870	60870
refbc_127553_AB107667	429	48942	198862	66394	225362	195322	60870	60870
refbc_127553_AB107668	429	48942	198862	66394	225362	195322	60870	60870
refbc_127553_AB107669	429	48942	198862	66394	225362	195322	60870	60870
refbc_127553_AB107670	429	48942	198862	66394	225362	195322	60870	60870
refbc_127553_AB107671	429	48942	198862	66394	225362	195322	60870	60870
refbc_127553_AB107672	429	48942	198862	66394	225362	195322	60870	60870
refbc_127553_AB107673	429	48942	198862	66394	225362	195322	60870	60870
refbc_127553_AB107674	429	48942	198862	66394	225362	195322	60870	60870
refbc_127553_AB107675	428	48942	198862	66394	225362	195322	60870	60870
refbc_127553_AB107676	430	48942	198862	66394	225362	195322	60870	60870
refbc_127553_AB107677	429	48942	198862	66394	225362	195322	60870	60870
refbc_127553_AB107678	429	48942	198862	66394	225362	195322	60870	60870
refbc_127553_AB107679	430	48942	198862	66394	225362	195322	60870	60870
refbc_127553_AB107680	428	48942	198862	66394	225362	195322	60870	60870
refbc_127553_AB107681	429	48942	198862	66394	225362	195322	60870	60870
refbc_127553_AB107682	430	48942	198862	66394	225362	195322	60870	60870
refbc_127553_AB107683	429	48942	198862	66394	225362	195322	60870	60870
refbc_127553_AB107684	429	48942	198862	66394	225362	195322	60870	60870
refbc_127553_AB107685	456	48942	207382	66394	243362	210922	60870	60870
refbc_127553_AB107686	456	48942	207382	66394	243362	210922	60870	60870
refbc_127621_GQ248399	398	41174	198862	53906	218742	184378	54746	54746
refbc_127621_GQ248400	365	41174	187502	53906	201942	170218	48942	48942
refbc_128230_AY309617	186	21434	150582	24758	167622	139222	31486	31486
refbc_128230_GQ428034	186	21434	150582	24758	167622	139222	31486	31486
refbc_128237_AY309607	182	21434	150582	24758	123398	98274	31486	31486
refbc_128237_AY309619	182	21434	150582	24758	153422	122182	31486	31486
refbc_128292_FJ039036	361	41174	187502	53906	201942	170218	48942	48942
refbc_128292_FJ039037	361	41174	187502	53906	201942	170218	48942	48942
refbc_128292_GQ428648	362	41174	187502	53906	201942	170218	48942	48942
refbc_128292_GQ428649	378	41174	187502	53906	210342	177298	54746	54746
refbc_128595_GQ428738	398	41174	198862	53906	218742	184378	54746	54746
refbc_128595_GQ428739	403	41174	198862	53906	227142	191458	54746	54746
refbc_128647_EU153966	288	31486	178982	35490	184662	153422	41174	41174
refbc_128647_EU153967	287	31486	178982	35490	184662	153422	41174	41174
refbc_128650_EU153972	407	41174	198862	53906	227142	191458	54746	54746
refbc_128650_EU153973	422	48942	198862	66394	225362	195322	60870	60870
refbc_128650_EU153974	423	48942	198862	66394	225362	195322	60870	60870
refbc_128661_AF268761	464	48942	207382	66394	243362	210922	60870	60870
refbc_128661_EU153983	423	48942	198862	66394	225362	195322	60870	60870
refbc_128682_AF268795	469	48942	207382	66394	243362	210922	60870	60870
refbc_128682_EU153990	423	48942	198862	66394	225362	195322	60870	60870
refbc_128701_EF491217	438	48942	198862	66394	234362	203122	60870	60870
refbc_128701_EF491218	438	48942	198862	66394	234362	203122	60870	60870
refbc_128701_EF491219	438	48942	198862	66394	234362	203122	60870	60870
refbc_128701_EF491220	438	48942	198862	66394	234362	203122	60870	60870
refbc_128702_AF268805	469	48942	207382	66394	243362	210922	60870	60870
refbc_128702_FJ038961	498	56426	207382	66394	261362	226522	67314	67314
refbc_128702_FJ038962	498	56426	207382	66394	261362	226522	67314	67314
refbc_128702_GQ428740	369	41174	187502	53906	210342	177298	54746	54746
refbc_128702_GQ428741	513	56426	218742	66394	261362	226522	67314	67314
refbc_128738_GQ435124	364	41174	187502	53906	201942	170218	48942	48942
refbc_128738_GQ435125	364	41174	187502	53906	201942	170218	48942	48942
refbc_129213_EF590731	197	27122	150582	24758	156058	139222	31486	31486
refbc_129213_EU750673	186	21434	150582	24758	167622	139222	31486	31486
refbc_129213_EU750674	186	21434	150582	24758	134818	111978	31486	31486
refbc_129213_EU750675	184	21434	150582	24758	167622	139222	31486	31486
refbc_129213_FJ572554	178	21434	150582	24758	153422	122182	27122	27122
refbc_129213_FJ572555	177	21434	150582	24758	123398	98274	27122	27122
refbc_129213_GQ248374	264	31486	170462	35490	184662	153422	41174	41174
refbc_12953_AY841430	477	48942	207382	66394	252362	218722	60870	60870
refbc_12953_GQ139851	360	41174	187502	53906	201942	170218	48942	48942
refbc_12953_GQ139861	367	41174	187502	53906	210342	177298	54746	54746
refbc_12990_AY211429	410	41174	198862	53906	227142	191458	54746	54746
refbc_12990_FJ011833	407	41174	198862	53906	227142	191458	54746	54746
refbc_12990_FJ395523	231	27122	159102	30846	167622	139222	36170	36170
refbc_12991_AY211430	409	41174	198862	53906	227142	191458	54746	54746
refbc_12991_DQ006158	226	27122	159102	30846	156058	139222	36170	36170
refbc_13216_EF590727	219	27122	159102	30846	134818	111978	31486	31486
refbc_13216_GQ435023	195	27122	150582	24758	167622	139222	31486	31486
refbc_13216_GQ891994	227	27122	159102	30846	167622	139222	36170	36170
refbc_133204_AY500634	290	36170	178982	35490	184662	153422	41174	41174
refbc_133204_EF590734	277	31486	170462	35490	184662	153422	41174	41174
refbc_133204_GQ248381	325	36170	178982	53906	198862	167622	48942	48942
refbc_133204_GU562409	291	36170	178982	35490	184662	153422	41174	41174
refbc_13329_DQ131877	378	41174	187502	53906	210342	177298	54746	54746
refbc_13329_FJ395492	507	56426	207382	66394	261362	226522	67314	67314
refbc_133442_EF590740	448	48942	198862	66394	234362	203122	60870	60870
refbc_133442_GQ248389	483	56426	207382	66394	252362	218722	60870	60870
refbc_13345_GU135312	523	56426	218742	66394	270362	234322	67314	67314
refbc_13345_GU135441	513	56426	218742	66394	261362	226522	67314	67314
refbc_13359_DQ131853	379	41174	187502	53906	210342	177298	54746	54746
refbc_13359_EF538023	381	41174	187502	53906	210342	177298	54746	54746
refbc_13393_AY578302	272	31486	170462	35490	184662	153422	41174	41174
refbc_13393_AY841431	429	48942	198862	66394	225362	195322	60870	60870
refbc_13419_AF129047	153	21434	139222	20914	153422	122182	21434	21434
refbc_13419_GQ435155	287	31486	178982	35490	184662	153422	41174	41174
refbc_13429_AF129048	153	21434	139222	20914	123398	98274	21434	21434
refbc_13429_EU153948	434	48942	198862	66394	225362	195322	60870	60870
refbc_13429_GQ435461	393	41174	198862	53906	218742	184378	54746	54746
refbc_13429_GU135428	428	48942	198862	66394	225362	195322	60870	60870
refbc_13451_FJ011848	442	48942	198862	66394	234362	203122	60870	60870
refbc_13451_FN687522	393	41174	198862	53906	218742	184378	54746	54746
refbc_13452_AY211450	423	48942	198862	66394	225362	195322	60870	60870
refbc_13452_FJ011850	421	48942	198862	66394	225362	195322	60870	60870
refbc_135789_EF564429	270	31486	170462	35490	184662	153422	41174	41174
refbc_135789_EF564430	272	31486	170462	35490	171922	153422	41174	41174
refbc_135789_EF564431	270	31486	170462	35490	184662	153422	41174	41174
refbc_13597_FJ395550	420	48942	198862	66394	227142	191458	60870	60870
refbc_13597_FJ493288	422	48942	198862	66394	225362	195322	60870	60870
refbc_13597_GU120319	431	48942	198862	66394	225362	195322	60870	60870
refbc_13614_AM887665	511	56426	218742	66394	261362	226522	67314	67314
refbc_13614_AM887666	511	56426	218742	66394	261362	226522	67314	67314
refbc_13614_FM205067	511	56426	218742	66394	261362	226522	67314	67314
refbc_13614_FM205068	511	56426	218742	66394	261362	226522	67314	67314
refbc_13614_FM205069	511	56426	218742	66394	261362	226522	67314	67314
refbc_13614_FM205070	511	56426	218742	66394	261362	226522	67314	67314
refbc_13614_FM205071	511	56426	218742	66394	261362	226522	67314	67314
refbc_13614_FM205072	511	56426	218742	66394	261362	226522	67314	67314
refbc_13614_FM205073	511	56426	218742	66394	261362	226522	67314	67314
refbc_13614_FM205074	511	56426	218742	66394	261362	226522	67314	67314
refbc_13614_FM205075	511	56426	218742	66394	261362	226522	67314	67314
refbc_13614_FM205076	511	56426	218742	66394	261362	226522	67314	67314
refbc_13614_FM205077	511	56426	218742	66394	261362	226522	67314	67314
refbc_13614_FM205078	511	56426	218742	66394	261362	226522	67314	67314
refbc_13614_FM205079	511	56426	218742	66394	261362	226522	67314	67314
refbc_13614_FM205080	511	56426	218742	66394	261362	226522	67314	67314
refbc_13614_FM205081	511	56426	218742	66394	261362	226522	67314	67314
refbc_13614_FM205082	511	56426	218742	66394	261362	226522	67314	67314
refbc_13614_FM205083	511	56426	218742	66394	261362	226522	67314	67314
refbc_13614_FM205084	511	56426	218742	66394	261362	226522	67314	67314
refbc_13614_FM205085	511	56426	218742	66394	261362	226522	67314	67314
refbc_13614_FM205086	511	56426	218742	66394	261362	226522	67314	67314
refbc_13614_FM205087	511	56426	218742	66394	261362	226522	67314	67314
refbc_13614_FM205088	511	56426	218742	66394	261362	226522	67314	67314
refbc_13614_FM205089	511	56426	218742	66394	261362	226522	67314	67314
refbc_13614_FM205090	511	56426	218742	66394	261362	226522	67314	67314
refbc_13614_FM205091	511	56426	218742	66394	261362	226522	67314	67314
refbc_13614_FM205092	511	56426	218742	66394	261362	226522	67314	67314
refbc_13614_FM205093	511	56426	218742	66394	261362	226522	67314	67314
refbc_13614_FM205094	511	56426	218742	66394	261362	226522	67314	67314
refbc_13614_FM205095	511	56426	218742	66394	261362	226522	67314	67314
refbc_13614_FM205096	511	56426	218742	66394	261362	226522	67314	67314
refbc_13614_FM205097	511	56426	218742	66394	261362	226522	67314	67314
refbc_13614_FM205098	511	56426	218742	66394	261362	226522	67314	67314
refbc_13614_FM205099	511	56426	218742	66394	261362	226522	67314	67314
refbc_13614_FM205100	511	56426	218742	66394	261362	226522	67314	67314
refbc_13614_FM205101	511	56426	218742	66394	261362	226522	67314	67314
refbc_13614_FM205102	511	56426	218742	66394	261362	226522	67314	67314
refbc_13614_FM205103	511	56426	218742	66394	261362	226522	67314	67314
refbc_13614_FM205104	511	56426	218742	66394	261362	226522	67314	67314
refbc_13614_FM205105	511	56426	218742	66394	261362	226522	67314	67314
refbc_13614_FM205106	511	56426	218742	66394	261362	226522	67314	67314
refbc_13614_FM205107	511	56426	218742	66394	261362	226522	67314	67314
refbc_13614_FM205108	511	56426	218742	66394	261362	226522	67314	67314
refbc_13614_FM205109	511	56426	218742	66394	261362	226522	67314	67314
refbc_13614_FM205110	511	56426	218742	66394	261362	226522	67314	67314
refbc_13614_FM205111	511	56426	218742	66394	261362	226522	67314	67314
refbc_13614_FM205112	511	56426	218742	66394	261362	226522	67314	67314
refbc_136209_EU552527	243	31486	170462	30846	167622	139222	36170	36170
refbc_13622_AY211456	431	48942	198862	66394	225362	195322	60870	60870
refbc_13622_FJ011865	429	48942	198862	66394	225362	195322	60870	60870
refbc_136670_GQ428646	333	36170	178982	53906	193542	163138	48942	48942
refbc_136670_GQ428647	335	36170	178982	53906	198862	167622	48942	48942
refbc_136983_EU213866	252	31486	170462	30846	148978	123738	36170	36170
refbc_136983_EU213867	252	31486	170462	30846	167622	139222	36170	36170
refbc_136983_EU213868	252	31486	170462	30846	156058	139222	36170	36170
refbc_136998_DQ778748	336	36170	178982	53906	198862	167622	48942	48942
refbc_136998_FJ395545	295	36170	178982	35490	171922	153422	41174	41174
refbc_137178_GU592486	232	27122	159102	30846	167622	139222	36170	36170
refbc_137178_GU592487	232	27122	159102	30846	167622	139222	36170	36170
refbc_137220_EU554041	459	48942	207382	66394	243362	210922	60870	60870
refbc_137220_GQ435476	421	48942	198862	66394	225362	195322	60870	60870
refbc_137220_GQ435477	421	48942	198862	66394	225362	195322	60870	60870
refbc_137220_GQ435478	421	48942	198862	66394	225362	195322	60870	60870
refbc_137221_EU554042	452	48942	207382	66394	234362	203122	60870	60870
refbc_137221_GQ435479	414	48942	198862	53906	227142	191458	54746	54746
refbc_137226_EU554043	459	48942	207382	66394	243362	210922	60870	60870
refbc_137226_GQ435480	421	48942	198862	66394	225362	195322	60870	60870
refbc_137226_GQ435481	421	48942	198862	66394	225362	195322	60870	60870
refbc_137226_GQ435482	421	48942	198862	66394	225362	195322	60870	60870
refbc_13731_EF374277	406	41174	198862	53906	227142	191458	54746	54746
refbc_13731_EF374278	378	41174	187502	53906	210342	177298	54746	54746
refbc_13731_EF374279	436	48942	198862	66394	234362	203122	60870	60870
refbc_13731_EF374280	436	48942	198862	66394	234362	203122	60870	60870
refbc_13731_GQ435123	374	41174	187502	53906	210342	177298	54746	54746
refbc_137457_EU937565	294	36170	178982	35490	184662	153422	41174	41174
refbc_137457_GQ435245	306	36170	178982	53906	184662	153422	41174	41174
refbc_137457_GQ435246	300	36170	178982	35490	164122	136358	41174	41174
refbc_137457_GQ435247	300	36170	178982	35490	184662	153422	41174	41174
refbc_137664_GQ139843	358	41174	187502	53906	201942	170218	48942	48942
refbc_137664_GQ139871	358	41174	187502	53906	201942	170218	48942	48942
refbc_137685_DQ006216	291	36170	178982	35490	184662	153422	41174	41174
refbc_137685_EF653752	264	31486	170462	35490	148522	123398	41174	41174
refbc_137685_EU196996	262	31486	170462	35490	184662	153422	36170	36170
refbc_137688_EF653757	367	41174	187502	53906	210342	177298	54746	54746
refbc_137688_EU196998	367	41174	187502	53906	210342	177298	54746	54746
refbc_137693_EF653735	338	36170	187502	53906	198862	167622	48942	48942
refbc_137693_EU750484	336	36170	178982	53906	193542	163138	48942	48942
refbc_137693_EU750485	335	36170	178982	53906	198862	167622	48942	48942
refbc_137693_EU750486	336	36170	178982	53906	198862	167622	48942	48942
refbc_137693_EU750487	340	36170	187502	53906	193542	167622	48942	48942
refbc_137693_FJ395458	437	48942	198862	66394	234362	203122	60870	60870
refbc_137693_FJ503034	336	36170	178982	53906	193542	163138	48942	48942
refbc_138017_GQ434968	395	41174	198862	53906	218742	184378	54746	54746
refbc_138017_GQ434969	395	41174	198862	53906	218742	184378	54746	54746
refbc_138017_GQ434970	395	41174	198862	53906	218742	184378	54746	54746
refbc_138020_AF524989	428	48942	198862	66394	225362	195322	60870	60870
refbc_138020_EU811987	382	41174	187502	53906	210342	177298	54746	54746
refbc_138028_AF195712	298	36170	178982	35490	171922	153422	41174	41174
refbc_138028_FJ808525	297	36170	178982	35490	171922	153422	41174	41174
refbc_138028_FJ808526	256	31486	170462	30846	167622	139222	36170	36170
refbc_138028_FJ808527	258	31486	170462	30846	167622	139222	36170	36170
refbc_138028_FJ808528	256	31486	170462	30846	167622	139222	36170	36170
refbc_138028_FJ808529	298	36170	178982	35490	164122	136358	41174	41174
refbc_138028_FJ808530	263	31486	170462	35490	184662	153422	41174	41174
refbc_138028_FJ808531	302	36170	178982	35490	164122	136358	41174	41174
refbc_138028_FJ808532	257	31486	170462	30846	167622	139222	36170	36170
refbc_138028_FJ808533	301	36170	178982	35490	164122	136358	41174	41174
refbc_138028_FJ808534	297	36170	178982	35490	184662	153422	41174	41174
refbc_138033_AF524993	412	48942	198862	53906	227142	191458	54746	54746
refbc_138033_FJ808555	412	48942	198862	53906	227142	191458	54746	54746
refbc_138033_FJ808556	407	41174	198862	53906	227142	191458	54746	54746
refbc_138033_FJ808557	412	48942	198862	53906	227142	191458	54746	54746
refbc_138033_FJ808558	442	48942	198862	66394	234362	203122	60870	60870
refbc_138033_FJ808559	411	41174	198862	53906	227142	191458	54746	54746
refbc_138033_FJ808560	404	41174	198862	53906	227142	191458	54746	54746
refbc_138033_FJ808561	409	41174	198862	53906	227142	191458	54746	54746
refbc_138033_FJ808562	412	48942	198862	53906	227142	191458	54746	54746
refbc_138033_FJ808563	411	41174	198862	53906	227142	191458	54746	54746
refbc_138033_FJ808564	398	41174	198862	53906	218742	184378	54746	54746
refbc_138033_FJ808565	412	48942	198862	53906	227142	191458	54746	54746
refbc_138033_FJ808566	411	41174	198862	53906	227142	191458	54746	54746
refbc_138043_AF195718	406	41174	198862	53906	227142	191458	54746	54746
refbc_138043_AF524996	409	41174	198862	53906	227142	191458	54746	54746
refbc_138046_AF524994	436	48942	198862	66394	234362	203122	60870	60870
refbc_138046_EU213786	461	48942	207382	66394	243362	210922	60870	60870
refbc_138046_EU213787	461	48942	207382	66394	243362	210922	60870	60870
refbc_138046_EU213788	441	48942	198862	66394	234362	203122	60870	60870
refbc_138053_AF524970	383	41174	187502	53906	210342	177298	54746	54746
refbc_138053_EU811954	341	36170	187502	53906	193542	167622	48942	48942
refbc_138055_AF524973	383	41174	187502	53906	210342	177298	54746	54746
refbc_138055_EU811949	319	36170	178982	53906	198862	167622	48942	48942
refbc_138055_EU811950	330	36170	178982	53906	185142	167622	48942	48942
refbc_138062_AF524980	386	41174	187502	53906	218742	184378	54746	54746
refbc_138062_EU811953	353	41174	187502	53906	201942	170218	48942	48942
refbc_13821_GU135302	501	56426	207382	66394	261362	226522	67314	67314
refbc_13821_GU592490	394	41174	198862	53906	218742	184378	54746	54746
refbc_13824_GQ435002	388	41174	187502	53906	218742	184378	54746	54746
refbc_13824_GQ435003	389	41174	187502	53906	218742	184378	54746	54746
refbc_13824_GU135305	493	56426	207382	66394	252362	218722	67314	67314
refbc_13824_GU592479	389	41174	187502	53906	218742	184378	54746	54746
refbc_13824_GU592480	389	41174	187502	53906	218742	184378	54746	54746
refbc_13824_GU592481	389	41174	187502	53906	218742	184378	54746	54746
refbc_13824_GU592482	388	41174	187502	53906	218742	184378	54746	54746
refbc_13841_EU750650	213	27122	159102	24758	134818	111978	31486	31486
refbc_13841_EU750651	213	27122	159102	24758	167622	139222	31486	31486
refbc_138521_AF524999	384	41174	187502	53906	210342	177298	54746	54746
refbc_138521_EU811944	350	41174	187502	53906	201942	170218	48942	48942
refbc_138527_AF524964	385	41174	187502	53906	218742	184378	54746	54746
refbc_138527_EU811947	352	41174	187502	53906	201942	170218	48942	48942
refbc_138601_AB250745	270	31486	170462	35490	184662	153422	41174	41174
refbc_138601_AB250746	263	31486	170462	35490	171922	153422	41174	41174
refbc_138601_AB250747	270	31486	170462	35490	184662	153422	41174	41174
refbc_139010_AF195722	384	41174	187502	53906	210342	177298	54746	54746
refbc_139010_FJ808515	335	36170	178982	53906	198862	167622	48942	48942
refbc_139010_FJ808516	382	41174	187502	53906	210342	177298	54746	54746
refbc_139010_FJ808517	339	36170	187502	53906	198862	167622	48942	48942
refbc_139010_FJ808518	341	36170	187502	53906	193542	167622	48942	48942
refbc_139010_FJ808519	335	36170	178982	53906	198862	167622	48942	48942
refbc_139010_FJ808520	384	41174	187502	53906	210342	177298	54746	54746
refbc_139010_FJ808521	381	41174	187502	53906	210342	177298	54746	54746
refbc_139010_FJ808522	343	36170	187502	53906	198862	167622	48942	48942
refbc_139010_FJ808523	336	36170	178982	53906	193542	163138	48942	48942
refbc_139010_FJ808524	373	41174	187502	53906	210342	177298	54746	54746
refbc_139405_AY211436	411	41174	198862	53906	227142	191458	54746	54746
refbc_139405_AY211437	411	41174	198862	53906	227142	191458	54746	54746
refbc_140786_GQ223643	503	56426	207382	66394	261362	226522	67314	67314
refbc_140786_GQ223644	503	56426	207382	66394	261362	226522	67314	67314
refbc_140788_GQ223645	503	56426	207382	66394	261362	226522	67314	67314
refbc_140788_GQ223646	503	56426	207382	66394	261362	226522	67314	67314
refbc_140788_GQ223652	503	56426	207382	66394	261362	226522	67314	67314
refbc_140788_GQ223654	503	56426	207382	66394	261362	226522	67314	67314
refbc_140808_GQ223671	503	56426	207382	66394	261362	226522	67314	67314
refbc_140808_GQ223672	503	56426	207382	66394	261362	226522	67314	67314
refbc_140808_GQ223673	503	56426	207382	66394	261362	226522	67314	67314
refbc_140850_GQ223703	493	56426	207382	66394	252362	218722	67314	67314
refbc_140850_GQ223704	493	56426	207382	66394	252362	218722	67314	67314
refbc_140997_EF127128	255	31486	170462	30846	167622	139222	36170	36170
refbc_140997_EU500288	247	31486	170462	30846	148978	123738	36170	36170
refbc_140997_FJ395483	231	27122	159102	30846	167622	139222	36170	36170
refbc_140997_FJ493304	272	31486	170462	35490	156322	129878	41174	41174
refbc_140997_FN687519	270	31486	170462	35490	148522	123398	41174	41174
refbc_141466_EF590674	375	41174	187502	53906	210342	177298	54746	54746
refbc_141466_GQ248251	470	48942	207382	66394	243362	210922	60870	60870
refbc_141575_FJ038855	515	56426	218742	66394	270362	234322	67314	67314
refbc_141575_GQ428696	539	56426	218742	66394	272546	235542	77162	77162
refbc_141575_GQ428697	515	56426	218742	66394	270362	234322	67314	67314
refbc_145511_FJ459721	359	41174	187502	53906	201942	170218	48942	48942
refbc_145511_FJ459722	359	41174	187502	53906	201942	170218	48942	48942
refbc_145745_EF419652	490	56426	207382	66394	252362	218722	67314	67314
refbc_145745_EF419653	490	56426	207382	66394	252362	218722	67314	67314
refbc_145745_EF419654	490	56426	207382	66394	252362	218722	67314	67314
refbc_145745_EF419655	490	56426	207382	66394	252362	218722	67314	67314
refbc_145745_EF419656	492	56426	207382	66394	252362	218722	67314	67314
refbc_145745_EF679752	533	56426	218742	66394	270362	234322	77162	77162
refbc_145746_EF419561	472	48942	207382	66394	243362	210922	60870	60870
refbc_145746_EF419562	474	48942	207382	66394	243362	210922	60870	60870
refbc_145747_EF419644	464	48942	207382	66394	243362	210922	60870	60870
refbc_145747_EF419645	464	48942	207382	66394	243362	210922	60870	60870
refbc_145747_EF419646	464	48942	207382	66394	243362	210922	60870	60870
refbc_145748_EF419568	465	48942	207382	66394	243362	210922	60870	60870
refbc_145748_EF419569	459	48942	207382	66394	243362	210922	60870	60870
refbc_145748_EF419570	459	48942	207382	66394	243362	210922	60870	60870
refbc_145748_EF419571	458	48942	207382	66394	243362	210922	60870	60870
refbc_145751_EF419585	457	48942	207382	66394	243362	210922	60870	60870
refbc_145751_EF419586	456	48942	207382	66394	243362	210922	60870	60870
refbc_145751_EF419587	457	48942	207382	66394	243362	210922	60870	60870
refbc_145752_EF419588	469	48942	207382	66394	243362	210922	60870	60870
refbc_145752_EF419589	469	48942	207382	66394	243362	210922	60870	60870
refbc_145752_EF419590	468	48942	207382	66394	243362	210922	60870	60870
refbc_145752_EF419591	468	48942	207382	66394	243362	210922	60870	60870
refbc_145753_EF419601	461	48942	207382	66394	243362	210922	60870	60870
refbc_145753_EF419602	461	48942	207382	66394	243362	210922	60870	60870
refbc_145753_EF419603	461	48942	207382	66394	243362	210922	60870	60870
refbc_145753_EF419604	461	48942	207382	66394	243362	210922	60870	60870
refbc_145754_EF419599	464	48942	207382	66394	243362	210922	60870	60870
refbc_145754_EF419600	462	48942	207382	66394	243362	210922	60870	60870
refbc_145754_EF590714	394	41174	198862	53906	218742	184378	54746	54746
refbc_145754_GQ248338	500	56426	207382	66394	261362	226522	67314	67314
refbc_145756_EF419572	469	48942	207382	66394	243362	210922	60870	60870
refbc_145756_EF419573	473	48942	207382	66394	243362	210922	60870	60870
refbc_145756_EF419574	465	48942	207382	66394	243362	210922	60870	60870
refbc_145756_EF419575	465	48942	207382	66394	243362	210922	60870	60870
refbc_145756_EF419576	467	48942	207382	66394	243362	210922	60870	60870
refbc_146505_EU359378	396	41174	198862	53906	218742	184378	54746	54746
refbc_146505_GQ434981	365	41174	187502	53906	201942	170218	48942	48942
refbc_146505_GQ434982	365	41174	187502	53906	201942	170218	48942	48942
refbc_146995_AB234760	381	41174	187502	53906	210342	177298	54746	54746
refbc_146995_AB234761	381	41174	187502	53906	210342	177298	54746	54746
refbc_146995_AB234762	381	41174	187502	53906	210342	177298	54746	54746
refbc_146995_AB234763	381	41174	187502	53906	210342	177298	54746	54746
refbc_146995_AB234764	381	41174	187502	53906	210342	177298	54746	54746
refbc_146995_AB234765	381	41174	187502	53906	210342	177298	54746	54746
refbc_146995_AB234770	359	41174	187502	53906	201942	170218	48942	48942
refbc_146995_AB234776	381	41174	187502	53906	210342	177298	54746	54746
refbc_146995_AB234777	381	41174	187502	53906	210342	177298	54746	54746
refbc_146995_AB234779	381	41174	187502	53906	210342	177298	54746	54746
refbc_146995_EF091608	381	41174	187502	53906	210342	177298	54746	54746
refbc_146995_GQ435133	434	48942	198862	66394	225362	195322	60870	60870
refbc_146996_EF091614	381	41174	187502	53906	210342	177298	54746	54746
refbc_146996_GQ435132	361	41174	187502	53906	201942	170218	48942	48942
refbc_147003_AB234743	381	41174	187502	53906	210342	177298	54746	54746
refbc_147003_AB234744	381	41174	187502	53906	210342	177298	54746	54746
refbc_147003_AB234745	381	41174	187502	53906	210342	177298	54746	54746
refbc_147003_AB234746	381	41174	187502	53906	210342	177298	54746	54746
refbc_147003_AB234747	381	41174	187502	53906	210342	177298	54746	54746
refbc_147003_AB234766	403	41174	198862	53906	227142	191458	54746	54746
refbc_147003_AB234767	381	41174	187502	53906	210342	177298	54746	54746
refbc_147003_AB234768	381	41174	187502	53906	210342	177298	54746	54746
refbc_147003_EF091627	381	41174	187502	53906	210342	177298	54746	54746
refbc_147275_EF590747	392	41174	198862	53906	218742	184378	54746	54746
refbc_147460_GQ435301	521	56426	218742	66394	270362	234322	67314	67314
refbc_147623_FJ744168	304	36170	178982	35490	184662	153422	41174	41174
refbc_147623_FJ744169	303	36170	178982	35490	184662	153422	41174	41174
refbc_147623_FJ744170	306	36170	178982	53906	184662	153422	41174	41174
refbc_147629_FJ744174	300	36170	178982	35490	184662	153422	41174	41174
refbc_147629_FJ744175	303	36170	178982	35490	171922	153422	41174	41174
refbc_147629_FJ744176	304	36170	178982	35490	184662	153422	41174	41174
refbc_147630_FJ744177	299	36170	178982	35490	184662	153422	41174	41174
refbc_147630_FJ744178	300	36170	178982	35490	184662	153422	41174	41174
refbc_147630_FJ744179	300	36170	178982	35490	164122	136358	41174	41174
refbc_147637_FJ744180	301	36170	178982	35490	171922	153422	41174	41174
refbc_147637_FJ744181	305	36170	178982	53906	184662	153422	41174	41174
refbc_147944_EU125563	545	56426	218742	66394	272546	235542	77162	77162
refbc_147944_EU125564	545	56426	218742	66394	272546	235542	77162	77162
refbc_147945_EU125557	531	56426	218742	66394	270362	234322	77162	77162
refbc_147945_EU125558	531	56426	218742	66394	270362	234322	77162	77162
refbc_147945_EU125559	531	56426	218742	66394	270362	234322	77162	77162
refbc_147945_EU125560	531	56426	218742	66394	270362	234322	77162	77162
refbc_147945_EU125561	531	56426	218742	66394	270362	234322	77162	77162
refbc_148566_GU135294	502	56426	207382	66394	261362	226522	67314	67314
refbc_148566_GU135402	484	56426	207382	66394	252362	218722	67314	67314
refbc_148671_AF524967	388	41174	187502	53906	218742	184378	54746	54746
refbc_148671_EU812000	354	41174	187502	53906	201942	170218	48942	48942
refbc_148683_AF524969	385	41174	187502	53906	218742	184378	54746	54746
refbc_148683_EU811996	352	41174	187502	53906	201942	170218	48942	48942
refbc_149368_GU372809	384	41174	187502	53906	210342	177298	54746	54746
refbc_149368_GU372810	397	41174	198862	53906	218742	184378	54746	54746
refbc_149368_GU372811	365	41174	187502	53906	201942	170218	48942	48942
refbc_149368_GU372813	371	41174	187502	53906	210342	177298	54746	54746
refbc_149368_GU372816	364	41174	187502	53906	201942	170218	48942	48942
refbc_149368_GU372818	371	41174	187502	53906	210342	177298	54746	54746
refbc_149368_GU372819	368	41174	187502	53906	210342	177298	54746	54746
refbc_149410_AM690563	384	41174	187502	53906	210342	177298	54746	54746
refbc_149410_AM690586	384	41174	187502	53906	210342	177298	54746	54746
refbc_151437_AY500596	257	31486	170462	30846	167622	139222	36170	36170
refbc_151437_AY500599	257	31486	170462	30846	167622	139222	36170	36170
refbc_152358_GQ434990	516	56426	218742	66394	270362	234322	67314	67314
refbc_152358_GQ434991	515	56426	218742	66394	270362	234322	67314	67314
refbc_152358_GQ434992	520	56426	218742	66394	270362	234322	67314	67314
refbc_154432_FN669012	213	27122	159102	24758	134818	111978	31486	31486
refbc_154432_FN669013	214	27122	159102	24758	156058	139222	31486	31486
refbc_154432_FN669014	211	27122	159102	24758	167622	139222	31486	31486
refbc_155299_EU153961	438	48942	198862	66394	234362	203122	60870	60870
refbc_155299_GQ435457	375	41174	187502	53906	210342	177298	54746	54746
refbc_155640_GQ435160	485	56426	207382	66394	252362	218722	67314	67314
refbc_155640_GU135311	421	48942	198862	66394	225362	195322	60870	60870
refbc_155759_AY620868	423	48942	198862	66394	225362	195322	60870	60870
refbc_155759_AY620869	394	41174	198862	53906	218742	184378	54746	54746
refbc_155759_AY620870	367	41174	187502	53906	210342	177298	54746	54746
refbc_155759_AY620871	367	41174	187502	53906	210342	177298	54746	54746
refbc_155759_AY620872	446	48942	198862	66394	234362	203122	60870	60870
refbc_155759_AY620873	446	48942	198862	66394	234362	203122	60870	60870
refbc_155759_AY620874	393	41174	198862	53906	218742	184378	54746	54746
refbc_155759_AY620875	395	41174	198862	53906	218742	184378	54746	54746
refbc_155759_AY620876	446	48942	198862	66394	234362	203122	60870	60870
refbc_155759_AY620877	393	41174	198862	53906	218742	184378	54746	54746
refbc_155759_AY620878	417	48942	198862	53906	227142	191458	54746	54746
refbc_155759_AY620879	394	41174	198862	53906	218742	184378	54746	54746
refbc_155759_AY620880	398	41174	198862	53906	218742	184378	54746	54746
refbc_155759_AY620881	423	48942	198862	66394	225362	195322	60870	60870
refbc_155759_AY620882	423	48942	198862	66394	225362	195322	60870	60870
refbc_155759_AY620883	391	41174	198862	53906	218742	184378	54746	54746
refbc_155759_AY620884	452	48942	207382	66394	234362	203122	60870	60870
refbc_155759_AY620885	395	41174	198862	53906	218742	184378	54746	54746
refbc_155759_AY620886	424	48942	198862	66394	225362	195322	60870	60870
refbc_155764_AY620887	437	48942	198862	66394	234362	203122	60870	60870
refbc_155764_AY620888	422	48942	198862	66394	225362	195322	60870	60870
refbc_155764_AY620890	446	48942	198862	66394	234362	203122	60870	60870
refbc_155764_AY620891	422	48942	198862	66394	225362	195322	60870	60870
refbc_155764_AY620892	422	48942	198862	66394	225362	195322	60870	60870
refbc_155764_AY620893	422	48942	198862	66394	225362	195322	60870	60870
refbc_155764_AY620894	446	48942	198862	66394	234362	203122	60870	60870
refbc_155764_AY620895	421	48942	198862	66394	225362	195322	60870	60870
refbc_156271_GQ463511	518	56426	218742	66394	270362	234322	67314	67314
refbc_156483_GQ428699	593	65474	227262	83366	291986	252342	77162	77162
refbc_156483_GQ428700	599	65474	227262	83366	301706	260742	77162	77162
refbc_156483_GQ429119	273	31486	170462	35490	171922	153422	41174	41174
refbc_156483_GQ982376	515	56426	218742	66394	270362	234322	67314	67314
refbc_157217_AM922068	155	21434	139222	20914	153422	122182	27122	27122
refbc_157217_AM922069	155	21434	139222	20914	153422	122182	27122	27122
refbc_157217_AM922070	155	21434	139222	20914	153422	122182	27122	27122
refbc_157220_AM922077	156	21434	139222	20914	142838	122182	27122	27122
refbc_157220_AM922078	156	21434	139222	20914	153422	122182	27122	27122
refbc_157220_DQ265745	223	27122	159102	30846	167622	139222	36170	36170
refbc_157443_AB109148	336	36170	178982	53906	193542	167622	48942	48942
refbc_157443_GQ435173	301	36170	178982	35490	171922	153422	41174	41174
refbc_158524_EU153991	357	41174	187502	53906	201942	170218	48942	48942
refbc_158524_FJ038959	312	36170	178982	53906	184662	153422	48942	48942
refbc_159059_GQ435447	472	48942	207382	66394	243362	210922	60870	60870
refbc_159059_GQ435448	472	48942	207382	66394	243362	210922	60870	60870
refbc_159059_GQ435449	471	48942	207382	66394	243362	210922	60870	60870
refbc_159421_AY032814	284	31486	170462	35490	156322	129878	41174	41174
refbc_159421_AY220136	274	31486	170462	35490	184662	153422	41174	41174
refbc_159423_AY032806	264	31486	170462	35490	184662	153422	41174	41174
refbc_159423_AY219300	263	31486	170462	35490	184662	153422	41174	41174
refbc_159423_AY219301	264	31486	170462	35490	148522	123398	41174	41174
refbc_159423_AY219302	263	31486	170462	35490	184662	153422	41174	41174
refbc_159423_AY219303	263	31486	170462	35490	184662	153422	41174	41174
refbc_159423_AY219304	263	31486	170462	35490	184662	153422	41174	41174
refbc_159423_AY219305	264	31486	170462	35490	184662	153422	41174	41174
refbc_159423_AY219306	263	31486	170462	35490	148522	123398	41174	41174
refbc_159423_AY219307	263	31486	170462	35490	184662	153422	41174	41174
refbc_159423_AY219308	264	31486	170462	35490	171922	153422	41174	41174
refbc_159423_AY219309	263	31486	170462	35490	184662	153422	41174	41174
refbc_159423_AY219310	263	31486	170462	35490	184662	153422	41174	41174
refbc_159424_AY032807	263	31486	170462	35490	171922	153422	41174	41174
refbc_159424_AY219288	262	31486	170462	35490	184662	153422	36170	36170
refbc_159424_AY219289	262	31486	170462	35490	184662	153422	36170	36170
refbc_159424_AY219290	262	31486	170462	35490	171922	153422	36170	36170
refbc_159424_AY219291	262	31486	170462	35490	184662	153422	36170	36170
refbc_159424_AY219292	262	31486	170462	35490	148522	123398	36170	36170
refbc_159424_AY219293	262	31486	170462	35490	184662	153422	36170	36170
refbc_159424_AY219294	262	31486	170462	35490	148522	123398	36170	36170
refbc_159424_AY219295	262	31486	170462	35490	184662	153422	36170	36170
refbc_159424_AY219296	262	31486	170462	35490	171922	153422	36170	36170
refbc_159424_AY219297	262	31486	170462	35490	184662	153422	36170	36170
refbc_159424_AY219298	262	31486	170462	35490	184662	153422	36170	36170
refbc_159424_AY219299	262	31486	170462	35490	184662	153422	36170	36170
refbc_159425_AY032810	263	31486	170462	35490	171922	153422	41174	41174
refbc_159425_DQ238757	296	36170	178982	35490	184662	153422	41174	41174
refbc_159425_EF590722	287	31486	178982	35490	184662	153422	41174	41174
refbc_159425_GQ248361	346	36170	187502	53906	193542	163138	48942	48942
refbc_159426_AY032817	270	31486	170462	35490	148522	123398	41174	41174
refbc_159426_AY220137	270	31486	170462	35490	148522	123398	41174	41174
refbc_159427_AY032813	264	31486	170462	35490	184662	153422	41174	41174
refbc_159427_AY220140	264	31486	170462	35490	148522	123398	41174	41174
refbc_159428_AY032816	265	31486	170462	35490	184662	153422	41174	41174
refbc_159428_AY220135	265	31486	170462	35490	148522	123398	41174	41174
refbc_159630_EF211011	428	48942	198862	66394	225362	195322	60870	60870
refbc_159630_FM998654	397	41174	198862	53906	218742	184378	54746	54746
refbc_160852_EU123016	402	41174	198862	53906	218742	184378	54746	54746
refbc_160852_EU123017	402	41174	198862	53906	218742	184378	54746	54746
refbc_160852_EU123018	402	41174	198862	53906	218742	184378	54746	54746
refbc_160852_EU338480	402	41174	198862	53906	218742	184378	54746	54746
refbc_161097_GU454500	236	31486	159102	30846	156058	139222	36170	36170
refbc_161097_GU454501	234	27122	159102	30846	167622	139222	36170	36170
refbc_161097_GU454502	235	27122	159102	30846	156058	139222	36170	36170
refbc_161101_GU454517	230	27122	159102	30846	167622	139222	36170	36170
refbc_161101_GU454518	230	27122	159102	30846	134818	111978	36170	36170
refbc_161101_GU454519	230	27122	159102	30846	167622	139222	36170	36170
refbc_161101_GU454527	229	27122	159102	30846	134818	111978	36170	36170
refbc_161105_GU454521	226	27122	159102	30846	167622	139222	36170	36170
refbc_161105_GU454522	226	27122	159102	30846	134818	111978	36170	36170
refbc_161105_GU454523	226	27122	159102	30846	134818	111978	36170	36170
refbc_161106_GU454524	224	27122	159102	30846	156058	139222	36170	36170
refbc_161106_GU454525	224	27122	159102	30846	167622	139222	36170	36170
refbc_161107_GU454526	230	27122	159102	30846	167622	139222	36170	36170
refbc_161107_GU454528	230	27122	159102	30846	167622	139222	36170	36170
refbc_161107_GU454529	225	27122	159102	30846	167622	139222	36170	36170
refbc_161112_GU454554	233	27122	159102	30846	156058	139222	36170	36170
refbc_161112_GU454555	233	27122	159102	30846	141898	117858	36170	36170
refbc_161114_GU454557	242	31486	170462	30846	167622	139222	36170	36170
refbc_161114_GU454558	242	31486	170462	30846	167622	139222	36170	36170
refbc_161114_GU454559	242	31486	170462	30846	156058	139222	36170	36170
refbc_161115_GU454560	232	27122	159102	30846	156058	139222	36170	36170
refbc_161115_GU454561	233	27122	159102	30846	167622	139222	36170	36170
refbc_161115_GU454562	232	27122	159102	30846	156058	139222	36170	36170
refbc_161115_GU454563	231	27122	159102	30846	167622	139222	36170	36170
refbc_161115_GU454564	232	27122	159102	30846	167622	139222	36170	36170
refbc_161118_GU454567	231	27122	159102	30846	156058	139222	36170	36170
refbc_161118_GU454568	231	27122	159102	30846	167622	139222	36170	36170
refbc_161118_GU454569	231	27122	159102	30846	134818	111978	36170	36170
refbc_161118_GU454570	231	27122	159102	30846	167622	139222	36170	36170
refbc_161118_GU454571	231	27122	159102	30846	167622	139222	36170	36170
refbc_161118_GU454572	231	27122	159102	30846	134818	111978	36170	36170
refbc_161118_GU454573	231	27122	159102	30846	167622	139222	36170	36170
refbc_161124_GU454531	231	27122	159102	30846	134818	111978	36170	36170
refbc_161124_GU454532	231	27122	159102	30846	167622	139222	36170	36170
refbc_161124_GU454533	231	27122	159102	30846	167622	139222	36170	36170
refbc_161124_GU454534	231	27122	159102	30846	167622	139222	36170	36170
refbc_161124_GU454535	231	27122	159102	30846	167622	139222	36170	36170
refbc_161126_GU454537	226	27122	159102	30846	167622	139222	36170	36170
refbc_161126_GU454538	226	27122	159102	30846	156058	139222	36170	36170
refbc_161126_GU454539	226	27122	159102	30846	134818	111978	36170	36170
refbc_161126_GU454540	226	27122	159102	30846	134818	111978	36170	36170
refbc_161126_GU454541	226	27122	159102	30846	167622	139222	36170	36170
refbc_161127_GU454542	232	27122	159102	30846	156058	139222	36170	36170
refbc_161127_GU454543	232	27122	159102	30846	156058	139222	36170	36170
refbc_161127_GU454544	232	27122	159102	30846	167622	139222	36170	36170
refbc_161128_GU454545	231	27122	159102	30846	156058	139222	36170	36170
refbc_161128_GU454546	231	27122	159102	30846	167622	139222	36170	36170
refbc_161128_GU454547	231	27122	159102	30846	134818	111978	36170	36170
refbc_161128_GU454548	231	27122	159102	30846	167622	139222	36170	36170
refbc_161128_GU454549	232	27122	159102	30846	167622	139222	36170	36170
refbc_161130_GU454550	235	27122	159102	30846	141898	117858	36170	36170
refbc_161130_GU454551	234	27122	159102	30846	167622	139222	36170	36170
refbc_161395_FJ914368	365	41174	187502	53906	201942	170218	48942	48942
refbc_161395_FJ914369	365	41174	187502	53906	201942	170218	48942	48942
refbc_161395_FJ914370	365	41174	187502	53906	201942	170218	48942	48942
refbc_161395_FJ914371	366	41174	187502	53906	201942	170218	48942	48942
refbc_161395_FJ914372	367	41174	187502	53906	210342	177298	54746	54746
refbc_161395_FJ914373	365	41174	187502	53906	201942	170218	48942	48942
refbc_161395_FJ914374	367	41174	187502	53906	210342	177298	54746	54746
refbc_161395_FJ914375	365	41174	187502	53906	201942	170218	48942	48942
refbc_161395_GQ435468	365	41174	187502	53906	201942	170218	48942	48942
refbc_161395_GQ435469	365	41174	187502	53906	201942	170218	48942	48942
refbc_161396_FJ914376	349	41174	187502	53906	201942	170218	48942	48942
refbc_161396_FJ914377	369	41174	187502	53906	210342	177298	54746	54746
refbc_161396_FJ914378	370	41174	187502	53906	210342	177298	54746	54746
refbc_161397_FJ914381	502	56426	207382	66394	261362	226522	67314	67314
refbc_161397_FJ914382	503	56426	207382	66394	261362	226522	67314	67314
refbc_161397_FJ914383	503	56426	207382	66394	261362	226522	67314	67314
refbc_161397_FJ914384	503	56426	207382	66394	261362	226522	67314	67314
refbc_161397_FJ914385	503	56426	207382	66394	261362	226522	67314	67314
refbc_161397_FJ914386	503	56426	207382	66394	261362	226522	67314	67314
refbc_161397_GQ435163	473	48942	207382	66394	243362	210922	60870	60870
refbc_161397_GQ435164	473	48942	207382	66394	243362	210922	60870	60870
refbc_161873_EU734469	387	41174	187502	53906	218742	184378	54746	54746
refbc_161873_EU734470	387	41174	187502	53906	218742	184378	54746	54746
refbc_162707_DQ208844	505	56426	207382	66394	261362	226522	67314	67314
refbc_162707_DQ208845	503	56426	207382	66394	261362	226522	67314	67314
refbc_162707_DQ208846	475	48942	207382	66394	252362	218722	60870	60870
refbc_162707_DQ208847	505	56426	207382	66394	261362	226522	67314	67314
refbc_162707_DQ208848	495	56426	207382	66394	261362	226522	67314	67314
refbc_162707_DQ208849	490	56426	207382	66394	252362	218722	67314	67314
refbc_162707_DQ208850	506	56426	207382	66394	261362	226522	67314	67314
refbc_162707_DQ208851	506	56426	207382	66394	261362	226522	67314	67314
refbc_162707_DQ208852	476	48942	207382	66394	252362	218722	60870	60870
refbc_162707_DQ208853	477	48942	207382	66394	252362	218722	60870	60870
refbc_162707_DQ208854	529	56426	218742	66394	270362	234322	77162	77162
refbc_162707_DQ208855	490	56426	207382	66394	252362	218722	67314	67314
refbc_162707_DQ501959	376	41174	187502	53906	210342	177298	54746	54746
refbc_162748_FJ038921	361	41174	187502	53906	201942	170218	48942	48942
refbc_162748_FJ038922	387	41174	187502	53906	218742	184378	54746	54746
refbc_162748_GQ428651	384	41174	187502	53906	210342	177298	54746	54746
refbc_162769_FJ038923	452	48942	207382	66394	234362	203122	60870	60870
refbc_162769_FJ038924	452	48942	207382	66394	234362	203122	60870	60870
refbc_162769_GQ428689	458	48942	207382	66394	243362	210922	60870	60870
refbc_162770_FJ038925	457	48942	207382	66394	243362	210922	60870	60870
refbc_162770_FJ038926	469	48942	207382	66394	243362	210922	60870	60870
refbc_162770_GQ428690	480	56426	207382	66394	252362	218722	60870	60870
refbc_16364_DQ786563	392	41174	198862	53906	218742	184378	54746	54746
refbc_16364_DQ786564	372	41174	187502	53906	210342	177298	54746	54746
refbc_164927_EU410222	345	36170	187502	53906	198862	167622	48942	48942
refbc_164927_EU410223	358	41174	187502	53906	201942	170218	48942	48942
refbc_164928_EU410224	350	41174	187502	53906	201942	170218	48942	48942
refbc_164928_EU410225	348	41174	187502	53906	193542	167622	48942	48942
refbc_164928_EU410226	345	36170	187502	53906	198862	167622	48942	48942
refbc_164936_EU410228	350	41174	187502	53906	201942	170218	48942	48942
refbc_164936_EU410229	343	36170	187502	53906	193542	163138	48942	48942
refbc_164936_EU410230	345	36170	187502	53906	198862	167622	48942	48942
refbc_164937_EU410231	350	41174	187502	53906	201942	170218	48942	48942
refbc_164937_EU410232	343	36170	187502	53906	193542	167622	48942	48942
refbc_164942_EU410233	345	36170	187502	53906	198862	167622	48942	48942
refbc_164942_EU410234	345	36170	187502	53906	193542	167622	48942	48942
refbc_164942_EU410235	345	36170	187502	53906	198862	167622	48942	48942
refbc_164942_EU410236	345	36170	187502	53906	198862	167622	48942	48942
refbc_164942_EU410237	345	36170	187502	53906	198862	167622	48942	48942
refbc_164942_EU410238	345	36170	187502	53906	193542	167622	48942	48942
refbc_164942_EU410239	345	36170	187502	53906	193542	163138	48942	48942
refbc_164942_EU410240	345	36170	187502	53906	198862	167622	48942	48942
refbc_164942_EU410241	345	36170	187502	53906	198862	167622	48942	48942
refbc_164942_GU135332	529	56426	218742	66394	270362	234322	77162	77162
refbc_165323_AY721728	319	36170	178982	53906	198862	167622	48942	48942
refbc_165323_AY721729	314	36170	178982	53906	171922	142838	48942	48942
refbc_165323_AY721730	315	36170	178982	53906	171922	153422	48942	48942
refbc_165323_AY721731	319	36170	178982	53906	198862	167622	48942	48942
refbc_165323_AY721732	313	36170	178982	53906	171922	142838	48942	48942
refbc_165323_AY721733	319	36170	178982	53906	185142	156058	48942	48942
refbc_165323_AY721734	319	36170	178982	53906	198862	167622	48942	48942
refbc_165323_AY721735	319	36170	178982	53906	198862	167622	48942	48942
refbc_165323_AY721736	318	36170	178982	53906	171922	153422	48942	48942
refbc_165323_AY721737	341	36170	187502	53906	193542	167622	48942	48942
refbc_165323_AY721778	321	36170	178982	53906	198862	167622	48942	48942
refbc_165323_AY721779	313	36170	178982	53906	171922	142838	48942	48942
refbc_165323_AY721780	317	36170	178982	53906	184662	153422	48942	48942
refbc_165323_AY721781	320	36170	178982	53906	198862	167622	48942	48942
refbc_165323_AY721782	319	36170	178982	53906	185142	156058	48942	48942
refbc_165323_AY721783	320	36170	178982	53906	198862	167622	48942	48942
refbc_165323_AY721784	320	36170	178982	53906	185142	167622	48942	48942
refbc_165323_AY721785	315	36170	178982	53906	184662	153422	48942	48942
refbc_165323_AY721786	317	36170	178982	53906	184662	153422	48942	48942
refbc_165323_AY721787	313	36170	178982	53906	184662	153422	48942	48942
refbc_165323_AY721845	329	36170	178982	53906	198862	167622	48942	48942
refbc_165323_AY721846	330	36170	178982	53906	185142	167622	48942	48942
refbc_165323_AY721847	329	36170	178982	53906	185142	167622	48942	48942
refbc_165323_AY721848	328	36170	178982	53906	198862	167622	48942	48942
refbc_165323_AY721849	330	36170	178982	53906	185142	156058	48942	48942
refbc_165323_AY721850	329	36170	178982	53906	198862	167622	48942	48942
refbc_165323_AY721851	330	36170	178982	53906	198862	167622	48942	48942
refbc_165323_AY721852	329	36170	178982	53906	185142	156058	48942	48942
refbc_165323_AY721853	330	36170	178982	53906	198862	167622	48942	48942
refbc_165323_AY721854	330	36170	178982	53906	185142	167622	48942	48942
refbc_165350_AY721758	337	36170	187502	53906	193542	163138	48942	48942
refbc_165350_AY721759	337	36170	187502	53906	193542	163138	48942	48942
refbc_165350_AY721760	337	36170	187502	53906	193542	167622	48942	48942
refbc_165350_AY721761	338	36170	187502	53906	198862	167622	48942	48942
refbc_165350_AY721762	315	36170	178982	53906	184662	153422	48942	48942
refbc_165350_AY721763	339	36170	187502	53906	198862	167622	48942	48942
refbc_165350_AY721764	339	36170	187502	53906	193542	163138	48942	48942
refbc_165350_AY721765	338	36170	187502	53906	198862	167622	48942	48942
refbc_165350_AY721766	338	36170	187502	53906	193542	163138	48942	48942
refbc_165350_AY721767	339	36170	187502	53906	193542	167622	48942	48942
refbc_165350_AY721828	339	36170	187502	53906	193542	167622	48942	48942
refbc_165350_AY721829	328	36170	178982	53906	198862	167622	48942	48942
refbc_165350_AY721830	329	36170	178982	53906	198862	167622	48942	48942
refbc_165350_AY721831	329	36170	178982	53906	185142	156058	48942	48942
refbc_165350_AY721832	329	36170	178982	53906	198862	167622	48942	48942
refbc_165350_AY721833	328	36170	178982	53906	185142	167622	48942	48942
refbc_165350_AY721834	325	36170	178982	53906	198862	167622	48942	48942
refbc_165350_AY721835	340	36170	187502	53906	198862	167622	48942	48942
refbc_165350_AY721836	329	36170	178982	53906	185142	167622	48942	48942
refbc_165350_AY721891	339	36170	187502	53906	198862	167622	48942	48942
refbc_165350_AY721892	329	36170	178982	53906	198862	167622	48942	48942
refbc_165350_AY721893	329	36170	178982	53906	185142	156058	48942	48942
refbc_165350_AY721894	329	36170	178982	53906	185142	156058	48942	48942
refbc_165350_AY721895	330	36170	178982	53906	198862	167622	48942	48942
refbc_165350_AY721896	330	36170	178982	53906	185142	167622	48942	48942
refbc_165350_AY721897	329	36170	178982	53906	198862	167622	48942	48942
refbc_165350_AY721898	329	36170	178982	53906	198862	167622	48942	48942
refbc_165350_AY721899	329	36170	178982	53906	198862	167622	48942	48942
refbc_165350_AY721900	277	31486	170462	35490	184662	153422	41174	41174
refbc_165350_AY721901	330	36170	178982	53906	198862	167622	48942	48942
refbc_165350_FJ848105	280	31486	170462	35490	184662	153422	41174	41174
refbc_165545_FJ213610	443	48942	198862	66394	234362	203122	60870	60870
refbc_165545_FJ213611	443	48942	198862	66394	234362	203122	60870	60870
refbc_165545_FJ213612	438	48942	198862	66394	234362	203122	60870	60870
refbc_165545_FJ213613	443	48942	198862	66394	234362	203122	60870	60870
refbc_165545_FJ213614	443	48942	198862	66394	234362	203122	60870	60870
refbc_165545_FJ213615	443	48942	198862	66394	234362	203122	60870	60870
refbc_165545_FJ213617	443	48942	198862	66394	234362	203122	60870	60870
refbc_165651_GU121988	479	48942	207382	66394	252362	218722	60870	60870
refbc_165651_GU121989	479	48942	207382	66394	252362	218722	60870	60870
refbc_165651_GU121990	479	48942	207382	66394	252362	218722	60870	60870
refbc_165651_GU121991	479	48942	207382	66394	252362	218722	60870	60870
refbc_165702_EF537211	506	56426	207382	66394	261362	226522	67314	67314
refbc_165702_EF537212	506	56426	207382	66394	261362	226522	67314	67314
refbc_165702_EF537213	506	56426	207382	66394	261362	226522	67314	67314
refbc_165702_EF537214	505	56426	207382	66394	261362	226522	67314	67314
refbc_165702_EF537215	506	56426	207382	66394	261362	226522	67314	67314
refbc_165702_EF537216	506	56426	207382	66394	261362	226522	67314	67314
refbc_165788_EF537206	506	56426	207382	66394	261362	226522	67314	67314
refbc_165788_EF537207	506	56426	207382	66394	261362	226522	67314	67314
refbc_165789_EF537248	514	56426	218742	66394	261362	226522	67314	67314
refbc_165789_EF537249	514	56426	218742	66394	261362	226522	67314	67314
refbc_165789_EF537250	514	56426	218742	66394	261362	226522	67314	67314
refbc_167335_EF590697	158	21434	139222	20914	153422	122182	27122	27122
refbc_167561_GQ463531	532	56426	218742	66394	270362	234322	77162	77162
refbc_167561_GQ463532	533	56426	218742	66394	270362	234322	77162	77162
refbc_167561_GQ463533	533	56426	218742	66394	270362	234322	77162	77162
refbc_168013_EF597142	331	36170	178982	53906	198862	167622	48942	48942
refbc_168013_EF597143	331	36170	178982	53906	193542	163138	48942	48942
refbc_168566_DQ978610	371	41174	187502	53906	210342	177298	54746	54746
refbc_168566_FN689729	448	48942	198862	66394	234362	203122	60870	60870
refbc_16902_EU750446	318	36170	178982	53906	184662	153422	48942	48942
refbc_16902_EU750447	381	41174	187502	53906	210342	177298	54746	54746
refbc_16915_EU359387	327	36170	178982	53906	185142	167622	48942	48942
refbc_16915_GQ435474	327	36170	178982	53906	198862	167622	48942	48942
refbc_16915_GQ435475	327	36170	178982	53906	185142	167622	48942	48942
refbc_169218_FN669078	318	36170	178982	53906	171922	153422	48942	48942
refbc_169218_FN669080	319	36170	178982	53906	185142	156058	48942	48942
refbc_170354_AM939405	318	36170	178982	53906	171922	153422	48942	48942
refbc_170354_AM939406	316	36170	178982	53906	184662	153422	48942	48942
refbc_170715_GQ434994	309	36170	178982	53906	184662	153422	41174	41174
refbc_170715_GU592489	298	36170	178982	35490	184662	153422	41174	41174
refbc_171018_EF653164	277	31486	170462	35490	184662	153422	41174	41174
refbc_171018_GQ248294	584	65474	227262	83366	291986	252342	77162	77162
refbc_171251_GQ435453	423	48942	198862	66394	225362	195322	60870	60870
refbc_171251_GQ435454	423	48942	198862	66394	225362	195322	60870	60870
refbc_172644_GQ434948	359	41174	187502	53906	201942	170218	48942	48942
refbc_172644_GU135430	354	41174	187502	53906	201942	170218	48942	48942
refbc_172651_AB291775	418	48942	198862	53906	227142	191458	54746	54746
refbc_172651_AB291776	460	48942	207382	66394	243362	210922	60870	60870
refbc_172651_AB291777	460	48942	207382	66394	243362	210922	60870	60870
refbc_172651_AB291778	422	48942	198862	66394	225362	195322	60870	60870
refbc_172651_AB291779	432	48942	198862	66394	225362	195322	60870	60870
refbc_172651_AB291780	527	56426	218742	66394	270362	234322	67314	67314
refbc_172651_AB291781	413	48942	198862	53906	227142	191458	54746	54746
refbc_172651_AB291782	460	48942	207382	66394	243362	210922	60870	60870
refbc_172651_AB291783	418	48942	198862	53906	227142	191458	54746	54746
refbc_172651_AB291784	456	48942	207382	66394	243362	210922	60870	60870
refbc_172651_AB291785	458	48942	207382	66394	243362	210922	60870	60870
refbc_172651_AB291786	418	48942	198862	53906	227142	191458	54746	54746
refbc_172651_AB291787	485	56426	207382	66394	252362	218722	67314	67314
refbc_172651_AB291788	485	56426	207382	66394	252362	218722	67314	67314
refbc_172651_AB291789	507	56426	207382	66394	261362	226522	67314	67314
refbc_172651_AB291790	482	56426	207382	66394	252362	218722	60870	60870
refbc_172651_AB291791	443	48942	198862	66394	234362	203122	60870	60870
refbc_172651_AB291792	460	48942	207382	66394	243362	210922	60870	60870
refbc_172651_AB291793	472	48942	207382	66394	243362	210922	60870	60870
refbc_172651_AB291794	482	56426	207382	66394	252362	218722	60870	60870
refbc_172651_AB291795	449	48942	207382	66394	234362	203122	60870	60870
refbc_172651_AB291796	495	56426	207382	66394	261362	226522	67314	67314
refbc_172651_AB291797	441	48942	198862	66394	234362	203122	60870	60870
refbc_172651_AB291798	502	56426	207382	66394	261362	226522	67314	67314
refbc_172651_AB291799	490	56426	207382	66394	252362	218722	67314	67314
refbc_172651_AB291800	500	56426	207382	66394	261362	226522	67314	67314
refbc_172651_AB291801	464	48942	207382	66394	243362	210922	60870	60870
refbc_172651_AB291802	486	56426	207382	66394	252362	218722	67314	67314
refbc_172651_AB291803	478	48942	207382	66394	252362	218722	60870	60870
refbc_172651_AB291804	446	48942	198862	66394	234362	203122	60870	60870
refbc_173277_AY849355	472	48942	207382	66394	243362	210922	60870	60870
refbc_173277_GQ248296	557	65474	218742	83366	282266	243942	77162	77162
refbc_173280_AY849352	472	48942	207382	66394	243362	210922	60870	60870
refbc_173280_GQ435179	472	48942	207382	66394	243362	210922	60870	60870
refbc_173280_GQ435180	472	48942	207382	66394	243362	210922	60870	60870
refbc_173386_FJ764829	180	21434	150582	24758	123398	98274	31486	31486
refbc_173386_FJ764830	179	21434	150582	24758	153422	122182	31486	31486
refbc_173656_AM265595	289	31486	178982	35490	171922	153422	41174	41174
refbc_173656_AM282987	289	31486	178982	35490	171922	153422	41174	41174
refbc_173656_AM932484	296	36170	178982	35490	184662	153422	41174	41174
refbc_173660_AM282991	289	31486	178982	35490	184662	153422	41174	41174
refbc_173660_AM282992	289	31486	178982	35490	184662	153422	41174	41174
refbc_173660_EU939276	291	36170	178982	35490	164122	136358	41174	41174
refbc_173660_EU939277	291	36170	178982	35490	171922	153422	41174	41174
refbc_173660_EU939279	291	36170	178982	35490	184662	153422	41174	41174
refbc_173848_AY941123	493	56426	207382	66394	252362	218722	67314	67314
refbc_173848_AY941127	493	56426	207382	66394	252362	218722	67314	67314
refbc_174171_GQ435208	318	36170	178982	53906	184662	153422	48942	48942
refbc_174171_GU732678	548	56426	218742	66394	272546	235542	77162	77162
refbc_175228_AY138108	354	41174	187502	53906	201942	170218	48942	48942
refbc_175228_FJ395461	363	41174	187502	53906	201942	170218	48942	48942
refbc_175694_GQ435145	257	31486	170462	30846	167622	139222	36170	36170
refbc_175694_GQ435146	257	31486	170462	30846	167622	139222	36170	36170
refbc_176602_DQ006151	397	41174	198862	53906	218742	184378	54746	54746
refbc_176602_GQ435097	368	41174	187502	53906	210342	177298	54746	54746
refbc_176858_FJ011836	301	36170	178982	35490	184662	153422	41174	41174
refbc_176858_FJ011837	301	36170	178982	35490	184662	153422	41174	41174
refbc_176858_FJ011838	301	36170	178982	35490	164122	136358	41174	41174
refbc_176859_AY211438	411	41174	198862	53906	227142	191458	54746	54746
refbc_176859_AY211439	411	41174	198862	53906	227142	191458	54746	54746
refbc_176859_AY211440	411	41174	198862	53906	227142	191458	54746	54746
refbc_176859_AY211441	411	41174	198862	53906	227142	191458	54746	54746
refbc_176865_AY211451	416	48942	198862	53906	227142	191458	54746	54746
refbc_176865_FJ011860	421	48942	198862	66394	225362	195322	60870	60870
refbc_176866_AY211452	416	48942	198862	53906	227142	191458	54746	54746
refbc_176866_FJ011861	414	48942	198862	53906	227142	191458	54746	54746
refbc_176867_AY211453	424	48942	198862	66394	225362	195322	60870	60870
refbc_176867_FJ011862	426	48942	198862	66394	225362	195322	60870	60870
refbc_176868_AY211457	411	41174	198862	53906	227142	191458	54746	54746
refbc_176868_FJ011866	410	41174	198862	53906	227142	191458	54746	54746
refbc_178611_FJ038996	454	48942	207382	66394	234362	203122	60870	60870
refbc_178611_GQ428768	487	56426	207382	66394	252362	218722	67314	67314
refbc_178750_AF525003	389	41174	187502	53906	218742	184378	54746	54746
refbc_178750_EU811962	355	41174	187502	53906	201942	170218	48942	48942
refbc_178756_AF525006	228	27122	159102	30846	167622	139222	36170	36170
refbc_178756_EU811942	523	56426	218742	66394	270362	234322	67314	67314
refbc_179042_AM922061	163	21434	150582	20914	153422	122182	27122	27122
refbc_179042_AM922062	163	21434	150582	20914	153422	122182	27122	27122
refbc_179065_AY507499	228	27122	159102	30846	167622	139222	36170	36170
refbc_179065_DQ265761	190	27122	150582	24758	167622	139222	31486	31486
refbc_179117_EU750452	365	41174	187502	53906	201942	170218	48942	48942
refbc_179117_EU750453	365	41174	187502	53906	201942	170218	48942	48942
refbc_179117_EU750454	365	41174	187502	53906	201942	170218	48942	48942
refbc_179117_EU750455	365	41174	187502	53906	201942	170218	48942	48942
refbc_179843_DQ450989	381	41174	187502	53906	210342	177298	54746	54746
refbc_179843_DQ450990	381	41174	187502	53906	210342	177298	54746	54746
refbc_179843_DQ450991	381	41174	187502	53906	210342	177298	54746	54746
refbc_179843_DQ450992	381	41174	187502	53906	210342	177298	54746	54746
refbc_179843_DQ450993	381	41174	187502	53906	210342	177298	54746	54746
refbc_179843_DQ450994	381	41174	187502	53906	210342	177298	54746	54746
refbc_179843_DQ450995	381	41174	187502	53906	210342	177298	54746	54746
refbc_179843_DQ450996	381	41174	187502	53906	210342	177298	54746	54746
refbc_180954_AB237064	422	48942	198862	66394	225362	195322	60870	60870
refbc_180954_AB237069	422	48942	198862	66394	225362	195322	60870	60870
refbc_180954_AB237070	422	48942	198862	66394	225362	195322	60870	60870
refbc_180954_GU576749	371	41174	187502	53906	210342	177298	54746	54746
refbc_182084_EF621687	445	48942	198862	66394	234362	203122	60870	60870
refbc_182084_GQ435027	183	21434	150582	24758	156058	139222	31486	31486
refbc_182105_GU935092	396	41174	198862	53906	218742	184378	54746	54746
refbc_182105_GU935093	396	41174	198862	53906	218742	184378	54746	54746
refbc_182114_EU213822	387	41174	187502	53906	218742	184378	54746	54746
refbc_182114_EU213823	385	41174	187502	53906	218742	184378	54746	54746
refbc_182114_EU213824	385	41174	187502	53906	218742	184378	54746	54746
refbc_182129_EU213825	378	41174	187502	53906	210342	177298	54746	54746
refbc_182129_EU213826	263	31486	170462	35490	184662	153422	41174	41174
refbc_182129_EU213827	377	41174	187502	53906	210342	177298	54746	54746
refbc_182372_AY943555	199	27122	159102	24758	167622	139222	31486	31486
refbc_182372_DQ667344	351	41174	187502	53906	201942	170218	48942	48942
refbc_182374_AY943539	299	36170	178982	35490	164122	136358	41174	41174
refbc_182374_AY943540	299	36170	178982	35490	164122	136358	41174	41174
refbc_183048_FJ846087	326	36170	178982	53906	198862	167622	48942	48942
refbc_183048_FJ846088	326	36170	178982	53906	185142	167622	48942	48942
refbc_183048_FJ846089	326	36170	178982	53906	185142	167622	48942	48942
refbc_183048_FJ846090	326	36170	178982	53906	198862	167622	48942	48942
refbc_183048_FJ846091	326	36170	178982	53906	185142	167622	48942	48942
refbc_183048_FJ846092	326	36170	178982	53906	198862	167622	48942	48942
refbc_183048_FJ846093	326	36170	178982	53906	185142	156058	48942	48942
refbc_183048_FJ846094	326	36170	178982	53906	198862	167622	48942	48942
refbc_183048_FJ846095	326	36170	178982	53906	198862	167622	48942	48942
refbc_183048_FJ846096	326	36170	178982	53906	185142	156058	48942	48942
refbc_183048_FJ846097	326	36170	178982	53906	198862	167622	48942	48942
refbc_183048_FJ846098	326	36170	178982	53906	185142	156058	48942	48942
refbc_183048_FJ846099	326	36170	178982	53906	185142	167622	48942	48942
refbc_183048_FJ846100	326	36170	178982	53906	198862	167622	48942	48942
refbc_183048_FJ846101	326	36170	178982	53906	198862	167622	48942	48942
refbc_183048_FJ846102	326	36170	178982	53906	198862	167622	48942	48942
refbc_183048_FJ846103	326	36170	178982	53906	198862	167622	48942	48942
refbc_183048_FJ846104	326	36170	178982	53906	198862	167622	48942	48942
refbc_183048_FJ846105	326	36170	178982	53906	185142	156058	48942	48942
refbc_183048_FJ846106	326	36170	178982	53906	198862	167622	48942	48942
refbc_183048_FJ846107	326	36170	178982	53906	185142	167622	48942	48942
refbc_183048_FJ846108	326	36170	178982	53906	198862	167622	48942	48942
refbc_183048_FJ846109	326	36170	178982	53906	185142	167622	48942	48942
refbc_183048_FJ846110	326	36170	178982	53906	185142	167622	48942	48942
refbc_183048_FJ846111	326	36170	178982	53906	185142	156058	48942	48942
refbc_183048_FJ846112	326	36170	178982	53906	185142	167622	48942	48942
refbc_183048_FJ846113	326	36170	178982	53906	198862	167622	48942	48942
refbc_183048_FJ846114	326	36170	178982	53906	198862	167622	48942	48942
refbc_183048_FJ846115	326	36170	178982	53906	198862	167622	48942	48942
refbc_183048_FJ846116	326	36170	178982	53906	185142	156058	48942	48942
refbc_183048_FJ846117	326	36170	178982	53906	198862	167622	48942	48942
refbc_183048_FJ846118	326	36170	178982	53906	198862	167622	48942	48942
refbc_183048_FJ846119	326	36170	178982	53906	198862	167622	48942	48942
refbc_183048_FJ846120	326	36170	178982	53906	185142	156058	48942	48942
refbc_183048_FJ846121	326	36170	178982	53906	198862	167622	48942	48942
refbc_183048_FJ846122	326	36170	178982	53906	185142	167622	48942	48942
refbc_183048_FJ846123	326	36170	178982	53906	198862	167622	48942	48942
refbc_183048_FJ846124	326	36170	178982	53906	185142	167622	48942	48942
refbc_183048_FJ846125	326	36170	178982	53906	198862	167622	48942	48942
refbc_183048_FJ846126	326	36170	178982	53906	198862	167622	48942	48942
refbc_183048_FJ846127	326	36170	178982	53906	185142	156058	48942	48942
refbc_183048_FJ846128	326	36170	178982	53906	198862	167622	48942	48942
refbc_183048_FJ846129	326	36170	178982	53906	185142	167622	48942	48942
refbc_183048_FJ846130	326	36170	178982	53906	185142	156058	48942	48942
refbc_183048_FJ846131	326	36170	178982	53906	198862	167622	48942	48942
refbc_183048_FJ846132	326	36170	178982	53906	185142	156058	48942	48942
refbc_183048_FJ846133	326	36170	178982	53906	198862	167622	48942	48942
refbc_183048_FJ846134	326	36170	178982	53906	185142	156058	48942	48942
refbc_183048_FJ846135	326	36170	178982	53906	185142	167622	48942	48942
refbc_183048_FJ846136	326	36170	178982	53906	198862	167622	48942	48942
refbc_183048_FJ846137	326	36170	178982	53906	185142	167622	48942	48942
refbc_183048_FJ846138	326	36170	178982	53906	198862	167622	48942	48942
refbc_183048_FJ846139	326	36170	178982	53906	185142	156058	48942	48942
refbc_183048_FJ846140	326	36170	178982	53906	198862	167622	48942	48942
refbc_183048_FJ846141	326	36170	178982	53906	185142	167622	48942	48942
refbc_183048_FJ846142	326	36170	178982	53906	185142	156058	48942	48942
refbc_183048_FJ846143	326	36170	178982	53906	198862	167622	48942	48942
refbc_183048_FJ846144	326	36170	178982	53906	185142	156058	48942	48942
refbc_183048_FJ846145	326	36170	178982	53906	198862	167622	48942	48942
refbc_183048_FJ846146	326	36170	178982	53906	185142	156058	48942	48942
refbc_183048_FJ846147	326	36170	178982	53906	198862	167622	48942	48942
refbc_183048_FJ846148	326	36170	178982	53906	185142	167622	48942	48942
refbc_183048_FJ846149	326	36170	178982	53906	198862	167622	48942	48942
refbc_183048_FJ846150	326	36170	178982	53906	185142	156058	48942	48942
refbc_183048_FJ846151	326	36170	178982	53906	198862	167622	48942	48942
refbc_183048_FJ846152	326	36170	178982	53906	185142	156058	48942	48942
refbc_183048_FJ846153	326	36170	178982	53906	185142	167622	48942	48942
refbc_183048_FJ846154	326	36170	178982	53906	198862	167622	48942	48942
refbc_183048_FJ846155	326	36170	178982	53906	185142	167622	48942	48942
refbc_183048_FJ846156	326	36170	178982	53906	198862	167622	48942	48942
refbc_183048_FJ846157	326	36170	178982	53906	185142	167622	48942	48942
refbc_183048_FJ846158	326	36170	178982	53906	185142	167622	48942	48942
refbc_183048_FJ846159	326	36170	178982	53906	198862	167622	48942	48942
refbc_183048_FJ846160	326	36170	178982	53906	185142	156058	48942	48942
refbc_183048_FJ846161	326	36170	178982	53906	198862	167622	48942	48942
refbc_183048_FJ846162	326	36170	178982	53906	198862	167622	48942	48942
refbc_183048_FJ846163	326	36170	178982	53906	198862	167622	48942	48942
refbc_183048_FJ846164	326	36170	178982	53906	198862	167622	48942	48942
refbc_183048_FJ846165	326	36170	178982	53906	198862	167622	48942	48942
refbc_183048_FJ846166	326	36170	178982	53906	198862	167622	48942	48942
refbc_183048_FJ846167	326	36170	178982	53906	185142	167622	48942	48942
refbc_183048_FJ846168	326	36170	178982	53906	198862	167622	48942	48942
refbc_183048_FJ846169	326	36170	178982	53906	185142	156058	48942	48942
refbc_183048_FJ846170	326	36170	178982	53906	185142	167622	48942	48942
refbc_183048_FJ846171	326	36170	178982	53906	198862	167622	48942	48942
refbc_183048_FJ846172	326	36170	178982	53906	185142	156058	48942	48942
refbc_183048_FJ846173	326	36170	178982	53906	185142	156058	48942	48942
refbc_183048_FJ846174	326	36170	178982	53906	198862	167622	48942	48942
refbc_183048_FJ846175	326	36170	178982	53906	185142	156058	48942	48942
refbc_183048_FJ846176	326	36170	178982	53906	198862	167622	48942	48942
refbc_183048_FJ846177	326	36170	178982	53906	198862	167622	48942	48942
refbc_183048_FJ846178	326	36170	178982	53906	198862	167622	48942	48942
refbc_183048_FJ846179	326	36170	178982	53906	185142	156058	48942	48942
refbc_183048_FJ846180	326	36170	178982	53906	185142	156058	48942	48942
refbc_183048_FJ846181	326	36170	178982	53906	185142	156058	48942	48942
refbc_183048_FJ846182	326	36170	178982	53906	185142	167622	48942	48942
refbc_183048_FJ846183	326	36170	178982	53906	198862	167622	48942	48942
refbc_183048_FJ846184	326	36170	178982	53906	198862	167622	48942	48942
refbc_183048_FJ846185	326	36170	178982	53906	198862	167622	48942	48942
refbc_183048_FJ846186	326	36170	178982	53906	185142	156058	48942	48942
refbc_183048_FJ846187	326	36170	178982	53906	198862	167622	48942	48942
refbc_183048_FJ846188	326	36170	178982	53906	198862	167622	48942	48942
refbc_183048_FJ846189	327	36170	178982	53906	185142	156058	48942	48942
refbc_183048_FJ846190	326	36170	178982	53906	198862	167622	48942	48942
refbc_183048_FJ846191	327	36170	178982	53906	185142	156058	48942	48942
refbc_183048_FJ846192	327	36170	178982	53906	198862	167622	48942	48942
refbc_183048_FJ846193	327	36170	178982	53906	185142	167622	48942	48942
refbc_183048_FJ846194	327	36170	178982	53906	198862	167622	48942	48942
refbc_183048_FJ846195	327	36170	178982	53906	185142	167622	48942	48942
refbc_183048_FJ846196	327	36170	178982	53906	185142	156058	48942	48942
refbc_183048_FJ846197	327	36170	178982	53906	198862	167622	48942	48942
refbc_183048_FJ846198	327	36170	178982	53906	198862	167622	48942	48942
refbc_183048_FJ846199	327	36170	178982	53906	198862	167622	48942	48942
refbc_183048_FJ846200	327	36170	178982	53906	185142	167622	48942	48942
refbc_183048_FJ846201	327	36170	178982	53906	198862	167622	48942	48942
refbc_183048_FJ846202	327	36170	178982	53906	185142	156058	48942	48942
refbc_183048_FJ846203	327	36170	178982	53906	198862	167622	48942	48942
refbc_183048_FJ846204	327	36170	178982	53906	185142	167622	48942	48942
refbc_183048_FJ846205	327	36170	178982	53906	198862	167622	48942	48942
refbc_183048_FJ846206	327	36170	178982	53906	185142	167622	48942	48942
refbc_183048_FJ846207	327	36170	178982	53906	198862	167622	48942	48942
refbc_183048_FJ846208	327	36170	178982	53906	198862	167622	48942	48942
refbc_183048_FJ846209	327	36170	178982	53906	185142	156058	48942	48942
refbc_183048_FJ846210	327	36170	178982	53906	198862	167622	48942	48942
refbc_183048_FJ846211	327	36170	178982	53906	185142	156058	48942	48942
refbc_183048_FJ846212	327	36170	178982	53906	198862	167622	48942	48942
refbc_183048_FJ846213	327	36170	178982	53906	198862	167622	48942	48942
refbc_183048_FJ846214	327	36170	178982	53906	198862	167622	48942	48942
refbc_183048_FJ846215	327	36170	178982	53906	185142	167622	48942	48942
refbc_183048_FJ846216	327	36170	178982	53906	198862	167622	48942	48942
refbc_183048_FJ846217	327	36170	178982	53906	185142	156058	48942	48942
refbc_183048_FJ846218	327	36170	178982	53906	185142	167622	48942	48942
refbc_183048_FJ846219	327	36170	178982	53906	198862	167622	48942	48942
refbc_183048_FJ846220	327	36170	178982	53906	185142	167622	48942	48942
refbc_183048_FJ846221	326	36170	178982	53906	198862	167622	48942	48942
refbc_183048_FJ846222	327	36170	178982	53906	185142	167622	48942	48942
refbc_183048_FJ846223	327	36170	178982	53906	198862	167622	48942	48942
refbc_183048_FJ846224	327	36170	178982	53906	185142	156058	48942	48942
refbc_183048_FJ846225	327	36170	178982	53906	198862	167622	48942	48942
refbc_183048_FJ846226	326	36170	178982	53906	185142	156058	48942	48942
refbc_183048_FJ846227	326	36170	178982	53906	198862	167622	48942	48942
refbc_183048_FJ846228	326	36170	178982	53906	198862	167622	48942	48942
refbc_183048_FJ846229	326	36170	178982	53906	198862	167622	48942	48942
refbc_183048_FJ846230	326	36170	178982	53906	185142	156058	48942	48942
refbc_183048_FJ846231	327	36170	178982	53906	198862	167622	48942	48942
refbc_183048_FJ846232	327	36170	178982	53906	198862	167622	48942	48942
refbc_183048_FJ846233	327	36170	178982	53906	185142	167622	48942	48942
refbc_183048_FJ846234	327	36170	178982	53906	198862	167622	48942	48942
refbc_183048_FJ846235	327	36170	178982	53906	185142	167622	48942	48942
refbc_183048_FJ846236	327	36170	178982	53906	185142	156058	48942	48942
refbc_183048_FJ846237	327	36170	178982	53906	198862	167622	48942	48942
refbc_183048_FJ846238	327	36170	178982	53906	185142	156058	48942	48942
refbc_183048_FJ846239	327	36170	178982	53906	198862	167622	48942	48942
refbc_183048_FJ846240	327	36170	178982	53906	198862	167622	48942	48942
refbc_183048_FJ846241	327	36170	178982	53906	198862	167622	48942	48942
refbc_183048_FJ846242	327	36170	178982	53906	198862	167622	48942	48942
refbc_183048_FJ846243	327	36170	178982	53906	185142	167622	48942	48942
refbc_183048_FJ846244	327	36170	178982	53906	198862	167622	48942	48942
refbc_183048_FJ846245	327	36170	178982	53906	185142	156058	48942	48942
refbc_183048_FJ846246	326	36170	178982	53906	198862	167622	48942	48942
refbc_183048_FJ846247	326	36170	178982	53906	185142	156058	48942	48942
refbc_183048_FJ846248	326	36170	178982	53906	198862	167622	48942	48942
refbc_183048_FJ846249	326	36170	178982	53906	198862	167622	48942	48942
refbc_183048_FJ846250	326	36170	178982	53906	185142	156058	48942	48942
refbc_183048_FJ846251	327	36170	178982	53906	198862	167622	48942	48942
refbc_183048_FJ846252	326	36170	178982	53906	185142	167622	48942	48942
refbc_183048_FJ846253	326	36170	178982	53906	198862	167622	48942	48942
refbc_183048_FJ846254	326	36170	178982	53906	185142	167622	48942	48942
refbc_183048_FJ846255	326	36170	178982	53906	198862	167622	48942	48942
refbc_183048_FJ846256	326	36170	178982	53906	198862	167622	48942	48942
refbc_183048_FJ846257	326	36170	178982	53906	185142	156058	48942	48942
refbc_183048_FJ846258	326	36170	178982	53906	185142	167622	48942	48942
refbc_183048_FJ846259	326	36170	178982	53906	198862	167622	48942	48942
refbc_183048_FJ846260	326	36170	178982	53906	198862	167622	48942	48942
refbc_183048_FJ846261	326	36170	178982	53906	198862	167622	48942	48942
refbc_183048_FJ846262	326	36170	178982	53906	198862	167622	48942	48942
refbc_183048_FJ846263	326	36170	178982	53906	185142	156058	48942	48942
refbc_183048_FJ846264	326	36170	178982	53906	198862	167622	48942	48942
refbc_183048_FJ846265	325	36170	178982	53906	185142	156058	48942	48942
refbc_183048_FJ846266	326	36170	178982	53906	185142	156058	48942	48942
refbc_183048_FJ846267	326	36170	178982	53906	198862	167622	48942	48942
refbc_183048_FJ846268	326	36170	178982	53906	198862	167622	48942	48942
refbc_183048_FJ846269	326	36170	178982	53906	198862	167622	48942	48942
refbc_183048_FJ846270	326	36170	178982	53906	198862	167622	48942	48942
refbc_183048_FJ846271	326	36170	178982	53906	198862	167622	48942	48942
refbc_183048_FJ846272	326	36170	178982	53906	198862	167622	48942	48942
refbc_183048_FJ846273	326	36170	178982	53906	185142	167622	48942	48942
refbc_183048_FJ846274	326	36170	178982	53906	198862	167622	48942	48942
refbc_183048_FJ846275	326	36170	178982	53906	185142	167622	48942	48942
refbc_183048_FJ846276	326	36170	178982	53906	185142	167622	48942	48942
refbc_183048_FJ846277	326	36170	178982	53906	198862	167622	48942	48942
refbc_183048_FJ846278	326	36170	178982	53906	185142	167622	48942	48942
refbc_183048_FJ846279	326	36170	178982	53906	198862	167622	48942	48942
refbc_183048_FJ846280	326	36170	178982	53906	198862	167622	48942	48942
refbc_183048_FJ846281	326	36170	178982	53906	185142	156058	48942	48942
refbc_183048_FJ846282	326	36170	178982	53906	198862	167622	48942	48942
refbc_183048_FJ846283	326	36170	178982	53906	198862	167622	48942	48942
refbc_183048_FJ846284	326	36170	178982	53906	185142	167622	48942	48942
refbc_183048_FJ846285	327	36170	178982	53906	185142	156058	48942	48942
refbc_183048_FJ846286	327	36170	178982	53906	198862	167622	48942	48942
refbc_183048_FJ846287	326	36170	178982	53906	198862	167622	48942	48942
refbc_183048_FJ846288	326	36170	178982	53906	185142	167622	48942	48942
refbc_183277_EF419597	464	48942	207382	66394	243362	210922	60870	60870
refbc_183277_EF419598	462	48942	207382	66394	243362	210922	60870	60870
refbc_183838_EF590699	496	56426	207382	66394	261362	226522	67314	67314
refbc_183838_GQ248304	321	36170	178982	53906	198862	167622	48942	48942
refbc_183845_AM489825	432	48942	198862	66394	225362	195322	60870	60870
refbc_183845_DQ915424	438	48942	198862	66394	234362	203122	60870	60870
refbc_183845_DQ915425	436	48942	198862	66394	234362	203122	60870	60870
refbc_183845_DQ915426	452	48942	207382	66394	234362	203122	60870	60870
refbc_183845_DQ915427	415	48942	198862	53906	227142	191458	54746	54746
refbc_183845_DQ915428	410	41174	198862	53906	227142	191458	54746	54746
refbc_183845_DQ915429	460	48942	207382	66394	243362	210922	60870	60870
refbc_183845_DQ915430	441	48942	198862	66394	234362	203122	60870	60870
refbc_183845_DQ915431	428	48942	198862	66394	225362	195322	60870	60870
refbc_183845_DQ915432	414	48942	198862	53906	227142	191458	54746	54746
refbc_183845_DQ915433	399	41174	198862	53906	218742	184378	54746	54746
refbc_183845_DQ915434	392	41174	198862	53906	218742	184378	54746	54746
refbc_183845_DQ915435	394	41174	198862	53906	218742	184378	54746	54746
refbc_183845_DQ915436	449	48942	207382	66394	234362	203122	60870	60870
refbc_183845_DQ915437	447	48942	198862	66394	234362	203122	60870	60870
refbc_183845_DQ915438	404	41174	198862	53906	227142	191458	54746	54746
refbc_183944_GQ434933	153	21434	139222	20914	153422	122182	21434	21434
refbc_183944_GQ434934	153	21434	139222	20914	153422	122182	21434	21434
refbc_185002_EF590729	377	41174	187502	53906	210342	177298	54746	54746
refbc_185002_EU036243	355	41174	187502	53906	201942	170218	48942	48942
refbc_185002_EU036244	355	41174	187502	53906	201942	170218	48942	48942
refbc_185002_EU036245	355	41174	187502	53906	201942	170218	48942	48942
refbc_185002_EU036246	355	41174	187502	53906	201942	170218	48942	48942
refbc_185002_EU036247	355	41174	187502	53906	201942	170218	48942	48942
refbc_185002_EU036248	355	41174	187502	53906	201942	170218	48942	48942
refbc_185002_EU036249	355	41174	187502	53906	201942	170218	48942	48942
refbc_185002_EU036250	355	41174	187502	53906	201942	170218	48942	48942
refbc_185002_EU036251	355	41174	187502	53906	201942	170218	48942	48942
refbc_185002_EU036252	336	36170	178982	53906	198862	167622	48942	48942
refbc_185002_EU036253	355	41174	187502	53906	201942	170218	48942	48942
refbc_185002_EU036254	355	41174	187502	53906	201942	170218	48942	48942
refbc_185002_EU036255	355	41174	187502	53906	201942	170218	48942	48942
refbc_185002_EU036256	355	41174	187502	53906	201942	170218	48942	48942
refbc_185002_GQ248371	407	41174	198862	53906	227142	191458	54746	54746
refbc_185171_GU216556	401	41174	198862	53906	218742	184378	54746	54746
refbc_185171_GU216557	400	41174	198862	53906	218742	184378	54746	54746
refbc_185174_GU216558	420	48942	198862	66394	227142	191458	60870	60870
refbc_185174_GU216559	433	48942	198862	66394	225362	195322	60870	60870
refbc_185191_GQ435084	359	41174	187502	53906	201942	170218	48942	48942
refbc_185191_GQ435085	359	41174	187502	53906	201942	170218	48942	48942
refbc_185542_EF590705	200	27122	159102	24758	167622	139222	31486	31486
refbc_185542_EU359321	398	41174	198862	53906	218742	184378	54746	54746
refbc_185542_GQ248322	433	48942	198862	66394	225362	195322	60870	60870
refbc_185975_EU424093	437	48942	198862	66394	234362	203122	60870	60870
refbc_185975_EU424094	436	48942	198862	66394	234362	203122	60870	60870
refbc_186520_FJ395468	159	21434	139222	20914	153422	122182	27122	27122
refbc_186520_GU592794	235	27122	159102	30846	167622	139222	36170	36170
refbc_186965_GQ435095	393	41174	198862	53906	218742	184378	54746	54746
refbc_186965_GQ435096	393	41174	198862	53906	218742	184378	54746	54746
refbc_187284_GU906227	309	36170	178982	53906	184662	153422	41174	41174
refbc_187284_GU906228	250	31486	170462	30846	167622	139222	36170	36170
refbc_187284_GU906230	344	36170	187502	53906	198862	167622	48942	48942
refbc_187284_GU906231	288	31486	178982	35490	171922	153422	41174	41174
refbc_187284_GU906232	288	31486	178982	35490	184662	153422	41174	41174
refbc_187284_GU906233	356	41174	187502	53906	201942	170218	48942	48942
refbc_187374_GU592455	421	48942	198862	66394	225362	195322	60870	60870
refbc_187374_GU592456	421	48942	198862	66394	225362	195322	60870	60870
refbc_187500_AM231766	376	41174	187502	53906	210342	177298	54746	54746
refbc_187500_AM231767	376	41174	187502	53906	210342	177298	54746	54746
refbc_187500_AM231768	376	41174	187502	53906	210342	177298	54746	54746
refbc_188296_FJ765709	433	48942	198862	66394	225362	195322	60870	60870
refbc_188296_FJ765710	433	48942	198862	66394	225362	195322	60870	60870
refbc_188296_FJ765711	434	48942	198862	66394	225362	195322	60870	60870
refbc_188296_FJ765712	434	48942	198862	66394	225362	195322	60870	60870
refbc_188296_FJ765713	434	48942	198862	66394	225362	195322	60870	60870
refbc_188296_FJ765714	434	48942	198862	66394	225362	195322	60870	60870
refbc_188296_FJ765715	434	48942	198862	66394	225362	195322	60870	60870
refbc_188296_FJ765716	434	48942	198862	66394	225362	195322	60870	60870
refbc_188296_FJ765717	434	48942	198862	66394	225362	195322	60870	60870
refbc_188296_FJ765718	434	48942	198862	66394	225362	195322	60870	60870
refbc_188296_FJ765719	434	48942	198862	66394	225362	195322	60870	60870
refbc_188296_FJ765720	434	48942	198862	66394	225362	195322	60870	60870
refbc_188296_FJ765721	434	48942	198862	66394	225362	195322	60870	60870
refbc_188296_FJ765722	434	48942	198862	66394	225362	195322	60870	60870
refbc_188296_FJ765723	433	48942	198862	66394	225362	195322	60870	60870
refbc_188296_FJ765724	433	48942	198862	66394	225362	195322	60870	60870
refbc_188296_FJ765725	433	48942	198862	66394	225362	195322	60870	60870
refbc_189238_AY155652	271	31486	170462	35490	184662	153422	41174	41174
refbc_189238_FJ395460	352	41174	187502	53906	201942	170218	48942	48942
refbc_189247_EF538048	423	48942	198862	66394	225362	195322	60870	60870
refbc_189247_GQ435114	424	48942	198862	66394	225362	195322	60870	60870
refbc_189247_GQ435115	424	48942	198862	66394	225362	195322	60870	60870
refbc_189247_GQ435116	424	48942	198862	66394	225362	195322	60870	60870
refbc_189247_GQ435117	424	48942	198862	66394	225362	195322	60870	60870
refbc_189247_GQ435118	424	48942	198862	66394	225362	195322	60870	60870
refbc_189327_DQ786538	380	41174	187502	53906	210342	177298	54746	54746
refbc_189327_EF174573	265	31486	170462	35490	184662	153422	41174	41174
refbc_189328_DQ786540	364	41174	187502	53906	201942	170218	48942	48942
refbc_189328_FN668446	344	36170	187502	53906	198862	167622	48942	48942
refbc_190735_EF643849	406	41174	198862	53906	227142	191458	54746	54746
refbc_190735_EF643858	406	41174	198862	53906	227142	191458	54746	54746
refbc_190735_EF643859	406	41174	198862	53906	227142	191458	54746	54746
refbc_190738_EF643867	392	41174	198862	53906	218742	184378	54746	54746
refbc_190738_EF643869	421	48942	198862	66394	225362	195322	60870	60870
refbc_190738_EF643881	421	48942	198862	66394	225362	195322	60870	60870
refbc_190738_EF643882	417	48942	198862	53906	227142	191458	54746	54746
refbc_190745_EF643878	421	48942	198862	66394	225362	195322	60870	60870
refbc_190745_EF643879	407	41174	198862	53906	227142	191458	54746	54746
refbc_190745_EF643880	392	41174	198862	53906	218742	184378	54746	54746
refbc_190747_EF643874	421	48942	198862	66394	225362	195322	60870	60870
refbc_190747_EF643883	262	31486	170462	35490	171922	153422	36170	36170
refbc_190756_EF643865	421	48942	198862	66394	225362	195322	60870	60870
refbc_190756_EF643872	421	48942	198862	66394	225362	195322	60870	60870
refbc_190803_AJ876583	364	41174	187502	53906	201942	170218	48942	48942
refbc_190803_AJ876584	395	41174	198862	53906	218742	184378	54746	54746
refbc_190902_AY643656	255	31486	170462	30846	167622	139222	36170	36170
refbc_190902_AY643657	255	31486	170462	30846	148978	123738	36170	36170
refbc_190902_AY643658	255	31486	170462	30846	167622	139222	36170	36170
refbc_190902_AY643659	255	31486	170462	30846	167622	139222	36170	36170
refbc_190902_AY643660	255	31486	170462	30846	167622	139222	36170	36170
refbc_190902_AY643661	255	31486	170462	30846	156058	139222	36170	36170
refbc_190902_AY643662	255	31486	170462	30846	148978	123738	36170	36170
refbc_191181_DQ661036	402	41174	198862	53906	218742	184378	54746	54746
refbc_191181_DQ661037	408	41174	198862	53906	227142	191458	54746	54746
refbc_191181_DQ661038	424	48942	198862	66394	225362	195322	60870	60870
refbc_191181_DQ661039	424	48942	198862	66394	225362	195322	60870	60870
refbc_191181_DQ661040	424	48942	198862	66394	225362	195322	60870	60870
refbc_191181_DQ661041	424	48942	198862	66394	225362	195322	60870	60870
refbc_191181_DQ661042	402	41174	198862	53906	218742	184378	54746	54746
refbc_191184_DQ383906	450	48942	207382	66394	234362	203122	60870	60870
refbc_191184_DQ383907	450	48942	207382	66394	234362	203122	60870	60870
refbc_191662_EU850234	543	56426	218742	66394	272546	235542	77162	77162
refbc_191662_EU850235	552	56426	218742	83366	282266	243942	77162	77162
refbc_191701_EF660688	413	48942	198862	53906	227142	191458	54746	54746
refbc_191701_GQ435297	285	31486	170462	35490	184662	153422	41174	41174
refbc_191701_GQ435298	285	31486	170462	35490	171922	153422	41174	41174
refbc_191701_GQ865736	282	31486	170462	35490	184662	153422	41174	41174
refbc_191701_GQ865737	282	31486	170462	35490	156322	129878	41174	41174
refbc_191701_GQ865738	282	31486	170462	35490	184662	153422	41174	41174
refbc_191701_GQ865739	282	31486	170462	35490	184662	153422	41174	41174
refbc_191701_GQ865740	282	31486	170462	35490	184662	153422	41174	41174
refbc_191701_GQ865741	282	31486	170462	35490	184662	153422	41174	41174
refbc_191894_DQ208809	316	36170	178982	53906	184662	153422	48942	48942
refbc_191894_DQ208810	302	36170	178982	35490	184662	153422	41174	41174
refbc_191894_DQ208811	316	36170	178982	53906	184662	153422	48942	48942
refbc_191894_DQ208812	317	36170	178982	53906	171922	153422	48942	48942
refbc_191894_DQ208813	316	36170	178982	53906	184662	153422	48942	48942
refbc_191894_DQ208814	316	36170	178982	53906	171922	142838	48942	48942
refbc_191894_DQ208815	316	36170	178982	53906	184662	153422	48942	48942
refbc_191894_DQ208816	288	31486	178982	35490	171922	153422	41174	41174
refbc_191894_DQ208817	313	36170	178982	53906	184662	153422	48942	48942
refbc_191894_DQ208818	316	36170	178982	53906	171922	142838	48942	48942
refbc_191894_DQ208819	316	36170	178982	53906	184662	153422	48942	48942
refbc_191894_DQ208820	316	36170	178982	53906	171922	142838	48942	48942
refbc_191894_DQ208821	312	36170	178982	53906	171922	153422	48942	48942
refbc_191894_DQ208822	317	36170	178982	53906	184662	153422	48942	48942
refbc_191894_DQ208823	317	36170	178982	53906	171922	153422	48942	48942
refbc_191894_DQ208824	316	36170	178982	53906	184662	153422	48942	48942
refbc_191896_DQ501958	329	36170	178982	53906	198862	167622	48942	48942
refbc_191896_EF177401	329	36170	178982	53906	185142	167622	48942	48942
refbc_191950_FJ668605	381	41174	187502	53906	210342	177298	54746	54746
refbc_191950_FJ668608	378	41174	187502	53906	210342	177298	54746	54746
refbc_191950_FJ668609	378	41174	187502	53906	210342	177298	54746	54746
refbc_192045_FJ871905	427	48942	198862	66394	225362	195322	60870	60870
refbc_192045_FJ871906	409	41174	198862	53906	227142	191458	54746	54746
refbc_192771_EU123008	355	41174	187502	53906	201942	170218	48942	48942
refbc_192771_EU123009	355	41174	187502	53906	201942	170218	48942	48942
refbc_192771_EU338481	355	41174	187502	53906	201942	170218	48942	48942
refbc_192771_EU338482	355	41174	187502	53906	201942	170218	48942	48942
refbc_193483_FJ918127	364	41174	187502	53906	201942	170218	48942	48942
refbc_193483_FJ918128	364	41174	187502	53906	201942	170218	48942	48942
refbc_193483_FJ918129	364	41174	187502	53906	201942	170218	48942	48942
refbc_193483_FJ918130	364	41174	187502	53906	201942	170218	48942	48942
refbc_193485_FJ918150	363	41174	187502	53906	201942	170218	48942	48942
refbc_193485_FJ918151	357	41174	187502	53906	201942	170218	48942	48942
refbc_193486_FJ918155	364	41174	187502	53906	201942	170218	48942	48942
refbc_193486_FJ918156	372	41174	187502	53906	210342	177298	54746	54746
refbc_193486_FJ918157	354	41174	187502	53906	201942	170218	48942	48942
refbc_194253_GQ436998	391	41174	198862	53906	218742	184378	54746	54746
refbc_194253_GQ436999	391	41174	198862	53906	218742	184378	54746	54746
refbc_194253_GQ437000	391	41174	198862	53906	218742	184378	54746	54746
refbc_194253_GQ437001	395	41174	198862	53906	218742	184378	54746	54746
refbc_194253_GQ437002	395	41174	198862	53906	218742	184378	54746	54746
refbc_194253_GQ437003	395	41174	198862	53906	218742	184378	54746	54746
refbc_194253_GQ437004	395	41174	198862	53906	218742	184378	54746	54746
refbc_194253_GQ437005	395	41174	198862	53906	218742	184378	54746	54746
refbc_194253_GQ437006	395	41174	198862	53906	218742	184378	54746	54746
refbc_194253_GQ437007	395	41174	198862	53906	218742	184378	54746	54746
refbc_194253_GQ437008	395	41174	198862	53906	218742	184378	54746	54746
refbc_194253_GQ437009	395	41174	198862	53906	218742	184378	54746	54746
refbc_194253_GQ437010	394	41174	198862	53906	218742	184378	54746	54746
refbc_194253_GQ437011	394	41174	198862	53906	218742	184378	54746	54746
refbc_194253_GQ437012	394	41174	198862	53906	218742	184378	54746	54746
refbc_194253_GQ437013	394	41174	198862	53906	218742	184378	54746	54746
refbc_194253_GQ437014	395	41174	198862	53906	218742	184378	54746	54746
refbc_194253_GQ437015	395	41174	198862	53906	218742	184378	54746	54746
refbc_194253_GQ437016	394	41174	198862	53906	218742	184378	54746	54746
refbc_194253_GQ437017	395	41174	198862	53906	218742	184378	54746	54746
refbc_194253_GQ437018	392	41174	198862	53906	218742	184378	54746	54746
refbc_194253_GQ437019	392	41174	198862	53906	218742	184378	54746	54746
refbc_194253_GQ437020	392	41174	198862	53906	218742	184378	54746	54746
refbc_194253_GQ437021	395	41174	198862	53906	218742	184378	54746	54746
refbc_194253_GQ437022	395	41174	198862	53906	218742	184378	54746	54746
refbc_194253_GQ437023	395	41174	198862	53906	218742	184378	54746	54746
refbc_194253_GQ437024	395	41174	198862	53906	218742	184378	54746	54746
refbc_194253_GQ437025	395	41174	198862	53906	218742	184378	54746	54746
refbc_194253_GQ437026	395	41174	198862	53906	218742	184378	54746	54746
refbc_194253_GQ437027	395	41174	198862	53906	218742	184378	54746	54746
refbc_194253_GQ437028	395	41174	198862	53906	218742	184378	54746	54746
refbc_194253_GQ437029	391	41174	198862	53906	218742	184378	54746	54746
refbc_194253_GQ437030	395	41174	198862	53906	218742	184378	54746	54746
refbc_194253_GQ437031	395	41174	198862	53906	218742	184378	54746	54746
refbc_194253_GQ437032	395	41174	198862	53906	218742	184378	54746	54746
refbc_194253_GQ437033	390	41174	187502	53906	218742	184378	54746	54746
refbc_194253_GQ437034	390	41174	187502	53906	218742	184378	54746	54746
refbc_194253_GQ437035	390	41174	187502	53906	218742	184378	54746	54746
refbc_194253_GQ437036	390	41174	187502	53906	218742	184378	54746	54746
refbc_194253_GQ437037	390	41174	187502	53906	218742	184378	54746	54746
refbc_194253_GQ437038	392	41174	198862	53906	218742	184378	54746	54746
refbc_194253_GQ437039	391	41174	198862	53906	218742	184378	54746	54746
refbc_194253_GQ437040	395	41174	198862	53906	218742	184378	54746	54746
refbc_194253_GQ437041	395	41174	198862	53906	218742	184378	54746	54746
refbc_194253_GQ437042	395	41174	198862	53906	218742	184378	54746	54746
refbc_194253_GQ437043	395	41174	198862	53906	218742	184378	54746	54746
refbc_194253_GQ437044	395	41174	198862	53906	218742	184378	54746	54746
refbc_194253_GQ437045	389	41174	187502	53906	218742	184378	54746	54746
refbc_194253_GQ437046	389	41174	187502	53906	218742	184378	54746	54746
refbc_194253_GQ437047	389	41174	187502	53906	218742	184378	54746	54746
refbc_194253_GQ437048	394	41174	198862	53906	218742	184378	54746	54746
refbc_194253_GQ437049	395	41174	198862	53906	218742	184378	54746	54746
refbc_194253_GQ437050	394	41174	198862	53906	218742	184378	54746	54746
refbc_194253_GQ437051	394	41174	198862	53906	218742	184378	54746	54746
refbc_194253_GQ437052	391	41174	198862	53906	218742	184378	54746	54746
refbc_194253_GQ437053	391	41174	198862	53906	218742	184378	54746	54746
refbc_194253_GQ437054	391	41174	198862	53906	218742	184378	54746	54746
refbc_194253_GQ437055	391	41174	198862	53906	218742	184378	54746	54746
refbc_194253_GQ437056	391	41174	198862	53906	218742	184378	54746	54746
refbc_194253_GQ437057	391	41174	198862	53906	218742	184378	54746	54746
refbc_194253_GQ437058	391	41174	198862	53906	218742	184378	54746	54746
refbc_194253_GQ437059	395	41174	198862	53906	218742	184378	54746	54746
refbc_194253_GQ437060	395	41174	198862	53906	218742	184378	54746	54746
refbc_194253_GQ437061	395	41174	198862	53906	218742	184378	54746	54746
refbc_194253_GQ437062	395	41174	198862	53906	218742	184378	54746	54746
refbc_194253_GQ437063	395	41174	198862	53906	218742	184378	54746	54746
refbc_194253_GQ437064	395	41174	198862	53906	218742	184378	54746	54746
refbc_194253_GQ437065	395	41174	198862	53906	218742	184378	54746	54746
refbc_194253_GQ437066	408	41174	198862	53906	227142	191458	54746	54746
refbc_194253_GQ437067	408	41174	198862	53906	227142	191458	54746	54746
refbc_194253_GQ437068	389	41174	187502	53906	218742	184378	54746	54746
refbc_194253_GQ437069	391	41174	198862	53906	218742	184378	54746	54746
refbc_194253_GQ437070	395	41174	198862	53906	218742	184378	54746	54746
refbc_194253_GQ437071	395	41174	198862	53906	218742	184378	54746	54746
refbc_194253_GQ437072	395	41174	198862	53906	218742	184378	54746	54746
refbc_194253_GQ437073	390	41174	187502	53906	218742	184378	54746	54746
refbc_194253_GQ437074	390	41174	187502	53906	218742	184378	54746	54746
refbc_194253_GQ437075	390	41174	187502	53906	218742	184378	54746	54746
refbc_194253_GQ437076	390	41174	187502	53906	218742	184378	54746	54746
refbc_194253_GQ437077	391	41174	198862	53906	218742	184378	54746	54746
refbc_194253_GQ437078	391	41174	198862	53906	218742	184378	54746	54746
refbc_194253_GQ437079	391	41174	198862	53906	218742	184378	54746	54746
refbc_194253_GQ437080	391	41174	198862	53906	218742	184378	54746	54746
refbc_194253_GQ437081	389	41174	187502	53906	218742	184378	54746	54746
refbc_194253_GQ437082	389	41174	187502	53906	218742	184378	54746	54746
refbc_194253_GQ437083	389	41174	187502	53906	218742	184378	54746	54746
refbc_194253_GQ437084	389	41174	187502	53906	218742	184378	54746	54746
refbc_194253_GQ437085	391	41174	198862	53906	218742	184378	54746	54746
refbc_194253_GQ437086	391	41174	198862	53906	218742	184378	54746	54746
refbc_194253_GQ437087	395	41174	198862	53906	218742	184378	54746	54746
refbc_194253_GQ437088	391	41174	198862	53906	218742	184378	54746	54746
refbc_194253_GQ437089	391	41174	198862	53906	218742	184378	54746	54746
refbc_194253_GQ437090	391	41174	198862	53906	218742	184378	54746	54746
refbc_194253_GQ437091	391	41174	198862	53906	218742	184378	54746	54746
refbc_194253_GQ437092	392	41174	198862	53906	218742	184378	54746	54746
refbc_194253_GQ437093	391	41174	198862	53906	218742	184378	54746	54746
refbc_194253_GQ437094	390	41174	187502	53906	218742	184378	54746	54746
refbc_194253_GQ437095	395	41174	198862	53906	218742	184378	54746	54746
refbc_194253_GQ437096	395	41174	198862	53906	218742	184378	54746	54746
refbc_194253_GQ437097	392	41174	198862	53906	218742	184378	54746	54746
refbc_194253_GQ437098	392	41174	198862	53906	218742	184378	54746	54746
refbc_194253_GQ437099	392	41174	198862	53906	218742	184378	54746	54746
refbc_194253_GQ437100	390	41174	187502	53906	218742	184378	54746	54746
refbc_194253_GQ437101	390	41174	187502	53906	218742	184378	54746	54746
refbc_194253_GQ437102	390	41174	187502	53906	218742	184378	54746	54746
refbc_194253_GQ437103	395	41174	198862	53906	218742	184378	54746	54746
refbc_194253_GQ437104	391	41174	198862	53906	218742	184378	54746	54746
refbc_194253_GQ437105	391	41174	198862	53906	218742	184378	54746	54746
refbc_194253_GQ437106	395	41174	198862	53906	218742	184378	54746	54746
refbc_194253_GQ437107	391	41174	198862	53906	218742	184378	54746	54746
refbc_194253_GQ437108	395	41174	198862	53906	218742	184378	54746	54746
refbc_194253_GQ437109	394	41174	198862	53906	218742	184378	54746	54746
refbc_194253_GQ437110	395	41174	198862	53906	218742	184378	54746	54746
refbc_194253_GQ437111	395	41174	198862	53906	218742	184378	54746	54746
refbc_194253_GQ437112	394	41174	198862	53906	218742	184378	54746	54746
refbc_194253_GQ437113	394	41174	198862	53906	218742	184378	54746	54746
refbc_194253_GQ437114	394	41174	198862	53906	218742	184378	54746	54746
refbc_194253_GQ437115	394	41174	198862	53906	218742	184378	54746	54746
refbc_194253_GQ437116	394	41174	198862	53906	218742	184378	54746	54746
refbc_194253_GQ437117	394	41174	198862	53906	218742	184378	54746	54746
refbc_194253_GQ437118	394	41174	198862	53906	218742	184378	54746	54746
refbc_194253_GQ437119	395	41174	198862	53906	218742	184378	54746	54746
refbc_194253_GQ437120	394	41174	198862	53906	218742	184378	54746	54746
refbc_194253_GQ437121	395	41174	198862	53906	218742	184378	54746	54746
refbc_194253_GQ437122	395	41174	198862	53906	218742	184378	54746	54746
refbc_194253_GQ437123	392	41174	198862	53906	218742	184378	54746	54746
refbc_194253_GQ437124	392	41174	198862	53906	218742	184378	54746	54746
refbc_194253_GQ437125	395	41174	198862	53906	218742	184378	54746	54746
refbc_194253_GQ437126	395	41174	198862	53906	218742	184378	54746	54746
refbc_194253_GQ437127	395	41174	198862	53906	218742	184378	54746	54746
refbc_194253_GQ437128	395	41174	198862	53906	218742	184378	54746	54746
refbc_194253_GQ437129	395	41174	198862	53906	218742	184378	54746	54746
refbc_194253_GQ437130	395	41174	198862	53906	218742	184378	54746	54746
refbc_194253_GQ437131	395	41174	198862	53906	218742	184378	54746	54746
refbc_194253_GQ437132	395	41174	198862	53906	218742	184378	54746	54746
refbc_194253_GQ437133	395	41174	198862	53906	218742	184378	54746	54746
refbc_194253_GQ437134	395	41174	198862	53906	218742	184378	54746	54746
refbc_194253_GQ437135	395	41174	198862	53906	218742	184378	54746	54746
refbc_194253_GQ437136	395	41174	198862	53906	218742	184378	54746	54746
refbc_194253_GQ437137	390	41174	187502	53906	218742	184378	54746	54746
refbc_194253_GQ437138	390	41174	187502	53906	218742	184378	54746	54746
refbc_194253_GQ437139	390	41174	187502	53906	218742	184378	54746	54746
refbc_194253_GQ437140	390	41174	187502	53906	218742	184378	54746	54746
refbc_194253_GQ437141	390	41174	187502	53906	218742	184378	54746	54746
refbc_194253_GQ437142	391	41174	198862	53906	218742	184378	54746	54746
refbc_194253_GQ437143	391	41174	198862	53906	218742	184378	54746	54746
refbc_194253_GQ437144	395	41174	198862	53906	218742	184378	54746	54746
refbc_194253_GQ437145	395	41174	198862	53906	218742	184378	54746	54746
refbc_194253_GQ437146	395	41174	198862	53906	218742	184378	54746	54746
refbc_194253_GQ437147	395	41174	198862	53906	218742	184378	54746	54746
refbc_194253_GQ437148	395	41174	198862	53906	218742	184378	54746	54746
refbc_194253_GQ437149	389	41174	187502	53906	218742	184378	54746	54746
refbc_194253_GQ437150	389	41174	187502	53906	218742	184378	54746	54746
refbc_194253_GQ437151	389	41174	187502	53906	218742	184378	54746	54746
refbc_194253_GQ437152	395	41174	198862	53906	218742	184378	54746	54746
refbc_194253_GQ437153	395	41174	198862	53906	218742	184378	54746	54746
refbc_194253_GQ437154	394	41174	198862	53906	218742	184378	54746	54746
refbc_194253_GQ437155	395	41174	198862	53906	218742	184378	54746	54746
refbc_194253_GQ437156	391	41174	198862	53906	218742	184378	54746	54746
refbc_194253_GQ437157	391	41174	198862	53906	218742	184378	54746	54746
refbc_194253_GQ437158	391	41174	198862	53906	218742	184378	54746	54746
refbc_194253_GQ437159	391	41174	198862	53906	218742	184378	54746	54746
refbc_194253_GQ437160	391	41174	198862	53906	218742	184378	54746	54746
refbc_194253_GQ437161	391	41174	198862	53906	218742	184378	54746	54746
refbc_194253_GQ437162	391	41174	198862	53906	218742	184378	54746	54746
refbc_194253_GQ437163	395	41174	198862	53906	218742	184378	54746	54746
refbc_194253_GQ437164	395	41174	198862	53906	218742	184378	54746	54746
refbc_194253_GQ437165	395	41174	198862	53906	218742	184378	54746	54746
refbc_194253_GQ437166	395	41174	198862	53906	218742	184378	54746	54746
refbc_194253_GQ437167	395	41174	198862	53906	218742	184378	54746	54746
refbc_194253_GQ437168	395	41174	198862	53906	218742	184378	54746	54746
refbc_194253_GQ437169	395	41174	198862	53906	218742	184378	54746	54746
refbc_194253_GQ437170	408	41174	198862	53906	227142	191458	54746	54746
refbc_194253_GQ437171	408	41174	198862	53906	227142	191458	54746	54746
refbc_194253_GQ437172	408	41174	198862	53906	227142	191458	54746	54746
refbc_194253_GQ437173	408	41174	198862	53906	227142	191458	54746	54746
refbc_194253_GQ437174	391	41174	198862	53906	218742	184378	54746	54746
refbc_194253_GQ437175	395	41174	198862	53906	218742	184378	54746	54746
refbc_194253_GQ437176	395	41174	198862	53906	218742	184378	54746	54746
refbc_194253_GQ437177	395	41174	198862	53906	218742	184378	54746	54746
refbc_194253_GQ437178	390	41174	187502	53906	218742	184378	54746	54746
refbc_194253_GQ437179	390	41174	187502	53906	218742	184378	54746	54746
refbc_194253_GQ437180	390	41174	187502	53906	218742	184378	54746	54746
refbc_194253_GQ437181	390	41174	187502	53906	218742	184378	54746	54746
refbc_194253_GQ437182	391	41174	198862	53906	218742	184378	54746	54746
refbc_194253_GQ437183	391	41174	198862	53906	218742	184378	54746	54746
refbc_194253_GQ437184	391	41174	198862	53906	218742	184378	54746	54746
refbc_194253_GQ437185	391	41174	198862	53906	218742	184378	54746	54746
refbc_194253_GQ437186	389	41174	187502	53906	218742	184378	54746	54746
refbc_194253_GQ437187	389	41174	187502	53906	218742	184378	54746	54746
refbc_194253_GQ437188	389	41174	187502	53906	218742	184378	54746	54746
refbc_194253_GQ437189	395	41174	198862	53906	218742	184378	54746	54746
refbc_194253_GQ437190	391	41174	198862	53906	218742	184378	54746	54746
refbc_194253_GQ437191	395	41174	198862	53906	218742	184378	54746	54746
refbc_194253_GQ437192	391	41174	198862	53906	218742	184378	54746	54746
refbc_194253_GQ437193	391	41174	198862	53906	218742	184378	54746	54746
refbc_194253_GQ437194	391	41174	198862	53906	218742	184378	54746	54746
refbc_194253_GQ437195	391	41174	198862	53906	218742	184378	54746	54746
refbc_194253_GQ437196	391	41174	198862	53906	218742	184378	54746	54746
refbc_194253_GQ437197	392	41174	198862	53906	218742	184378	54746	54746
refbc_194253_GQ437198	390	41174	187502	53906	218742	184378	54746	54746
refbc_194253_GQ437199	390	41174	187502	53906	218742	184378	54746	54746
refbc_194253_GQ437200	395	41174	198862	53906	218742	184378	54746	54746
refbc_194253_GQ437201	392	41174	198862	53906	218742	184378	54746	54746
refbc_194253_GQ437202	392	41174	198862	53906	218742	184378	54746	54746
refbc_194253_GQ437203	392	41174	198862	53906	218742	184378	54746	54746
refbc_194253_GQ437204	390	41174	187502	53906	218742	184378	54746	54746
refbc_194253_GQ437205	390	41174	187502	53906	218742	184378	54746	54746
refbc_194253_GQ437206	388	41174	187502	53906	218742	184378	54746	54746
refbc_194253_GQ982162	415	48942	198862	53906	227142	191458	54746	54746
refbc_194560_EF394293	318	36170	178982	53906	171922	153422	48942	48942
refbc_194560_EF394294	318	36170	178982	53906	171922	142838	48942	48942
refbc_194561_EF394264	321	36170	178982	53906	198862	167622	48942	48942
refbc_194561_EF394265	321	36170	178982	53906	185142	167622	48942	48942
refbc_194561_EF394266	321	36170	178982	53906	198862	167622	48942	48942
refbc_194561_EF394267	322	36170	178982	53906	185142	156058	48942	48942
refbc_194561_EU240617	327	36170	178982	53906	198862	167622	48942	48942
refbc_194562_EF394268	321	36170	178982	53906	198862	167622	48942	48942
refbc_194562_EF394269	321	36170	178982	53906	185142	156058	48942	48942
refbc_194562_EF394270	321	36170	178982	53906	198862	167622	48942	48942
refbc_194562_EF394271	322	36170	178982	53906	198862	167622	48942	48942
refbc_194562_EF394272	322	36170	178982	53906	198862	167622	48942	48942
refbc_194562_EF394273	322	36170	178982	53906	185142	167622	48942	48942
refbc_194562_EU240615	327	36170	178982	53906	185142	167622	48942	48942
refbc_196337_AY163517	334	36170	178982	53906	193542	163138	48942	48942
refbc_196337_AY163518	334	36170	178982	53906	198862	167622	48942	48942
refbc_196665_AF524961	383	41174	187502	53906	210342	177298	54746	54746
refbc_196665_EU811961	260	31486	170462	35490	167622	139222	36170	36170
refbc_197266_FJ026605	334	36170	178982	53906	198862	167622	48942	48942
refbc_197266_FJ026606	334	36170	178982	53906	198862	167622	48942	48942
refbc_197266_FJ026607	334	36170	178982	53906	193542	163138	48942	48942
refbc_198795_GQ429114	220	27122	159102	30846	167622	139222	31486	31486
refbc_198795_GQ982403	150	21434	139222	20914	123398	98274	21434	21434
refbc_198814_FM253735	554	65474	218742	83366	282266	243942	77162	77162
refbc_198814_FM253736	554	65474	218742	83366	282266	243942	77162	77162
refbc_198814_FM253737	554	65474	218742	83366	282266	243942	77162	77162
refbc_198814_FM253738	554	65474	218742	83366	282266	243942	77162	77162
refbc_198814_FM253739	554	65474	218742	83366	282266	243942	77162	77162
refbc_198814_FM253740	554	65474	218742	83366	282266	243942	77162	77162
refbc_198814_FM253741	554	65474	218742	83366	282266	243942	77162	77162
refbc_198814_FM253742	554	65474	218742	83366	282266	243942	77162	77162
refbc_198814_FM253743	554	65474	218742	83366	282266	243942	77162	77162
refbc_198814_FM253744	554	65474	218742	83366	282266	243942	77162	77162
refbc_198814_FM253745	554	65474	218742	83366	282266	243942	77162	77162
refbc_198814_FM253746	554	65474	218742	83366	282266	243942	77162	77162
refbc_198814_FM253747	554	65474	218742	83366	282266	243942	77162	77162
refbc_199147_AF525008	377	41174	187502	53906	210342	177298	54746	54746
refbc_199147_EU811993	344	36170	187502	53906	198862	167622	48942	48942
refbc_199148_AF525009	376	41174	187502	53906	210342	177298	54746	54746
refbc_199148_EU811992	343	36170	187502	53906	193542	167622	48942	48942
refbc_199149_AF525010	383	41174	187502	53906	210342	177298	54746	54746
refbc_199149_EU811968	373	41174	187502	53906	210342	177298	54746	54746
refbc_199152_AF525002	388	41174	187502	53906	218742	184378	54746	54746
refbc_199152_EU811995	355	41174	187502	53906	201942	170218	48942	48942
refbc_199159_AF524959	306	36170	178982	53906	184662	153422	41174	41174
refbc_199159_EU811963	432	48942	198862	66394	225362	195322	60870	60870
refbc_199159_EU811999	350	41174	187502	53906	201942	170218	48942	48942
refbc_199163_AF524976	380	41174	187502	53906	210342	177298	54746	54746
refbc_199163_AM922019	381	41174	187502	53906	210342	177298	54746	54746
refbc_199163_AM922020	381	41174	187502	53906	210342	177298	54746	54746
refbc_199163_AM922021	383	41174	187502	53906	210342	177298	54746	54746
refbc_199163_GQ118870	381	41174	187502	53906	210342	177298	54746	54746
refbc_199164_AF524978	387	41174	187502	53906	218742	184378	54746	54746
refbc_199164_EU811998	354	41174	187502	53906	201942	170218	48942	48942
refbc_199165_AF524982	394	41174	198862	53906	218742	184378	54746	54746
refbc_199165_EU811964	342	36170	187502	53906	198862	167622	48942	48942
refbc_200489_EF420893	376	41174	187502	53906	210342	177298	54746	54746
refbc_200489_GQ435128	392	41174	198862	53906	218742	184378	54746	54746
refbc_202129_EU311877	410	41174	198862	53906	227142	191458	54746	54746
refbc_202129_EU311878	410	41174	198862	53906	227142	191458	54746	54746
refbc_202129_EU311879	410	41174	198862	53906	227142	191458	54746	54746
refbc_202129_EU311880	410	41174	198862	53906	227142	191458	54746	54746
refbc_202129_EU311881	397	41174	198862	53906	218742	184378	54746	54746
refbc_202129_EU311882	397	41174	198862	53906	218742	184378	54746	54746
refbc_202129_EU311883	397	41174	198862	53906	218742	184378	54746	54746
refbc_202129_EU311884	397	41174	198862	53906	218742	184378	54746	54746
refbc_202129_EU311885	397	41174	198862	53906	218742	184378	54746	54746
refbc_202129_EU311886	410	41174	198862	53906	227142	191458	54746	54746
refbc_202129_EU311887	410	41174	198862	53906	227142	191458	54746	54746
refbc_202129_EU311888	410	41174	198862	53906	227142	191458	54746	54746
[truncated: 7,889 more rows]
